# Supplementary material for: Allogeneic adipose tissue-derived mesenchymal stem cells in ischaemic stroke (AMASCIS-02): a phase IIb, multicentre, double-blind, placebo-controlled clinical trial protocol
Source: PubMed Central journal article supplement — BMJ Open. 2021 Aug 9;11(8):e051790. doi: 10.1136/bmjopen-2021-051790 (PMC8354278; doi:10.1136/bmjopen-2021-051790), 2021-08-09
Supplement: bmjopen-2021-051790.draft_revisions.pdf [file bmjopen-2021-051790.draft_revisions.pdf]

# BMJ Open

BMJ Open is committed to open peer review. As part of this commitment we make the peer review history of every article we publish publicly available.

When an article is published we post the peer reviewers' comments and the authors' responses online. We also post the versions of the paper that were used during peer review. These are the versions that the peer review comments apply to.

The versions of the paper that follow are the versions that were submitted during the peer review process. They are not the versions of record or the final published versions. They should not be cited or distributed as the published version of this manuscript.

BMJ Open is an open access journal and the full, final, typeset and author-corrected version of record of the manuscript is available on our site with no access controls, subscription charges or pay-per-view fees (<http://bmjopen.bmj.com>).

If you have any questions on BMJ Open's open peer review process please email [info.bmjopen@bmj.com](mailto:info.bmjopen@bmj.com)

# BMJ Open

## **Allogeneic adipose tissue-derived mesenchymal stem cells in ischaemic stroke (AMASCIS-02): A phase IIb, multicentre, double-blind, placebo-controlled clinical trial protocol**

|                               |                                                                                                                                                                                                                                                                                                                                                                                                                                                                                                                          |
|-------------------------------|--------------------------------------------------------------------------------------------------------------------------------------------------------------------------------------------------------------------------------------------------------------------------------------------------------------------------------------------------------------------------------------------------------------------------------------------------------------------------------------------------------------------------|
| Journal:                      | <i>BMJ Open</i>                                                                                                                                                                                                                                                                                                                                                                                                                                                                                                          |
| Manuscript ID                 | bmjopen-2021-051790                                                                                                                                                                                                                                                                                                                                                                                                                                                                                                      |
| Article Type:                 | Protocol                                                                                                                                                                                                                                                                                                                                                                                                                                                                                                                 |
| Date Submitted by the Author: | 29-Mar-2021                                                                                                                                                                                                                                                                                                                                                                                                                                                                                                              |
| Complete List of Authors:     | de Celis-Ruiz, Elena; La Paz University Hospital Biomedical Research Foundation, Neurology<br>Fuentes, Blanca; La Paz University Hospital, Neurology<br>Moniche, Francisco; Virgen del Rocio University Hospital, Neurology<br>Montaner, J.; Virgen Macarena University Hospital, Neurology<br>Borobia, Alberto; La Paz University Hospital, Clinical Pharmacology<br>Gutiérrez-Fernández, M.; La Paz University Hospital, Neurology<br>Díez-Tejedor, Exuperio; Autonomous University of Madrid, Department of Neurology |
| Keywords:                     | Stroke < NEUROLOGY, Clinical trials < THERAPEUTICS, Adverse events < THERAPEUTICS                                                                                                                                                                                                                                                                                                                                                                                                                                        |
|                               |                                                                                                                                                                                                                                                                                                                                                                                                                                                                                                                          |

SCHOLARONE™  
Manuscripts

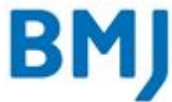

I, the Submitting Author has the right to grant and does grant on behalf of all authors of the Work (as defined in the below author licence), an exclusive licence and/or a non-exclusive licence for contributions from authors who are: i) UK Crown employees; ii) where BMJ has agreed a CC-BY licence shall apply, and/or iii) in accordance with the terms applicable for US Federal Government officers or employees acting as part of their official duties; on a worldwide, perpetual, irrevocable, royalty-free basis to BMJ Publishing Group Ltd ("BMJ") its licensees and where the relevant Journal is co-owned by BMJ to the co-owners of the Journal, to publish the Work in this journal and any other BMJ products and to exploit all rights, as set out in our [licence](#).

The Submitting Author accepts and understands that any supply made under these terms is made by BMJ to the Submitting Author unless you are acting as an employee on behalf of your employer or a postgraduate student of an affiliated institution which is paying any applicable article publishing charge ("APC") for Open Access articles. Where the Submitting Author wishes to make the Work available on an Open Access basis (and intends to pay the relevant APC), the terms of reuse of such Open Access shall be governed by a Creative Commons licence – details of these licences and which [Creative Commons](#) licence will apply to this Work are set out in our licence referred to above.

Other than as permitted in any relevant BMJ Author's Self Archiving Policies, I confirm this Work has not been accepted for publication elsewhere, is not being considered for publication elsewhere and does not duplicate material already published. I confirm all authors consent to publication of this Work and authorise the granting of this licence.

1  
2  
3 **Allogeneic adipose tissue-derived mesenchymal stem cells in ischaemic**  
4  
5  
6 **stroke (AMASCIS-02): A phase IIb, multicentre, double-blind,**  
7  
8 **placebo-controlled clinical trial protocol**  
9

10  
11 E. de Celis-Ruiz, MD,\*<sup>1</sup> B. Fuentes, MD, PhD,\*<sup>1</sup> F. Moniche, MD, PhD,<sup>2</sup> J. Montaner, MD,  
12  
13 PhD,<sup>3</sup> A. M. Borobia, MD, PhD,<sup>4</sup> M. Gutiérrez-Fernández, BiolD, PhD,<sup>1</sup> E. Díez-Tejedor<sup>1</sup> MD,  
14  
15  
16 PhD

17  
18  
19 Affiliation:

- 20  
21 1. Department of Neurology and Stroke Centre, Neurosciences Area - IdiPAZ (Health  
22  
23 Research Institute), La Paz University Hospital - Autonomous University of Madrid,  
24  
25 Madrid, Spain  
26  
27 2. Department of Neurology, Virgen del Rocío University Hospital, Institute of  
28  
29 Biomedicine of Seville, IBiS/Hospital Universitario Virgen del Rocío/CSIC, University  
30  
31 of Seville, Seville, Spain  
32  
33 3. Department of Neurology, Virgen Macarena University Hospital, Institute of  
34  
35 Biomedicine of Seville, IBiS/Hospital Universitario Virgen del Rocío/CSIC, University  
36  
37 of Seville, Seville, Spain  
38  
39 4. Department of Clinical Pharmacology, IdiPAZ (Health Research Institute), La Paz  
40  
41 University Hospital - Autonomous University of Madrid, Madrid, Spain  
42  
43  
44  
45  
46  
47

48 \*Elena de Celis and Blanca Fuentes equally contributed in the elaboration of this manuscript  
49

50  
51 Corresponding authors:

52  
53 -Prof Exuperio Díez Tejedor. Email address: [exuperio.diez@salud.madrid.org](mailto:exuperio.diez@salud.madrid.org)  
54

55  
56 -Dr Blanca Fuentes Gimeno. Email address: [blanca.fuentes@salud.madrid.org](mailto:blanca.fuentes@salud.madrid.org)  
57  
58  
59  
60

1  
2  
3 Address: La Paz University Hospital, General Building, Level 11, Neurology Department,  
4  
5 Paseo de la Castellana 261, 28046, Madrid, Spain.  
6  
7

8 *Word count:* Abstract 241 words, text body without references, abbreviations and author  
9  
10 affiliations 3622 words  
11  
12

13 List and legends of tables and figures:  
14

- 15 • Table 1. Methods flowchart
- 16
- 17 • Figure 1. Schematic flowchart of the clinical trial
- 18
- 19

20 List of abbreviations:  
21

- 22 • AD-MSCs: allogeneic adipose tissue-derived mesenchymal stem cells
- 23
- 24 • MSCs: mesenchymal stem cells
- 25
- 26 • CT: computed tomography
- 27
- 28 • MRI: magnetic resonance imaging
- 29
- 30 • NIHSS: National Institutes of Health Stroke Scale
- 31
- 32 • mRS: modified Rankin Scale
- 33
- 34 • AEs: Adverse events
- 35
- 36 • GM-CSF: granulocyte-macrophage colony-stimulating factor
- 37
- 38 • PDGF-BB: platelet-derived growth factor BB
- 39
- 40 • BDNF: brain-derived neurotrophic factor
- 41
- 42 • VEGF: vascular endothelial growth factor
- 43
- 44 • TGF-1: transforming growth factor 1
- 45
- 46 • GFAP: endostatin, glial fibrillary acid protein
- 47
- 48 • MBP: myelin basic protein
- 49
- 50 • MMP-3: matrix metalloproteinase 3
- 51
- 52 • ECG: electrocardiogram
- 53
- 54 • SCReN: Spanish Clinical Research Network
- 55
- 56 • IQR: interquartile range
- 57
- 58
- 59
- 60

## ABSTRACT

**Introduction:** Stroke is a serious public health problem, given it is a major cause of disability worldwide despite the spread of recanalisation therapies. Enhancement of brain plasticity with stem cell administration is a promising innovative therapy to reduce sequelae in these patients.

**Methods and analysis:** We have developed a phase IIb, multicentre, randomised, double-blind, placebo-controlled clinical trial protocol to evaluate the safety and efficacy of intravenous administration of allogeneic adipose tissue-derived mesenchymal stem cells (AD-MSCs) in patients with acute ischaemic stroke, concurrently with conventional stroke treatment. Thirty patients will be randomised on a 1:1 basis to receive either intravenous placebo or allogeneic AD-MSCs as soon as possible within the first 4 days from stroke symptom onset. Patients will be followed up to 24 months after randomisation. The primary objective is the safety assessment of early intravenous administration of allogeneic AD-MSCs by reporting all adverse events and neurological or systemic complications in both treatment groups. Secondary objectives assess efficacy of early intravenous AD-MSC treatment in acute ischaemic stroke by evaluating changes in the modified Rankin Scale and the National Institutes of Health Stroke Scale throughout the follow-up period. In addition, brain repair biomarkers will be measured at various visits.

**Ethics and dissemination:** This clinical trial has been approved by the Clinical Research Ethics Committee of La Paz University Hospital (Madrid, Spain) and by the Spanish Agency of Medication and Health Products. It has been registered in Eudra CT (2019-001724-35) and ClinicalTrials.gov (NCT04280003).

### Strengths and limitations

- First multicentre clinical trial evaluating safety and possible efficacy of early intravenous treatment with adipose derived mesenchymal stem cells in ischemic stroke.
- Allogeneic adipose derived mesenchymal stem cells are abundant, easily accessible and have low immunogenicity.
- Limitations: early-phase study with only two centres in the same country recruiting patients.

**KEY WORDS:** *Acute ischaemic stroke, Allogeneic adipose tissue-derived mesenchymal stem cells, Clinical trial, Stem cell therapy, safety.*

## INTRODUCTION

Stroke is a serious health problem, given it is one of the most common causes of mortality and the leading cause of disability due to neurologic diseases worldwide. In 2016, the global estimated incidence of stroke ranged between 189 and 218 cases per 100,000 inhabitants.[1] A large proportion of patients with ischaemic stroke have persistent neurological deficits that impair their daily life activities, and many also experience non-neurological complications, such as pulmonary and urinary tract infections, deep vein thrombosis and depression. In the last 2 decades, there has been a breakthrough in ischaemic stroke treatments. However, currently available therapies, such as intravenous thrombolysis and mechanical thrombectomy, focus only on reperfusion in the acute phase and are not accessible to all patients due to a narrow time window and eligibility issues. Furthermore, these cerebral reperfusion-based therapies cannot reverse established ischaemic injury or reduce its sequelae. Therefore, to reduce the burden of this disease, there is an urgent need for therapies that can enhance patient recovery after stroke.

After a brain injury, several interrelated mechanisms, such as neurogenesis, gliogenesis, oligodendrogenesis, synaptogenesis and angiogenesis take place to repair the damaged tissue. In clinical practice, these processes are stimulated through rehabilitation therapies; however, cell therapies promote tissue repair exogenously,[2] which could complement current reperfusion treatments for acute ischaemic stroke.

Stem cells are immature cells with the capacity to differentiate into diverse cell lines. At present, challenges concerning the most suitable cell type, route and time of administration are the main issues for progression from preclinical studies to the design of clinical trials.[3-5]

Regarding the route of administration, preclinical studies have shown that it is not mandatory for stem cells to migrate and nest at the injury site to achieve functional recovery after stroke, given their therapeutic effect is also due to secretion of trophic factors and modulation of the immune response.[5,6] Intravenous administration has been proven to be noninferior to other routes in preclinical studies, such as in intracerebral, intrathecal or intra-arterial deliveries, and it is far less



1  
2  
3 invasive. Regarding cell type, preclinical and initial clinical trial data [5,7,8,9,10,11] suggest that  
4 mesenchymal stem cells (MSCs) constitute a safe and possibly effective therapy in ischaemic  
5 stroke. Allogeneic MSCs lack human leucocyte antigen-class II molecules, avoiding the risk of  
6 rejection and allowing short timings of administration.  
7  
8  
9

10  
11  
12 Most studies concerning cell therapies in ischaemic stroke have been performed in chronic stages  
13 of the disease, although data from preclinical studies as well as the recent MASTERS trial suggest  
14 their early administration could be more effective. In the MASTERS trial,[12] intravenous  
15 administration of multipotent adult progenitor cells in patients with acute ischaemic stroke did  
16 not provoke any safety concerns or administration issues, and a tendency towards better functional  
17 recovery in the early treatment arm (<36 h from symptom onset instead of 36–48 h) versus  
18 placebo was observed. This observation was also supported by the fact that the trophic factors  
19 released during the acute phase after stroke inhibited the first steps of the ischaemic cascade and  
20 enhanced brain protection mechanisms.[3,13,14]  
21  
22  
23  
24  
25  
26  
27  
28  
29  
30

31  
32 Adipose tissue-derived mesenchymal stem cells (AD-MSCs) are abundant, accessible and easy  
33 to obtain by lipoaspiration techniques;[15,16] they also can be administered without ethical  
34 concerns.[13] Their intravenous administration has been proven safe in rat models of ischaemic  
35 stroke and has also been associated with good functional recovery, reductions in cell death and  
36 increased cell proliferation at the peri-infarct zone without observed implantation of the AD-  
37 MSCs at the infarct site.[17, 18] To our knowledge, the first clinical trial assessing the safety and  
38 efficacy of intravenous administration of allogeneic AD-MSCs in patients with ischaemic stroke  
39 is the AMASCIS-01 trial (NCT01678534),[19] which has been performed by our study group.  
40 Although the 2-year follow-up results have not yet been published, a safety interim analysis at 6  
41 months showed no safety concerns when the AD-MSCs were administered within the first 2  
42 weeks after symptom onset.[20] Other case reports and clinical trials exploring this cell type in  
43 non-ischemic neurological diseases [21] and non-neurological diseases, such as in acute  
44 respiratory distress and refractory rheumatoid arthritis, have also shown no safety issues  
45 compared with the placebo group.[22, 23] .  
46  
47  
48  
49  
50  
51  
52  
53  
54  
55  
56  
57  
58  
59  
60

1  
2  
3 In preclinical studies, the MSC dose in ischaemic stroke animal models has been variable, being  
4 between  $10^4$ - $4.3 \times 10^7$  MSCs/kg.[7-10] Results appear more beneficial for lower rather than  
5 higher cell doses, which could be due to the fact that higher doses could potentially provoke a  
6 brain embolus or slow cerebral blood flow.[9] Our study group has used doses of  $1-2 \times 10^6$  cells/kg  
7 in preclinical studies without issue. In the MASTERS trial, a single intravenous total dose of 4 or  
8  $12 \times 10^8$  multipotent adult progenitor cells did not cause any safety issues. In the AMASCIS-01  
9 trial performed by our study group, a single dose of  $10^6$  AD-MSCs/kg was administered  
10 intravenously, also without safety concerns.  
11  
12  
13  
14  
15  
16  
17  
18  
19

20 Therefore, in the AMASCIS-02 trial, we aim to show the safety of early allogeneic AD-MSC  
21 intravenous administration ( $10^6$  cells/kg of the patient's weight within the first 4 days from stroke  
22 onset) and explore the possible efficacy of this therapy in reducing stroke-associated disability.  
23  
24  
25  
26

## 27 **MATERIALS AND METHODS**

### 28 **Design**

29  
30  
31  
32 The Allogeneic Adipose Tissue derived Mesenchymal Stem Cells in Ischemic Stroke  
33 (AMASCIS-02) study is an academic, randomised, double-blind, placebo-controlled multicentre  
34 clinical trial. The two recruiting centres are La Paz University Hospital and Virgen del Rocío  
35 University Hospital, both of them in Spain. EudraCT: 2019-001724-35. The study is registered at  
36 <http://www.clinicaltrials.gov> and identified by NCT04280003. Recruitment began on January  
37 2021.  
38  
39  
40  
41  
42  
43  
44  
45

### 46 **Primary objective**

47  
48 To assess the safety of intravenous administration of allogeneic AD-MSCs within the first 4 days  
49 from stroke onset in patients with acute ischaemic stroke.  
50  
51  
52  
53  
54  
55  
56  
57  
58  
59  
60

## Secondary objective

To assess potential efficacy of allogeneic AD-MSCs when administered within the first 4 days from stroke onset in patients with acute ischaemic stroke.

## Eligibility

Patients will be selected from the Neurology Department of both of the study centres. They will include adults who meet the following inclusion criteria and none of the exclusion criteria:

- **Inclusion criteria**

1. Men and women aged older than 18 years with acute ischaemic stroke.
2. Treatment within 4 days (+/- 1 day) from the onset of stroke symptoms or from the last time observed as asymptomatic.
3. A computed tomography (CT) or magnetic resonance imaging (MRI) scan compatible with the clinical diagnosis of acute nonlacunar ischaemic stroke in the region of the middle cerebral artery.
4. A score on the National Institutes of Health Stroke Scale (NIHSS) of 8–20, with at least 2 of these points in sections 5 and 6 (motor deficit) at the time of inclusion. NIHSS evaluation for screening of these patients will take place after finalisation of reperfusion therapies (if they have been performed) providing that the clinical condition of the patient is stable with no prevision of immediate recovery. A measurable focal neurologic disability must persist to the time of treatment administration.
5. A prestroke score on the modified Rankin Scale (mRS)  $\leq 1$  (no significant disability).
6. Women with non-childbearing potential must have either (at least 1 criterion)
  - Undergone a hysterectomy and/or bilateral oophorectomy;

1  
2  
3 -Have medically confirmed ovarian failure; or  
4

5 -Achieved postmenopausal status: cessation of regular menses for at  
6  
7 least 12 consecutive months with no alternative cause.  
8

9  
10 7. Women with childbearing potential need a negative pregnancy test and  
11  
12 must agree to use adequate contraception during the duration of the  
13  
14 study.  
15

16 8. Signed informed consent.  
17

18 • **Exclusion criteria**  
19

20 1. Comatose patients ( $\geq 2$  score on item 1a of the NIHSS, related to degree  
21  
22 of awareness).  
23

24 2. Evidence on neuroimaging of brain tumour, cerebral oedema with  
25  
26 midline shift and a clinically significant compression of ventricles,  
27  
28 cerebellar or brainstem infarction and intraventricular, intracerebral or  
29  
30 subarachnoid haemorrhage. Small petechial haemorrhages are not  
31  
32 exclusion criteria.  
33

34 3. Current drug or alcohol dependence.  
35

36 4. Active infectious disease, including human immunodeficiency virus and  
37  
38 hepatitis B and C. A controlled infection is not an exclusion criterion.  
39

40 5. Pre-existing dementia.  
41

42 6. A health status, clinical condition or other characteristics that preclude  
43  
44 appropriate diagnosis, treatment or follow-up in the trial.  
45

46 7. Inability or unwillingness of the individual or their representative to  
47  
48 provide written informed consent.  
49

50 8. Participation in another clinical trial.  
51  
52  
53  
54  
55  
56  
57  
58  
59  
60

## Randomisation

Each patient will have a unique number assigned sequentially as they enter the study. The randomisation sequence was created using SAS version 9.4 statistical software (procedure 'PROC PLAN') with a 1:1 allocation. No randomisation seed was specified. The randomisation seed was generated taking the hour of the computer when the program was executed. Randomisation will be stratified by age (<65 years or ≥65 years). After verifying the inclusion and exclusion criteria, patients will be assigned the study drug or a placebo solution.

## Masking

The study is double-blind. After a patient is randomised by a blinded member of the research team, a nonblinded research member will request the corresponding study medication according to the randomisation code. The study medication and the placebo solution will be indistinguishable, and masking will be made by the nonblinded research team members.

## Outcomes

*Principal variables.* The safety of AD-MSCs will be assessed using the following parameters:

- Adverse events (AEs) reported spontaneously by the patient or in response to questions not addressed, and serious AEs (death, life-threatening events, events that require inpatient hospitalisation or prolongation of existing hospitalisation, events that result in persistent or significant disability, congenital anomalies or any other event that does not meet the definitions above but can be considered potentially serious).
- Neurological and systemic complications (including abnormal laboratory values): deteriorating stroke, stroke recurrences, brain oedema, seizures, haemorrhagic transformation, respiratory infections, urinary tract infections, deep venous thrombosis and pulmonary embolism.

1  
2  
3 *Secondary variables.* The efficacy of intravenous treatment with AD-MSCs will be assessed using  
4  
5 the following parameters:  
6  
7  
8

- 9 • Modified Rankin Scale (mRS): The outcome will be considered positive when  
10 the patient obtains a score of 0–3, measured at months 3, 6, 12 and 24. An additional  
11 exploratory efficacy analysis will consider mRS shift at months 3, 6, 12 and 24.  
12  
13
- 14 • National Institutes of Health Stroke Scale (NIHSS): Measured at all scheduled visits. A  
15 successful outcome will occur with an improvement of 75% or more from the baseline  
16 score. An additional exploratory efficacy analysis will measure differences in the median  
17 (interquartile range [IQR]) distribution and in the frequency of an NIHSS  $\leq 1$  between  
18 groups.  
19  
20
- 21 • Biomarker measurement: Granulocyte-macrophage colony-stimulating factor (GM-  
22 CSF), platelet-derived growth factor BB (PDGF-BB), brain-derived neurotrophic factor  
23 (BDNF), vascular endothelial growth factor (VEGF), transforming growth factor 1 (TGF-  
24 1), endostatin, glial fibrillary acid protein (GFAP), myelin basic protein (MBP), matrix  
25 metalloproteinase 3 (MMP-3) and extracellular vesicles will be measured at baseline, day  
26 7 and month 3 after treatment administration.  
27  
28  
29  
30  
31  
32  
33  
34  
35  
36  
37  
38

### 39 **Study procedures**

40  
41 After initial screening and randomisation (visit 1) takes place, the study treatment will be  
42 administered within the first four days since stroke symptom onset (visit 2). Eight more visits will  
43 take place during the 24 month follow-up period (2h, 24h, 7 days or hospital discharge, 3, 6, 12,  
44 18 and 24 months since treatment administration) to assess security and efficacy measures (see  
45 table 1 for details of study visits and procedures and figure 1 for schematic flowchart of the  
46 clinical trial design).  
47  
48  
49  
50  
51  
52  
53  
54  
55  
56  
57  
58  
59  
60

**Table 1. Flowchart of study visits and procedures**

| FLOWCHART                                                                    | Visit 1          | Visit 2            | Visit 3 | Visit 4 | Visit 5                                  | Visit 6       | Visit 7       | Visit 8        | Visit 9        | Visit 10       |
|------------------------------------------------------------------------------|------------------|--------------------|---------|---------|------------------------------------------|---------------|---------------|----------------|----------------|----------------|
|                                                                              | Screening        | Baseline<br>0 h    | 2h      | 24 h    | Day 7 or<br>Discharge <sup>d</sup><br>4) | M3<br>(±14 d) | M6<br>(±14 d) | M12<br>(±14 d) | M18<br>(±14 d) | M24<br>(±14 d) |
| Informed consent signature                                                   | X                |                    |         |         |                                          |               |               |                |                |                |
| Inclusion and exclusion criteria                                             | X                | X <sup>(2,3)</sup> |         |         |                                          |               |               |                |                |                |
| Past medical/surgical history Physical examination                           | X                |                    |         |         |                                          |               |               |                |                |                |
| Pregnancy test                                                               | X                |                    |         | X       | X                                        | X             | X             | X              | X              | X              |
| NIHSS                                                                        | X                | X <sup>(3)</sup>   | X       | X       | X                                        | X             | X             | X              | X              | X              |
| Modified Rankin Scale                                                        | X                |                    |         |         | X                                        | X             | X             | X              | X              | X              |
| Blood pressure                                                               | X                | X <sup>(3)</sup>   | X       | X       | X                                        |               |               |                |                |                |
| Heart rate                                                                   | X                | X <sup>(3)</sup>   | X       | X       | X                                        |               |               |                |                |                |
| Body temperature                                                             | X                | X <sup>(3)</sup>   | X       | X       | X                                        |               |               |                |                |                |
| Oxygen saturation                                                            | X                | X <sup>(3)</sup>   | X       | X       | X                                        |               |               |                |                |                |
| Capillary blood glucose                                                      | X                | X <sup>(3)</sup>   | X       | X       | X                                        |               |               |                |                |                |
| 12-lead ECG                                                                  | X                | X <sup>(3)</sup>   |         | X       |                                          |               |               |                |                | X              |
| Neuroimaging (brain CT)                                                      | X <sup>(1)</sup> |                    |         |         |                                          |               |               |                |                |                |
| Neuroimaging (brain MRI)                                                     | X <sup>(1)</sup> |                    |         |         |                                          |               |               |                |                |                |
| Randomisation                                                                | X                |                    |         |         |                                          |               |               |                |                |                |
| Study drug administration                                                    |                  | X                  |         |         |                                          |               |               |                |                |                |
| Laboratory assessments:<br>Haematology, coagulation test and<br>biochemistry | X                |                    |         | X       | X                                        |               |               |                |                | X              |
| Blood brain repair markers                                                   |                  | X <sup>(3)</sup>   |         |         | X                                        | X             |               |                |                |                |
| Adverse events register                                                      |                  | X <sup>(3)</sup>   | X       | X       | X                                        | X             | X             | X              | X              | X              |
| Concomitant drugs                                                            | X                | X <sup>(3)</sup>   | X       | X       | X                                        | X             | X             | X              | X              | X              |

NIHSS: National Institutes of Health Stroke Scale; ECG: electrocardiogram; CT: computed tomography; MRI: magnetic resonance imaging.

<sup>(1)</sup> Review Neuroimaging (one of them, CT or MRI)

<sup>(2)</sup> Review selection criteria

<sup>(3)</sup> Tests, measurements, registry of adverse events and study drug administration and also revision of inclusion and exclusion criteria will take place before study drug administration.

<sup>(4)</sup> Visit 5 is performed at day 7 after study drug administration or at hospital discharge if it takes place before day 7.

### **Treatment or intervention**

All study medications will be industrially manufactured, tested and released according to current Good Manufacturing Practice Guidelines by HistoCell. The experimental drug is an intravenous solution of allogeneic AD-MSCs in a concentration of 10 million cells per millilitre, obtained from a donor by *in vitro* cell culture techniques, conditioned in cryovials of Type I sterile borosilicate glass (with ringer lactate, glucosaline, sodium bicarbonate and human albumin 20% as excipients) and cryopreserved at  $-150^{\circ}$  C. The manufacturing process is detailed in the investigator's brochure, which has been approved by the Spanish Agency of Medicines and Health products. The placebo solution has the same appearance as the study drug and is formed by its excipients. Medication vials containing either solution will be dissolved in 50ml of physiologic saline solution and dispensed as a single intravenous drop administration in approximately 30 minutes, at a dose of 1 million cells per kg of the patient's weight (for the AD-MSCs).

### **Discontinuation of study medication**

The study medication must be discontinued if a suspected anaphylactic reaction or serious adverse event occurs during its administration or if patient participation consent is withdrawn.

### **Standard treatments for the management of acute stroke**

All patients will be managed according to current guidelines for acute stroke management, including treatment with recanalization therapies such as intravenous thrombolysis, mechanical thrombectomy or both.

### **Data collection and outcome measures**

An electronic case report form has been designed using MACRO. This system will maintain patient anonymity, and the data will be transferred to a '\*.csv' file to analyse it with R software (3.5.2 version or newer). To ensure the quality of the data, data management will be performed by the Spanish Clinical Research Network (SCReN). The data management plan has been



1  
2  
3 approved by the principal investigator and the sponsor. Data collection forms will be included in  
4  
5 the final report.  
6  
7

### 8 **Sample size estimates**

9  
10 Given this is a pilot phase II clinical trial focused on the assessment of safety, no systematic  
11  
12 sample size calculation applies. Based on the previous clinical trial, AMASCIS-01  
13  
14 (NCT01678534 and EudraCT: 2011-003551-18), it seems feasible to recruit 30 patients between  
15  
16 the 2 participating centres.  
17  
18

### 19 **Statistical analyses**

20  
21 Demographic and clinical characteristics will be summarised in terms of means and standard  
22  
23 deviations, median and IQR or relative frequency as appropriate for each variable type. A  
24  
25 univariate approach will be employed for calculating nonparametric tests for the continuous  
26  
27 variables (Wilcoxon rank sum), and Fisher's or a chi-squared test will be employed for the  
28  
29 categorical variables. Given the binary nature of the primary outcome, a logistic regression under  
30  
31 the minimum Akaike information criterion using all available variables will be fitted to the data,  
32  
33 estimating odds ratios and their confidence intervals. Rules of prediction for the binary outcome  
34  
35 will be performed using receiver operating characteristic curves and k-fold cross-validation  
36  
37 procedures. Only *P* values less than 0.05 will be considered significant. Statistical computations  
38  
39 will be calculated using the statistical computing environment R. The statistical analysis will be  
40  
41 performed by the personnel from the Clinical Pharmacology Service and Central Unit of Clinical  
42  
43 Investigation and Clinical Trials. The safety analysis will include tables with all AEs and  
44  
45 neurological and systemic complications. A descriptive analysis summarising efficacy variables  
46  
47 in each group will be performed and an exploratory analysis will be conducted by comparing both  
48  
49 treatment groups using the Wilcoxon rank sum test or Student's *t*-test.  
50  
51  
52  
53  
54  
55  
56  
57  
58  
59  
60

1  
2  
3 *Plans for predefined subgroup analyses:*  
4  
5

6 1) The “intention to treat” population will consist of all patients for whom baseline variables and  
7  
8 at least 1 value of a principal or secondary variable are available. If a final visit variable is not  
9  
10 obtained for a patient, it will be replaced by the last available value (LOCF=Last Observation  
11  
12 Carried Forward).  
13

14  
15 2) The “per protocol” population will consist of all patients for whom infusion of the study  
16  
17 medication had been started with no major protocol violation.  
18

19  
20 3) The “safety analysis population” will consist of all patients for whom infusion of the study  
21  
22 medication had been started.  
23

24  
25 **Data monitoring body**  
26

27 Coordination, management, monitoring, data management and the statistical analysis will be  
28  
29 performed by the SCReN.  
30

31  
32 **Auditing**  
33

34  
35 During the progress of the study, audit visits may be conducted at the participating centres. The  
36  
37 investigator will allow direct access to the source data/documents for monitoring, auditing, review  
38  
39 by the ethical research committee and inspection by the health authorities.  
40

41  
42 **Patient and Public Involvement**  
43

44  
45 The development of the research objectives and outcomes are based on the neurologist’s  
46  
47 experience treating this profile of patients and the desire to optimise brain tissue repair therapies.  
48  
49 Patients and their advisors were not involved in the design, recruitment or conduct of this study.  
50

51  
52 **SUMMARY AND CONCLUSIONS**  
53

54 AD-MSCs administered intravenously in the first days from stroke symptom onset could be a safe  
55  
56 and promising therapy to enhance recovery from brain ischaemia and to help reduce disability.  
57  
58 This type of cell therapy has already demonstrated its efficacy and safety in preclinical research,  
59  
60

1  
2  
3 but further studies are needed to prove similar results in patients with stroke. The advantages of  
4 AD-MSCs over other cell types are their accessibility and abundance, as well as their low  
5 immunogenicity. An intravenous infusion appears to be the most appropriate manner of  
6 administration, given it is the least aggressive, and cell therapies can be performed by  
7 modification of trophic factors and immunomodulation.  
8  
9  
10  
11  
12

13  
14 This clinical trial aims to demonstrate that early intravenous administration of AD-MSCs has no  
15 major safety complications and that it could possibly reduce disability due to stroke. Also,  
16 analysis of blood biomarkers and trophic factors will help elucidate and deepen our understanding  
17 of the mechanisms of action of cell therapy, along with previous results from other clinical  
18 trials.[24,25] The results of the AMASCIS-02 trial, together with those from the AMASCIS-01  
19 trial, will increase our knowledge of the safety of intravenous AD-MSC administration in patients  
20 with ischaemic stroke. We will then be able to conduct larger clinical trials to evaluate their  
21 efficacy and possibly enable their use in clinical practice in the near future.  
22  
23  
24  
25  
26  
27  
28  
29  
30

## 31 **DECLARATIONS**

### 32 **Conflicts of Interest**

33  
34  
35  
36  
37 The Funders and Sponsor will not interfere in the selection processes of patients, analysis of data  
38 and/or publication of the results, or in any other process that might interfere with the results of  
39 the study. Funding will be independent of the results of the study. The Principal Investigator has  
40 ultimate authority over any of these activities. The authors declare that they have no conflicts of  
41 interest.  
42  
43  
44  
45  
46  
47

### 48 **Funding**

49  
50  
51 This clinical trial has been promoted by the La Paz University Hospital Institute for Health  
52 Research – IdiPAZ (La Paz University Hospital – Autonomous University of Madrid) and  
53 sponsored from a peer review competitive grant (PIC18/00016) co-funded by the Carlos III Health  
54 Institute Health Care Research Fund and the European Regional Development Fund (ERDF) “A  
55  
56  
57  
58  
59  
60

1  
2  
3 way to make Europe”/”Investing in your future”. This clinical trial has been supported by  
4  
5 Plataforma Española de Investigación Clínica y Ensayos Clínicos, SCReN (Spanish Clinical  
6  
7 Research Network), co-funded by the Carlos III Health Institute-General Subdirection for  
8  
9 Evaluation and Promotion of Research, research PT17/0017/0013; State Plan for Scientific  
10  
11 Investigation, Technology and Innovation (2017–2020) and by the ERDF/European Social fund  
12  
13 “A way to make Europe”/”Investing in your future”.

### 14 15 16 **Ethics approval**

17  
18  
19 The researchers will adhere strictly to the provisions of this protocol and will complete the case  
20  
21 report forms. The study will be performed according to the recommendations for clinical studies  
22  
23 and the evaluation of drugs in humans, as contained in the Declaration of Helsinki (revised in  
24  
25 successive world assemblies) and in the current Spanish and European legislation on clinical  
26  
27 studies and patient data confidentiality. The study will follow the principles of Good Clinical  
28  
29 Practice. This study (protocol version 2, with date 5<sup>th</sup>May 2020) has been approved by the Clinical  
30  
31 Research Ethics Committee of La Paz University Hospital (Madrid, Spain) and by the Spanish  
32  
33 Agency of Medication and Health Products, and has been registered in Eudra CT (2019-001724-  
34  
35 35) and ClinicalTrials.gov (NCT04280003).

36  
37  
38 All protocol amendments will be evaluated by the Ethics Committee and the Spanish Agency of  
39  
40 Medication and Health Products, following the principles of Good Clinical Practice and national  
41  
42 legislation.

### 43 44 45 **Consent to participate**

46  
47  
48 Informed consent will be obtained by all individual participants included in this study, or by their  
49  
50 family member/representative.

### 51 52 53 **Consent for publication**

54  
55  
56 According to the Royal Decree 1090/2015, the results of this clinical trial will be published once  
57  
58 the study is completed.

### **Availability of data and material**

Data will be available from the corresponding author on reasonable request, considered compliant General Data Protection Regulation and the data-sharing agreement is approved by the relevant Spanish authorities. Trial results will be published in Open Access journals.

### **Authors contributions**

The first draft of the manuscript was written by Elena de Celis Ruiz, and all authors commented on previous versions of the manuscript. Blanca Fuentes, Exuperio Díez, Francisco Moniche, Joan Montaner, Alberto Borobia and María Gutiérrez participated in the study conception and design. All authors have read and approved the final manuscript.

### **Dissemination policy**

Output from this study will include open-journal publications, conference presentations and community reporting. Output will not identify participants.

### **Acknowledgments:**

We greatly appreciate the support of Morote Traducciones for editing assistance.

**REFERENCES**

- [1] GBD 2016 Neurology Collaborators. Global, regional, and national burden of neurological disorders, 1990-2016: a systematic analysis for the Global Burden of Disease Study 2016. *Lancet Neurol.* 2019;18(5):459
- [2] Gutiérrez-Fernández M, Fuentes B, Rodríguez-Frutos B, Ramos-Cejudo J, Vallejo-Cremades MT, Díez-Tejedor E. Trophic factors and cell therapy to stimulate brain repair after ischaemic stroke. *J Cell Mol Med.* 2012;16:2280-90.
- [3] Bang OY, Kim H, Cha M, Moon J. Adult Stem Cell Therapy for Stroke: Challenges and Progress. *J Stroke.* 2016;18:256-66.
- [4] Krause M, Phan TG, Ma H, Sobey CG, Lim R. Cell-Based Therapies for Stroke: Are We There Yet? *Front Neurol.* 2019;Jun 25;10:656
- [5] Rodríguez-Frutos B, Otero-Ortega L, Gutiérrez-Fernández M, Fuentes B, Ramos-Cejudo, Díez-Tejedor E. Stem Cell Therapy and Administration Routes After Stroke. *Transl Stroke Res* 2016;7:378-87.
- [6] Savitz SI. Developing Cellular Therapies for Stroke. *Stroke.* 2015;46:2026-31
- [7] Vu Q, Xie K, Eckert M, Zhao W, Cramer SC. Meta-analysis of preclinical studies of mesenchymal stromal cells for ischemic stroke. *Neurology.* 2014;82:1277-86
- [8] Lalu MM, Montroy J, Dowlathshahi D, Hutton B, Juneau P, Wesch N, et al. From the Lab to Patients a Systematic Review and Meta-Analysis of Mesenchymal Stem Cell Therapy for Stroke. *Transl Stroke Res.* 2020 Jun;11(3):345-364
- [9] Sarmah D, Agrawal V, Rane P, Bhute S, Watanabe M, Kalia K, et al. Mesenchymal Stem Cell Therapy in Ischemic Stroke: A Meta-analysis of Preclinical Studies. *Clin Pharmacol Ther.* 2018;103(6):990–8.
- [10]. Cui L li, Golubczyk D, Tolppanen AM, Boltze J, Jolkkonen J. Cell therapy for ischemic stroke: Are differences in preclinical and clinical study design responsible for the translational loss of efficacy? *Ann Neurol.* 2019;86(1):5–16.
- [11] Xue P, Wang M, Yan GH. Mesenchymal stem cell transplantation as an effective treatment strategy for ischemic stroke in Asia: A meta-analysis of controlled trials. *Ther Clin Risk Manag.* 2018;14:909–28.

- 1  
2  
3 [12] Hess DC, Wechsler LR, Clark WM, Savitz SI, Ford GA, Chiu D, et al. Safety and efficacy of  
4 multipotent adult progenitor cells in acute ischaemic stroke (MASTERS): a randomised, double-blind,  
5 placebo-controlled, phase 2 trial. *Lancet Neurol.* 2017;16:360-8.  
6  
7  
8  
9 [13] Gutierrez-Fernandez M, Otero-Ortega L, Ramos-Cejudo J, Rodriguez-Frutos B, Fuentes B, Díez-  
10 Tejedor E. Adipose tissue-derived mesenchymal stem cells as a strategy to improve recovery after stroke.  
11 *Expert Opin Biol Ther.* 2015;15:873-81.  
12  
13  
14 [14] Lee SH, Jin KS, Bang OY, Kim BJ, Park SJ, Lee NH, et al. Differential migration of mesenchymal  
15 stem cells to ischemic regions after middle cerebral artery occlusion in rats. *PLoS One.* 2015;10:1-11.  
16  
17  
18 [15]. Chang K-A, Lee J-H, Suh Y-H. Therapeutic potential of human adipose-derived stem cells in  
19 neurological disorders. *J Pharmacol Sci.* 2014;126:293-301.  
20  
21  
22 [16] Gutierrez-Fernandez M, Rodríguez-Frutos B, Otero-Ortega L, Ramos-Cejudo J, Fuentes B, Díez-  
23 Tejedor E. Adipose tissue-derived stem cells in stroke treatment: from bench to bedside. *Discov Med.*  
24 2013;16:37-43.  
25  
26 [17] Gutiérrez-Fernández M, Rodríguez-Frutos B, Ramos-Cejudo J, Teresa Vallejo-Cremades M, Fuentes  
27 B, Cerdán S, et al. Effects of intravenous administration of allogenic bone marrow- and adipose tissue-  
28 derived mesenchymal stem cells on functional recovery and brain repair markers in experimental ischemic  
29 stroke. *Stem Cell Res Ther.* 2013;4:11.  
30  
31 [18] Gómez -de Frutos M, Laso-García F, Diekhart L, Otero-Otega L et al. Intravenous delivery of  
32 adipose tissue-derived mesenchymal stem cells improves brain repair in hyperglucemic stroke rats. *Stem*  
33 *Cell Research and Therapy.* 2019; 10(1): 1-13  
34  
35 [19] Díez-Tejedor E, Gutiérrez-Fernández M, Martínez-Sánchez P, Rodríguez-Frutos B, Ruiz- Ares G, Lara  
36 ML, et al. Reparative Therapy for Acute Ischemic Stroke with Allogeneic Mesenchymal Stem Cells from  
37 Adipose Tissue: A Safety Assessment: A Phase II Randomized, Double-blind, Placebo-controlled, Single-  
38 center, Pilot Clinical Trial. *J Stroke Cerebrovasc Dis.* 2014;23:2694-700.  
39  
40  
41 [20] Fuentes, Blanca and Gutiérrez-Zúñiga, Raquel and Gutiérrez-Fernández, María and Alonso de  
42 Leciñana, María and Borobia, Alberto M. and Martínez-Ávila, José C. and Ruiz-Ares, Gerardo and Otero-  
43 Ortega, Laura and Laso-García, Fernando and Gómez-de Frutos, MariCarmen and Díez-Tejedor, Exuperio,  
44  
45  
46  
47  
48  
49  
50  
51  
52  
53  
54  
55  
56  
57  
58  
59  
60

1  
2  
3 Short-Term Safety of Allogeneic Adipose-Tissue Derived Mesenchymal Stem Cells in Acute Ischemic  
4 Stroke (AMASCIS): A Phase II, Randomised, Double-Blind, Placebo-Controlled, Single-Centre, Pilot  
5 Clinical Trial (July 13, 2019). Available at SSRN: <https://ssrn.com/abstract=3420416>  
6  
7

8  
9 [21] Hirano A, Sano M, Urushihata N, Tanemura H, Oki K, Suzaki E. Assessment of safety and feasibility  
10 of human allogeneic adipose-derived mesenchymal stem cells in a pediatric patient. *Pediatr Res* [Internet].  
11 2018;(April):575–7.  
12  
13

14  
15 [22] Zheng G, Huang L, Tong H, Shu Q, Hu Y, Ge M, et al. Treatment of acute respiratory distress  
16 syndrome with allogeneic adipose-derived mesenchymal stem cells: a randomized, placebo-controlled pilot  
17 study. *Respir Res*. 2014;15:39.  
18  
19

20  
21 [23] Álvaro-Gracia JM, Jover JA, García-Vicuña R, Carreño L, Alonso A, Marsal S, et al. Intravenous  
22 administration of expanded allogeneic adipose-derived mesenchymal stem cells in refractory rheumatoid  
23 arthritis (Cx611): results of a multicentre, dose escalation, randomised, single-blind, placebo-controlled  
24 phase Ib/IIa clinical trial. *Ann Rheum Dis*.2017;76:196-202.  
25  
26

27  
28 [24] Moniche F, Gonzalez A, Gonzalez-Marcos JR, Carmona M, Piñero P, Espigado I, et al. Intra-arterial  
29 bone marrow mononuclear cells in ischemic stroke: A pilot clinical trial. *Stroke*. 2012;43(8):2242–4.  
30  
31

32  
33 [25] Moniche F, Montaner J, Gonzalez-Marcos JR, Carmona M, Piñero P, Espigado I, et al. Intra-arterial  
34 bone marrow mononuclear cell transplantation correlates with GM-CSF, PDGF-BB, and MMP-2 Serum  
35 levels in stroke patients: Results from a clinical trial. *Cell Transplant* [Internet]. 2014;23(13):S57–64.  
36  
37 Available from: <https://doi.org/10.3727/096368914X684934>  
38  
39  
40  
41  
42  
43  
44  
45  
46  
47  
48  
49  
50  
51  
52  
53  
54  
55  
56  
57  
58  
59  
60



1  
2  
3  
4  
5  
6  
7  
8  
9  
10  
11  
12  
13  
14  
15  
16  
17  
18  
19  
20  
21  
22  
23  
24  
25  
26  
27  
28  
29  
30  
31  
32  
33  
34  
35  
36  
37  
38  
39  
40  
41  
42  
43  
44  
45  
46  
47  
48  
49  
50  
51  
52  
53  
54  
55  
56  
57  
58  
59  
60

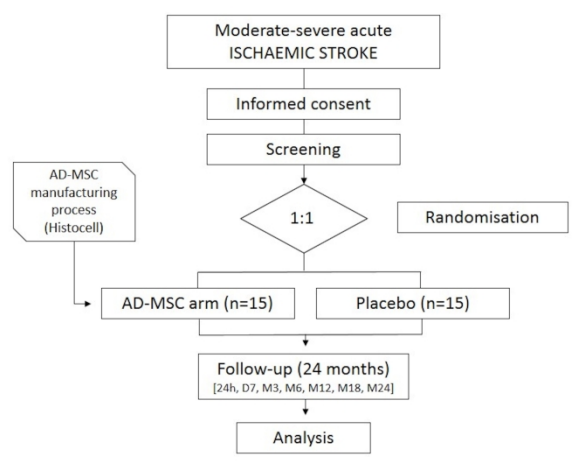

Schematic flowchart of the clinical trial

338x190mm (300 x 300 DPI)

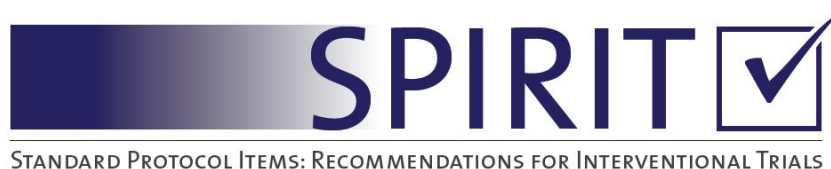

STANDARD PROTOCOL ITEMS: RECOMMENDATIONS FOR INTERVENTIONAL TRIALS

SPIRIT 2013 Checklist: Recommended items to address in a clinical trial protocol and related documents\*

| Section/item                      | Item No | Description                                                                                                                                                                                                                                                                                                |
|-----------------------------------|---------|------------------------------------------------------------------------------------------------------------------------------------------------------------------------------------------------------------------------------------------------------------------------------------------------------------|
| <b>Administrative information</b> |         |                                                                                                                                                                                                                                                                                                            |
| Title                             | 1       | Descriptive title identifying the study design, population, interventions, and, if applicable, trial acronym <b>(Page 1)</b>                                                                                                                                                                               |
| Trial registration                | 2a      | Trial identifier and registry name. If not yet registered, name of intended registry. <b>(NCT04280003. EudraCT: 2019-001724-35)</b>                                                                                                                                                                        |
|                                   | 2b      | All items from the World Health Organization Trial Registration Data Set (not applicable)                                                                                                                                                                                                                  |
| Protocol version                  | 3       | Date and version identifier <b>(5<sup>th</sup>May 2020, version 2)</b>                                                                                                                                                                                                                                     |
| Funding                           | 4       | Sources and types of financial, material, and other support <b>(On page 16)</b>                                                                                                                                                                                                                            |
| Roles and responsibilities        | 5a      | Names, affiliations, and roles of protocol contributors <b>(On page 1 and page 18).</b>                                                                                                                                                                                                                    |
|                                   | 5b      | Name and contact information for the trial sponsor <b>(Page 16).</b>                                                                                                                                                                                                                                       |
|                                   | 5c      | Role of study sponsor and funders, if any, in study design; collection, management, analysis, and interpretation of data; writing of the report; and the decision to submit the report for publication, including whether they will have ultimate authority over any of these activities <b>(Page 16).</b> |
|                                   | 5d      | Composition, roles, and responsibilities of the coordinating centre, steering committee, endpoint adjudication committee, data management team, and other individuals or groups overseeing the trial, if applicable (see Item 21a for data monitoring committee) <b>(Page 15).</b>                         |
| <b>Introduction</b>               |         |                                                                                                                                                                                                                                                                                                            |
| Background and rationale          | 6a      | Description of research question and justification for undertaking the trial, including summary of relevant studies (published and unpublished) examining benefits and harms for each intervention <b>(Pages 5-7)</b>                                                                                      |
|                                   | 6b      | Explanation for choice of comparators <b>(NA, placebo-controlled)</b>                                                                                                                                                                                                                                      |

|    |                                                                     |     |                                                                                                                                                                                                                                                                                                                                                                                                                  |
|----|---------------------------------------------------------------------|-----|------------------------------------------------------------------------------------------------------------------------------------------------------------------------------------------------------------------------------------------------------------------------------------------------------------------------------------------------------------------------------------------------------------------|
| 1  |                                                                     |     |                                                                                                                                                                                                                                                                                                                                                                                                                  |
| 2  | Objectives                                                          | 7   | Specific objectives or hypotheses ( <b>Pages 7-8</b> )                                                                                                                                                                                                                                                                                                                                                           |
| 3  |                                                                     |     |                                                                                                                                                                                                                                                                                                                                                                                                                  |
| 4  | Trial design                                                        | 8   | Description of trial design including type of trial (eg, parallel group, crossover, factorial, single group), allocation ratio, and framework (eg, superiority, equivalence, noninferiority, exploratory) ( <b>Page 7</b> )                                                                                                                                                                                      |
| 5  |                                                                     |     |                                                                                                                                                                                                                                                                                                                                                                                                                  |
| 6  |                                                                     |     |                                                                                                                                                                                                                                                                                                                                                                                                                  |
| 7  |                                                                     |     |                                                                                                                                                                                                                                                                                                                                                                                                                  |
| 8  |                                                                     |     |                                                                                                                                                                                                                                                                                                                                                                                                                  |
| 9  |                                                                     |     |                                                                                                                                                                                                                                                                                                                                                                                                                  |
| 10 | <b>Methods: Participants, interventions, and outcomes</b>           |     |                                                                                                                                                                                                                                                                                                                                                                                                                  |
| 11 |                                                                     |     |                                                                                                                                                                                                                                                                                                                                                                                                                  |
| 12 | Study setting                                                       | 9   | Description of study settings (eg, community clinic, academic hospital) and list of countries where data will be collected. Reference to where list of study sites can be obtained). ( <b>Page 7</b> )                                                                                                                                                                                                           |
| 13 |                                                                     |     |                                                                                                                                                                                                                                                                                                                                                                                                                  |
| 14 |                                                                     |     |                                                                                                                                                                                                                                                                                                                                                                                                                  |
| 15 |                                                                     |     |                                                                                                                                                                                                                                                                                                                                                                                                                  |
| 16 | Eligibility criteria                                                | 10  | Inclusion and exclusion criteria for participants. If applicable, eligibility criteria for study centres and individuals who will perform the interventions (eg, surgeons, psychotherapists) ( <b>Pages 8 and 9</b> )                                                                                                                                                                                            |
| 17 |                                                                     |     |                                                                                                                                                                                                                                                                                                                                                                                                                  |
| 18 |                                                                     |     |                                                                                                                                                                                                                                                                                                                                                                                                                  |
| 19 |                                                                     |     |                                                                                                                                                                                                                                                                                                                                                                                                                  |
| 20 |                                                                     |     |                                                                                                                                                                                                                                                                                                                                                                                                                  |
| 21 | Interventions                                                       | 11a | Interventions for each group with sufficient detail to allow replication, including how and when they will be administered ( <b>Page 13</b> )                                                                                                                                                                                                                                                                    |
| 22 |                                                                     |     |                                                                                                                                                                                                                                                                                                                                                                                                                  |
| 23 |                                                                     |     |                                                                                                                                                                                                                                                                                                                                                                                                                  |
| 24 |                                                                     | 11b | Criteria for discontinuing or modifying allocated interventions for a given trial participant (eg, drug dose change in response to harms, participant request, or improving/worsening disease) ( <b>Page 13</b> )                                                                                                                                                                                                |
| 25 |                                                                     |     |                                                                                                                                                                                                                                                                                                                                                                                                                  |
| 26 |                                                                     |     |                                                                                                                                                                                                                                                                                                                                                                                                                  |
| 27 |                                                                     |     |                                                                                                                                                                                                                                                                                                                                                                                                                  |
| 28 |                                                                     | 11c | Strategies to improve adherence to intervention protocols, and any procedures for monitoring adherence (eg, drug tablet return, laboratory tests) ( <b>NA for the study drug, single-doses during hospitalisation; monitoring and audit data on page 15</b> )                                                                                                                                                    |
| 29 |                                                                     |     |                                                                                                                                                                                                                                                                                                                                                                                                                  |
| 30 |                                                                     |     |                                                                                                                                                                                                                                                                                                                                                                                                                  |
| 31 |                                                                     |     |                                                                                                                                                                                                                                                                                                                                                                                                                  |
| 32 |                                                                     |     |                                                                                                                                                                                                                                                                                                                                                                                                                  |
| 33 |                                                                     |     |                                                                                                                                                                                                                                                                                                                                                                                                                  |
| 34 |                                                                     | 11d | Relevant concomitant care and interventions that are permitted or prohibited during the trial ( <b>Page 13</b> )                                                                                                                                                                                                                                                                                                 |
| 35 |                                                                     |     |                                                                                                                                                                                                                                                                                                                                                                                                                  |
| 36 |                                                                     |     |                                                                                                                                                                                                                                                                                                                                                                                                                  |
| 37 | Outcomes                                                            | 12  | Primary, secondary, and other outcomes, including the specific measurement variable (eg, systolic blood pressure), analysis metric (eg, change from baseline, final value, time to event), method of aggregation (eg, median, proportion), and time point for each outcome. Explanation of the clinical relevance of chosen efficacy and harm outcomes is strongly recommended. ( <b>Pages 7, 8, 10 and 11</b> ) |
| 38 |                                                                     |     |                                                                                                                                                                                                                                                                                                                                                                                                                  |
| 39 |                                                                     |     |                                                                                                                                                                                                                                                                                                                                                                                                                  |
| 40 |                                                                     |     |                                                                                                                                                                                                                                                                                                                                                                                                                  |
| 41 |                                                                     |     |                                                                                                                                                                                                                                                                                                                                                                                                                  |
| 42 |                                                                     |     |                                                                                                                                                                                                                                                                                                                                                                                                                  |
| 43 |                                                                     |     |                                                                                                                                                                                                                                                                                                                                                                                                                  |
| 44 |                                                                     |     |                                                                                                                                                                                                                                                                                                                                                                                                                  |
| 45 | Participant timeline                                                | 13  | Time schedule of enrolment, interventions (including any run-ins and washouts), assessments, and visits for participants. A schematic diagram is highly recommended (see Figure) ( <b>Pages 11-13</b> )                                                                                                                                                                                                          |
| 46 |                                                                     |     |                                                                                                                                                                                                                                                                                                                                                                                                                  |
| 47 |                                                                     |     |                                                                                                                                                                                                                                                                                                                                                                                                                  |
| 48 |                                                                     |     |                                                                                                                                                                                                                                                                                                                                                                                                                  |
| 49 |                                                                     |     |                                                                                                                                                                                                                                                                                                                                                                                                                  |
| 50 | Sample size                                                         | 14  | Estimated number of participants needed to achieve study objectives and how it was determined, including clinical and statistical assumptions supporting any sample size calculations ( <b>Page 14</b> )                                                                                                                                                                                                         |
| 51 |                                                                     |     |                                                                                                                                                                                                                                                                                                                                                                                                                  |
| 52 |                                                                     |     |                                                                                                                                                                                                                                                                                                                                                                                                                  |
| 53 |                                                                     |     |                                                                                                                                                                                                                                                                                                                                                                                                                  |
| 54 | Recruitment                                                         | 15  | Strategies for achieving adequate participant enrolment to reach target sample size ( <b>Page 8</b> )                                                                                                                                                                                                                                                                                                            |
| 55 |                                                                     |     |                                                                                                                                                                                                                                                                                                                                                                                                                  |
| 56 |                                                                     |     |                                                                                                                                                                                                                                                                                                                                                                                                                  |
| 57 |                                                                     |     |                                                                                                                                                                                                                                                                                                                                                                                                                  |
| 58 |                                                                     |     |                                                                                                                                                                                                                                                                                                                                                                                                                  |
| 59 | <b>Methods: Assignment of interventions (for controlled trials)</b> |     |                                                                                                                                                                                                                                                                                                                                                                                                                  |
| 60 |                                                                     |     |                                                                                                                                                                                                                                                                                                                                                                                                                  |

## Allocation:

- 1  
2  
3  
4 Sequence generation 16a Method of generating the allocation sequence (eg, computer-generated random numbers), and list of any factors for stratification. To reduce predictability of a random sequence, details of any planned restriction (eg, blocking) should be provided in a separate document that is unavailable to those who enrol participants or assign interventions (**Page 10**)
- 5  
6  
7  
8  
9  
10  
11  
12 Allocation concealment mechanism 16b Mechanism of implementing the allocation sequence (eg, central telephone; sequentially numbered, opaque, sealed envelopes), describing any steps to conceal the sequence until interventions are assigned (**Page 10**)
- 13  
14  
15  
16  
17  
18 Implementation 16c Who will generate the allocation sequence, who will enrol participants, and who will assign participants to interventions (**Pages 8 and 10**)
- 19  
20  
21 Blinding (masking) 17a Who will be blinded after assignment to interventions (eg, trial participants, care providers, outcome assessors, data analysts), and how (**Page 10**)
- 22  
23  
24  
25 17b If blinded, circumstances under which unblinding is permissible, and procedure for revealing a participant's allocated intervention during the trial (**specified in original protocol**)
- 26  
27  
28  
29

**Methods: Data collection, management, and analysis**

- 30  
31  
32 Data collection methods 18a Plans for assessment and collection of outcome, baseline, and other trial data, including any related processes to promote data quality (eg, duplicate measurements, training of assessors) and a description of study instruments (eg, questionnaires, laboratory tests) along with their reliability and validity, if known. Reference to where data collection forms can be found, if not in the protocol (**Page 10-11**)
- 33  
34  
35  
36  
37  
38  
39 18b Plans to promote participant retention and complete follow-up, including list of any outcome data to be collected for participants who discontinue or deviate from intervention protocols (**page 15**)
- 40  
41  
42  
43  
44 Data management 19 Plans for data entry, coding, security, and storage, including any related processes to promote data quality (eg, double data entry; range checks for data values). Reference to where details of data management procedures can be found, if not in the protocol (**Page 15**)
- 45  
46  
47  
48  
49  
50  
51 Statistical methods 20a Statistical methods for analysing primary and secondary outcomes. Reference to where other details of the statistical analysis plan can be found, if not in the protocol (**Page 14 and 15**)
- 52  
53  
54  
55 20b Methods for any additional analyses (eg, subgroup and adjusted analyses) (**Page 15**)
- 56  
57  
58  
59  
60

1  
2 20c Definition of analysis population relating to protocol non-adherence  
3 (eg, as randomised analysis), and any statistical methods to handle  
4 missing data (eg, multiple imputation) **(Page 15)**  
5

### 6 **Methods: Monitoring**

7  
8 Data monitoring 21a Composition of data monitoring committee (DMC); summary of its role  
9 and reporting structure; statement of whether it is independent from  
10 the sponsor and competing interests; and reference to where further  
11 details about its charter can be found, if not in the protocol.  
12 Alternatively, an explanation of why a DMC is not needed **(Page 15)**  
13

14  
15 21b Description of any interim analyses and stopping guidelines, including  
16 who will have access to these interim results and make the final  
17 decision to terminate the trial **(NA)**  
18

19 Harms 22 Plans for collecting, assessing, reporting, and managing solicited and  
20 spontaneously reported adverse events and other unintended effects  
21 of trial interventions or trial conduct **(Page 10)**  
22

23  
24 Auditing 23 Frequency and procedures for auditing trial conduct, if any, and  
25 whether the process will be independent from investigators and the  
26 sponsor **(Page 15)**  
27

### 28 **Ethics and dissemination**

29  
30 Research ethics 24 Plans for seeking research ethics committee/institutional review board  
31 approval **(Page 17)**  
32

33  
34 Protocol amendments 25 Plans for communicating important protocol modifications (eg,  
35 changes to eligibility criteria, outcomes, analyses) to relevant parties  
36 (eg, investigators, REC/IRBs, trial participants, trial registries, journals,  
37 regulators) **(specified in original protocol)**  
38

39  
40 Consent or assent 26a Who will obtain informed consent or assent from potential trial  
41 participants or authorised surrogates, and how (see Item 32) **(Page**  
42 **17)**  
43

44 26b Additional consent provisions for collection and use of participant data  
45 and biological specimens in ancillary studies, if applicable **(Not**  
46 **applicable)**  
47

48 Confidentiality 27 How personal information about potential and enrolled participants will  
49 be collected, shared, and maintained in order to protect confidentiality  
50 before, during, and after the trial **(Pages 13 and 15)**  
51

52  
53 Declaration of interests 28 Financial and other competing interests for principal investigators for  
54 the overall trial and each study site **(Page 16)**  
55

56 Access to data 29 Statement of who will have access to the final trial dataset, and  
57 disclosure of contractual agreements that limit such access for  
58 investigators **(Pages 15 and 18)**  
59  
60

|    |                   |     |                                                                              |
|----|-------------------|-----|------------------------------------------------------------------------------|
| 1  |                   |     |                                                                              |
| 2  | Ancillary and     | 30  | Provisions, if any, for ancillary and post-trial care, and for               |
| 3  | post-trial care   |     | compensation to those who suffer harm from trial participation               |
| 4  |                   |     | <b>(insurance provision, specified in original protocol)</b>                 |
| 5  |                   |     |                                                                              |
| 6  | Dissemination     | 31a | Plans for investigators and sponsor to communicate trial results to          |
| 7  | policy            |     | participants, healthcare professionals, the public, and other relevant       |
| 8  |                   |     | groups (eg, via publication, reporting in results databases, or other        |
| 9  |                   |     | data sharing arrangements), including any publication restrictions           |
| 10 |                   |     | <b>(Page 18)</b>                                                             |
| 11 |                   |     |                                                                              |
| 12 |                   | 31b | Authorship eligibility guidelines and any intended use of professional       |
| 13 |                   |     | writers                                                                      |
| 14 |                   |     |                                                                              |
| 15 |                   | 31c | Plans, if any, for granting public access to the full protocol, participant- |
| 16 |                   |     | level dataset, and statistical code <b>(Page 18)</b>                         |
| 17 |                   |     |                                                                              |
| 18 |                   |     |                                                                              |
| 19 |                   |     |                                                                              |
| 20 | <b>Appendices</b> |     |                                                                              |
| 21 |                   |     |                                                                              |
| 22 | Informed consent  | 32  | Model consent form and other related documentation given to                  |
| 23 | materials         |     | participants and authorised surrogates <b>(specified in original</b>         |
| 24 |                   |     | <b>protocol)</b>                                                             |
| 25 |                   |     |                                                                              |
| 26 | Biological        | 33  | Plans for collection, laboratory evaluation, and storage of biological       |
| 27 | specimens         |     | specimens for genetic or molecular analysis in the current trial and for     |
| 28 |                   |     | future use in ancillary studies, if applicable <b>(specified in original</b> |
| 29 |                   |     | <b>protocol)</b>                                                             |
| 30 |                   |     |                                                                              |

---

\*It is strongly recommended that this checklist be read in conjunction with the SPIRIT 2013 Explanation & Elaboration for important clarification on the items. Amendments to the protocol should be tracked and dated. The SPIRIT checklist is copyrighted by the SPIRIT Group under the Creative Commons "[Attribution-NonCommercial-NoDerivs 3.0 Unported](https://creativecommons.org/licenses/by-nc-nd/3.0/)" license.

# BMJ Open

## Allogeneic adipose tissue-derived mesenchymal stem cells in ischaemic stroke (AMASCIS-02): A phase IIb, multicentre, double-blind, placebo-controlled clinical trial protocol

|                                 |                                                                                                                                                                                                                                                                                                                                                                                                                                                                                                                          |
|---------------------------------|--------------------------------------------------------------------------------------------------------------------------------------------------------------------------------------------------------------------------------------------------------------------------------------------------------------------------------------------------------------------------------------------------------------------------------------------------------------------------------------------------------------------------|
| Journal:                        | <i>BMJ Open</i>                                                                                                                                                                                                                                                                                                                                                                                                                                                                                                          |
| Manuscript ID                   | bmjopen-2021-051790.R1                                                                                                                                                                                                                                                                                                                                                                                                                                                                                                   |
| Article Type:                   | Protocol                                                                                                                                                                                                                                                                                                                                                                                                                                                                                                                 |
| Date Submitted by the Author:   | 11-Jun-2021                                                                                                                                                                                                                                                                                                                                                                                                                                                                                                              |
| Complete List of Authors:       | de Celis-Ruiz, Elena; La Paz University Hospital Biomedical Research Foundation, Neurology<br>Fuentes, Blanca; La Paz University Hospital, Neurology<br>Moniche, Francisco; Virgen del Rocio University Hospital, Neurology<br>Montaner, J.; Virgen Macarena University Hospital, Neurology<br>Borobia, Alberto; La Paz University Hospital, Clinical Pharmacology<br>Gutiérrez-Fernández, M.; La Paz University Hospital, Neurology<br>Díez-Tejedor, Exuperio; Autonomous University of Madrid, Department of Neurology |
| <b>Primary Subject Heading</b>: | Neurology                                                                                                                                                                                                                                                                                                                                                                                                                                                                                                                |
| Secondary Subject Heading:      | Pharmacology and therapeutics                                                                                                                                                                                                                                                                                                                                                                                                                                                                                            |
| Keywords:                       | Stroke < NEUROLOGY, Clinical trials < THERAPEUTICS, Adverse events < THERAPEUTICS                                                                                                                                                                                                                                                                                                                                                                                                                                        |
|                                 |                                                                                                                                                                                                                                                                                                                                                                                                                                                                                                                          |

SCHOLARONE™  
Manuscripts

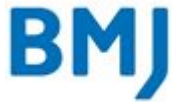

I, the Submitting Author has the right to grant and does grant on behalf of all authors of the Work (as defined in the below author licence), an exclusive licence and/or a non-exclusive licence for contributions from authors who are: i) UK Crown employees; ii) where BMJ has agreed a CC-BY licence shall apply, and/or iii) in accordance with the terms applicable for US Federal Government officers or employees acting as part of their official duties; on a worldwide, perpetual, irrevocable, royalty-free basis to BMJ Publishing Group Ltd ("BMJ") its licensees and where the relevant Journal is co-owned by BMJ to the co-owners of the Journal, to publish the Work in this journal and any other BMJ products and to exploit all rights, as set out in our [licence](#).

The Submitting Author accepts and understands that any supply made under these terms is made by BMJ to the Submitting Author unless you are acting as an employee on behalf of your employer or a postgraduate student of an affiliated institution which is paying any applicable article publishing charge ("APC") for Open Access articles. Where the Submitting Author wishes to make the Work available on an Open Access basis (and intends to pay the relevant APC), the terms of reuse of such Open Access shall be governed by a Creative Commons licence – details of these licences and which [Creative Commons](#) licence will apply to this Work are set out in our licence referred to above.

Other than as permitted in any relevant BMJ Author's Self Archiving Policies, I confirm this Work has not been accepted for publication elsewhere, is not being considered for publication elsewhere and does not duplicate material already published. I confirm all authors consent to publication of this Work and authorise the granting of this licence.



1 **Allogeneic adipose tissue-derived mesenchymal stem cells in ischaemic**  
2 **stroke (AMASCIS-02): A phase IIb, multicentre, double-blind,**  
3 **placebo-controlled clinical trial protocol**

4 E. de Celis-Ruiz, MD,\*<sup>1</sup> B. Fuentes, MD, PhD,\*<sup>1</sup> F. Moniche, MD, PhD,<sup>2</sup> J. Montaner, MD,  
5 PhD,<sup>3</sup> A. M. Borobia, MD, PhD,<sup>4</sup> M. Gutiérrez-Fernández, BiolD, PhD,<sup>1</sup> E. Díez-Tejedor<sup>1</sup> MD,  
6 PhD

7 Affiliation:

- 8 1. Department of Neurology and Stroke Centre, Neurosciences Area - IdiPAZ (Health Research  
9 Institute), La Paz University Hospital - Autonomous University of Madrid, Madrid, Spain
- 10 2. Department of Neurology, Virgen del Rocío University Hospital, Institute of Biomedicine of  
11 Seville, IBiS/Hospital Universitario Virgen del Rocío/CSIC, University of Seville, Seville, Spain
- 12 3. Department of Neurology, Virgen Macarena University Hospital, Institute of Biomedicine of  
13 Seville, IBiS/Hospital Universitario Virgen del Rocío/CSIC, University of Seville, Seville, Spain
- 14 4. Department of Clinical Pharmacology, IdiPAZ (Health Research Institute), La Paz University  
15 Hospital - Autonomous University of Madrid, Madrid, Spain

16  
17 \*Elena de Celis-Ruiz and Blanca Fuentes equally contributed in the elaboration of this  
18 manuscript

19 Corresponding authors:

20 -Prof Exuperio Díez Tejedor. Email address: [exuperio.diez@salud.madrid.org](mailto:exuperio.diez@salud.madrid.org)

21 -Dr Blanca Fuentes Gimeno. Email address: [blanca.fuentes@salud.madrid.org](mailto:blanca.fuentes@salud.madrid.org)

22 Address: La Paz University Hospital, General Building, Level 11, Neurology Department,  
23 Paseo de la Castellana 261, 28046, Madrid, Spain.

1  
2  
3  
4  
5  
6  
7  
8  
9  
10  
11  
12  
13  
14  
15  
16  
17  
18  
19  
20  
21  
22  
23  
24  
25  
26  
27  
28  
29  
30  
31  
32  
33  
34  
35  
36  
37  
38  
39  
40  
41  
42  
43  
44  
45  
46  
47  
48  
49  
50  
51  
52  
53  
54  
55  
56  
57  
58  
59  
60

1  
2  
3  
4  
5  
6  
7  
8  
9  
10  
11  
12  
13  
14  
15  
16  
17  
18  
19  
20  
21  
22  
23  
24  
25  
26  
27  
28  
29  
30  
31  
32  
33  
34  
35  
36  
37  
38  
39  
40  
41  
42  
43  
44  
45  
46  
47  
48  
49  
50  
51  
52  
53  
54  
55  
56  
57  
58  
59  
60

*Word count:* Abstract 241 words, text body without references, abbreviations and author affiliations 3880 words.

List of tables and figures:

- Table 1. Methods flowchart
- Figure 1. Schematic flowchart of the clinical trial

List of abbreviations:

- AD-MSCs: allogeneic adipose tissue-derived mesenchymal stem cells
- MSCs: mesenchymal stem cells
- CT: computed tomography
- MRI: magnetic resonance imaging
- NIHSS: National Institutes of Health Stroke Scale
- mRS: modified Rankin Scale
- AEs: Adverse events
- GM-CSF: Granulocyte-macrophage colony-stimulating factor
- PDGF-BB: platelet-derived growth factor BB
- BDNF: brain-derived neurotrophic factor
- VEGF: vascular endothelial growth factor
- TGF-1: transforming growth factor 1
- GFAP: endostatin, glial fibrillary acid protein
- MBP: myelin basic protein
- MMP-3: matrix metalloproteinase 3
- ECG: electrocardiogram
- SCReN: Spanish Clinical Research Network

- 1
  - 2
  - 3
  - 4
  - 5
  - 6
  - 7
  - 8
  - 9
  - 10
  - 11
  - 12
  - 13
  - 14
  - 15
  - 16
  - 17
  - 18
  - 19
  - 20
  - 21
  - 22
  - 23
  - 24
  - 25
  - 26
  - 27
  - 28
  - 29
  - 30
  - 31
  - 32
  - 33
  - 34
  - 35
  - 36
  - 37
  - 38
  - 39
  - 40
  - 41
  - 42
  - 43
  - 44
  - 45
  - 46
  - 47
  - 48
  - 49
  - 50
  - 51
  - 52
  - 53
  - 54
  - 55
  - 56
  - 57
  - 58
  - 59
  - 60
- 1 • IQR: interquartile range

For peer review only

1  
2  
3 **1 ABSTRACT**  
4  
5

6 **2 Introduction:** Stroke is a serious public health problem, given it is a major cause of disability  
7  
8 3 worldwide despite the spread of recanalization therapies. Enhancement of brain plasticity with  
9  
10 4 stem cell administration is a promising innovative therapy to reduce sequelae in these patients.  
11  
12 5 **Methods and analysis:** We have developed a phase IIb, multicentre, randomised, double-blind,  
13  
14 6 placebo-controlled clinical trial protocol to evaluate the safety and efficacy of intravenous  
15  
16 7 administration of allogeneic adipose tissue-derived mesenchymal stem cells (AD-MSCs) in  
17  
18 8 patients with acute ischaemic stroke, concurrently with conventional stroke treatment. Thirty  
19  
20 9 patients will be randomised on a 1:1 basis to receive either intravenous placebo or allogeneic  
21  
22 10 AD-MSCs as soon as possible within the first 4 days from stroke symptom onset. Patients will  
23  
24 11 be followed up to 24 months after randomisation. The primary objective is the safety assessment  
25  
26 12 of early intravenous administration of allogeneic AD-MSCs by reporting all adverse events and  
27  
28 13 neurological or systemic complications in both treatment groups. Secondary objectives assess  
29  
30 14 efficacy of early intravenous AD-MSC treatment in acute ischaemic stroke by evaluating  
31  
32 15 changes in the modified Rankin Scale and the National Institutes of Health Stroke Scale  
33  
34 16 throughout the follow-up period. In addition, brain repair biomarkers will be measured at  
35  
36 17 various visits.

37  
38  
39  
40 18 **Ethics and dissemination:** This clinical trial has been approved by the Clinical Research Ethics  
41  
42 19 Committee of La Paz University Hospital (Madrid, Spain) and by the Spanish Agency of  
43  
44 20 Medication and Health Products, and has been registered in Eudra CT (2019-001724-35) and  
45  
46 21 ClinicalTrials.gov (NCT04280003). Study results will be disseminated through peer-reviewed  
47  
48 22 publications in Open Access format and at conference presentations.  
49  
50

51 23  
52  
53  
54 24  
55  
56  
57 25  
58  
59  
60

1  
2  
3 **1 Strengths and limitations of this study**  
4  
5

- 6 2 • First multicentre clinical trial evaluating safety and possible efficacy of early  
7  
8 3 intravenous treatment with adipose derived mesenchymal stem cells in ischemic stroke.  
9  
10  
11 4 • The trial is designed as a randomised, placebo-controlled, double-blind study so biases  
12  
13 5 will be minimised, albeit limiting general population applicability.  
14  
15  
16 6 • Limitations for external validity are the fact that patients are recruited in a single  
17  
18 7 country from only 2 centres and the small sample size.  
19

20  
21 **8 KEY WORDS:** *Acute ischaemic stroke, Allogeneic adipose tissue-derived mesenchymal stem*  
22  
23 *cells, Clinical trial, Stem cell therapy, safety.*  
24  
25  
26  
27  
28  
29  
30  
31  
32  
33  
34  
35  
36  
37  
38  
39  
40  
41  
42  
43  
44  
45  
46  
47  
48  
49  
50  
51  
52  
53  
54  
55  
56  
57  
58  
59  
60

## 1 INTRODUCTION

2 Stroke is a serious health problem, given it is one of the most common causes of mortality and  
3 the leading cause of disability due to neurologic diseases worldwide. In 2016, the global  
4 estimated incidence of stroke ranged between 189 and 218 cases per 100,000 inhabitants.[1] A  
5 large proportion of patients with ischaemic stroke have persistent neurological deficits that  
6 impair their daily life activities, and many also experience non-neurological complications, such  
7 as pulmonary and urinary tract infections, deep vein thrombosis and depression. In the last 2  
8 decades, there has been a breakthrough in ischaemic stroke treatments. However, currently  
9 available therapies, such as intravenous thrombolysis and mechanical thrombectomy, focus only  
10 on reperfusion in the acute phase and are not accessible to all patients due to a narrow time  
11 window and eligibility issues. Furthermore, these cerebral reperfusion-based therapies cannot  
12 reverse established ischaemic injury or reduce its sequelae. Therefore, to reduce the burden of  
13 this disease, there is an urgent need for therapies that can enhance patient recovery after stroke.

14 After a brain injury, several interrelated mechanisms, such as neurogenesis, gliogenesis,  
15 oligodendrogenesis, synaptogenesis and angiogenesis take place to repair the damaged tissue. In  
16 clinical practice, these processes are stimulated through rehabilitation therapies; however, cell  
17 therapies promote tissue repair exogenously,[2] which could complement current reperfusion  
18 treatments for acute ischaemic stroke.

19 Stem cells are immature cells with the capacity to differentiate into diverse cell lines. At  
20 present, challenges concerning the most suitable cell type, route and time of administration are  
21 the main issues for progression from preclinical studies to the design of clinical trials.[3-5]

22 Regarding the route of administration, preclinical studies have shown that it is not mandatory  
23 for stem cells to migrate and nest at the injury site to achieve functional recovery after stroke,  
24 given their therapeutic effect is also due to secretion of trophic factors and modulation of the  
25 immune response.[5,6] Intravenous administration has been proven to be noninferior to other  
26 routes in preclinical studies, such as in intracerebral, intrathecal or intra-arterial deliveries, and it

1 is far less invasive. Regarding cell type, preclinical and initial clinical trial data [5,7,8,9,10,11]  
2 suggest that mesenchymal stem cells (MSCs) constitute a safe and possibly effective therapy in  
3 ischaemic stroke. Allogeneic MSCs lack human leucocyte antigen-class II molecules, avoiding  
4 the risk of rejection and allowing short timings of administration.

5 Most studies concerning cell therapies in ischaemic stroke have been performed in chronic  
6 stages of the disease, although data from preclinical studies as well as the recent MASTERS  
7 trial suggest their early administration could be more effective. In the MASTERS trial,[12]  
8 intravenous administration of multipotent adult progenitor cells in patients with acute ischaemic  
9 stroke did not provoke any safety concerns or administration issues, and a tendency towards  
10 better functional recovery in the early treatment arm (<36 h from symptom onset instead of 36–  
11 48 h) versus placebo was observed. This observation was also supported by the fact that the  
12 trophic factors released during the acute phase after stroke inhibited the first steps of the  
13 ischaemic cascade and enhanced brain protection mechanisms.[3,13,14]

14 Adipose tissue-derived mesenchymal stem cells (AD-MSCs) are abundant, accessible and easy  
15 to obtain by lipoaspiration techniques;[15,16] they also can be administered without ethical  
16 concerns.[13] Their intravenous administration has been proven safe in rat models of ischaemic  
17 stroke and has also been associated with good functional recovery, reductions in cell death and  
18 increased cell proliferation at the peri-infarct zone without observed implantation of the AD-  
19 MSCs at the infarct site.[17, 18] To our knowledge, the first clinical trial assessing the safety  
20 and efficacy of intravenous administration of allogeneic AD-MSCs in patients with ischaemic  
21 stroke is the AMASCIS-01 trial (NCT01678534),[19] which has been performed by our study  
22 group. Although the 2-year follow-up results have not yet been published, a safety interim  
23 analysis at 6 months showed no safety concerns when the AD-MSCs were administered within  
24 the first 2 weeks after symptom onset.[20] Other case reports and clinical trials exploring this  
25 cell type in non-ischemic neurological diseases [21] and non-neurological diseases, such as in  
26 acute respiratory distress and refractory rheumatoid arthritis, have also shown no safety issues  
27 compared with the placebo group.[22, 23] .

1  
2  
3 1 In preclinical studies, the MSC dose in ischaemic stroke animal models has been variable, being  
4  
5 2 between  $10^4$ - $4.3 \times 10^7$  MSCs/kg.[7-10] Results appear more beneficial for lower rather than  
6  
7 3 higher cell doses, which could be due to the fact that higher doses could potentially provoke a  
8  
9 4 brain embolus or slow cerebral blood flow.[9] Our study group has used doses of  $1$ - $2 \times 10^6$   
10  
11 5 cells/kg in preclinical studies without issue. In the MASTERS trial, a single intravenous total  
12  
13 6 dose of  $4$  or  $12 \times 10^8$  multipotent adult progenitor cells did not cause any safety issues. In the  
14  
15 7 AMASCIS-01 trial performed by our study group, a single dose of  $10^6$  AD-MSCs/kg was  
16  
17 8 administered intravenously, also without safety concerns.

18  
19  
20 9 Therefore, in the AMASCIS-02 trial, we aim to show the safety of early allogeneic AD-MSC  
21  
22 10 intravenous administration ( $10^6$  cells/kg of the patient's weight within the first 4 days from  
23  
24 11 stroke onset) and explore the possible efficacy of this therapy in reducing stroke-associated  
25  
26 12 disability.

## 27 28 29 30 13 **MATERIALS AND METHODS**

### 31 32 14 **Design**

33  
34  
35 15 The Allogeneic Adipose Tissue derived Mesenchymal Stem Cells in Ischemic Stroke  
36  
37 16 (AMASCIS-02) study is an academic, randomised, double-blind, placebo-controlled multicentre  
38  
39 17 clinical trial. The two recruiting centres are La Paz University Hospital and Virgen del Rocío  
40  
41 18 University Hospital, both of them in Spain. EudraCT: 2019-001724-35. The study is registered  
42  
43 19 at <http://www.clinicaltrials.gov> and identified by NCT04280003.

44  
45  
46 20 Recruitment began on January 2021, and the estimated end date is July 2023.

### 47 48 49 50 21 **Primary objective**

51  
52  
53 22 To assess the safety of intravenous administration of allogeneic AD-MSCs within the first 4  
54  
55 23 days from stroke onset in patients with acute ischaemic stroke.

56  
57  
58 24



## 1 **Secondary objective**

- 2  
3  
4  
5  
6  
7  
8  
9
- 2 To assess potential efficacy of allogeneic AD-MSCs when administered within the first 4 days  
3 from stroke onset in patients with acute ischaemic stroke.

## 4 **Eligibility**

5 Patients will be selected from the Neurology Department of both of the study centres. Acute  
6 stroke management of all patients will follow standard of care. Reperfusion therapies such as  
7 intravenous fibrinolysis and mechanical thrombectomy are allowed prior to patient screening  
8 and randomisation as long as all study inclusion and no exclusion criteria are met after their  
9 application. Inclusion and exclusion criteria are as follows:

### 10 • **Inclusion criteria**

- 11  
12  
13  
14  
15  
16  
17  
18  
19  
20  
21  
22  
23  
24
1. Men and women aged older than 18 years with acute ischaemic stroke.
  2. Treatment within 4 days (+/- 1 day) from the onset of stroke symptoms or from the last time observed as asymptomatic.
  3. A computed tomography (CT) or magnetic resonance imaging (MRI) scan compatible with the clinical diagnosis of acute nonlacunar ischaemic stroke in the region of the middle cerebral artery.
  4. A score on the National Institutes of Health Stroke Scale (NIHSS) of 8–20, with at least 2 of these points in sections 5 and 6 (motor deficit) at the time of inclusion. NIHSS evaluation for screening of these patients will take place after finalization of reperfusion therapies (if they have been performed) providing that the clinical condition of the patient is stable with no prevision of immediate recovery. A measurable focal neurologic disability must persist to the time of treatment administration.

1  
2  
3  
4  
5  
6  
7  
8  
9  
10  
11  
12  
13  
14  
15  
16  
17  
18  
19  
20  
21  
22  
23  
24  
25  
26  
27  
28  
29  
30  
31  
32  
33  
34  
35  
36  
37  
38  
39  
40  
41  
42  
43  
44  
45  
46  
47  
48  
49  
50  
51  
52  
53  
54  
55  
56  
57  
58  
59  
60

- 1 5. A prestroke score on the modified Rankin Scale (mRS)  $\leq 1$  (no  
2 significant disability).
- 3 6. Women with non-childbearing potential must have either (at least 1  
4 criterion)  
5 -Undergone a hysterectomy and/or bilateral oophorectomy;  
6 -Have medically confirmed ovarian failure; or  
7 -Achieved postmenopausal status: cessation of regular menses for at  
8 least 12 consecutive months with no alternative cause.
- 9 7. Women with childbearing potential need a negative pregnancy test and  
10 must agree to use adequate contraception during the duration of the  
11 study.
- 12 8. Signed informed consent.

13 • **Exclusion criteria**

- 14 1. Comatose patients ( $\geq 2$  score on item 1a of the NIHSS, related to degree  
15 of awareness).
- 16 2. Evidence on neuroimaging of brain tumour, cerebral oedema with  
17 midline shift and a clinically significant compression of ventricles,  
18 cerebellar or brainstem infarction and intraventricular, intracerebral or  
19 subarachnoid haemorrhage. Small petechial haemorrhages are not  
20 exclusion criteria.
- 21 3. Current drug or alcohol dependence.
- 22 4. Active infectious disease, including human immunodeficiency virus and  
23 hepatitis B and C. A controlled infection is not an exclusion criterion.
- 24 5. Pre-existing dementia.
- 25 6. A health status, clinical condition or other characteristics that preclude  
26 appropriate diagnosis, treatment or follow-up in the trial.

1  
2  
3  
4  
5  
6  
7  
8  
9  
10  
11  
12  
13  
14  
15  
16  
17  
18  
19  
20  
21  
22  
23  
24  
25  
26  
27  
28  
29  
30  
31  
32  
33  
34  
35  
36  
37  
38  
39  
40  
41  
42  
43  
44  
45  
46  
47  
48  
49  
50  
51  
52  
53  
54  
55  
56  
57  
58  
59  
60

- 1 7. Inability or unwillingness of the individual or their representative to
- 2 provide written informed consent.
- 3 8. Participation in another clinical trial.

#### 4 **Randomisation**

5 Each patient will have a unique number assigned sequentially as they enter the study. The  
6 randomisation sequence was created using SAS version 9.4 statistical software (procedure  
7 'PROC PLAN') with a 1:1 allocation. No randomisation seed was specified. The randomisation  
8 seed was generated taking the hour of the computer when the program was executed.  
9 Randomisation will be stratified by age (<65 years or ≥65 years). After verifying the inclusion  
10 and exclusion criteria, patients will be assigned the study drug or a placebo solution.

#### 11 **Masking**

12 The study is double-blind. After a patient is randomised by a blinded member of the research  
13 team, a nonblinded research member will request the corresponding study medication according  
14 to the randomisation code. The study medication and the placebo solution will be  
15 indistinguishable, and masking will be made by the nonblinded research team members.

#### 16 **Outcomes**

17 *Principal variables.* The safety of AD-MSCs will be assessed using the following parameters:

- 18 • Adverse events (AEs) reported spontaneously by the patient or in response to questions not
- 19 addressed, and serious AEs (death, life-threatening events, events that require inpatient
- 20 hospitalisation or prolongation of existing hospitalisation, events that result in persistent or
- 21 significant disability, congenital anomalies or any other event that does not meet the
- 22 definitions above but can be considered potentially serious).

- 1  
2  
3 1 • Neurological and systemic complications (including abnormal laboratory values):  
4  
5 2 deteriorating stroke, stroke recurrences, brain oedema, seizures, haemorrhagic  
6  
7 3 transformation, respiratory infections, urinary tract infections, deep venous thrombosis and  
8  
9 4 pulmonary embolism.  
10

11 5  
12  
13 6 *Secondary variables.* The efficacy of intravenous treatment with AD-MSCs will be assessed  
14  
15 7 using the following parameters:  
16

- 17 8  
18  
19  
20 9 • Modified Rankin Scale (mRS): The outcome will be considered positive when the  
21  
22 10 patient obtains a score of 0–3, measured at months 3, 6, 12 and 24. An additional  
23  
24 11 exploratory efficacy analysis will consider mRS shift at months 3, 6, 12 and 24.  
25  
26 12 • National Institutes of Health Stroke Scale (NIHSS): Measured at all scheduled visits. A  
27  
28 13 successful outcome will occur with an improvement of 75% or more from the baseline  
29  
30 14 score. An additional exploratory efficacy analysis will measure differences in the  
31  
32 15 median (interquartile range [IQR]) distribution and in the frequency of an NIHSS  $\leq 1$   
33  
34 16 between groups.  
35  
36 17 • Biomarker measurement: Granulocyte-macrophage colony-stimulating factor (GM-  
37  
38 18 CSF), platelet-derived growth factor BB (PDGF-BB), brain-derived neurotrophic factor  
39  
40 19 (BDNF), vascular endothelial growth factor (VEGF), transforming growth factor 1  
41  
42 20 (TGF-1), endostatin, glial fibrillary acid protein (GFAP), myelin basic protein (MBP),  
43  
44 21 matrix metalloproteinase 3 (MMP-3) and extracellular vesicles will be measured at  
45  
46 22 baseline, day 7 and month 3 after treatment administration.  
47  
48  
49

### 50 23 **Study procedures**

51  
52  
53 24 After initial screening and randomisation (visit 1) takes place, the study treatment will be  
54  
55 25 administered within the first four days since stroke symptom onset (visit 2). Eight more visits  
56  
57 26 will take place during the 24 month follow-up period (2h, 24h, 7 days or hospital discharge, 3,  
58  
59 27 6, 12, 18 and 24 months since treatment administration) to assess security and efficacy measures  
60

1 (see table 1 for details of study visits and procedures and figure 1 for schematic flowchart of the  
 2 clinical trial design).

3 **Table 1. Flowchart of study visits and procedures**

| FLOWCHART                                                                    | Visit 1          | Visit 2            | Visit 3 | Visit 4 | Visit 5                                 | Visit 6       | Visit 7       | Visit 8        | Visit 9        | Visit 10       |
|------------------------------------------------------------------------------|------------------|--------------------|---------|---------|-----------------------------------------|---------------|---------------|----------------|----------------|----------------|
|                                                                              | Screening        | Baseline<br>0 h    | 2h      | 24 h    | Day 7 or<br>Discharge <sup>d</sup><br>) | M3<br>(±14 d) | M6<br>(±14 d) | M12<br>(±14 d) | M18<br>(±14 d) | M24<br>(±14 d) |
| Informed consent signature                                                   | X                |                    |         |         |                                         |               |               |                |                |                |
| Inclusion and exclusion criteria                                             | X                | X <sup>(2,3)</sup> |         |         |                                         |               |               |                |                |                |
| Past medical/surgical history Physical examination                           | X                |                    |         |         |                                         |               |               |                |                |                |
| Pregnancy test                                                               | X                |                    |         | X       | X                                       | X             | X             | X              | X              | X              |
| NIHSS                                                                        | X                | X <sup>(3)</sup>   | X       | X       | X                                       | X             | X             | X              | X              | X              |
| Modified Rankin Scale                                                        | X                |                    |         |         | X                                       | X             | X             | X              | X              | X              |
| Blood pressure                                                               | X                | X <sup>(3)</sup>   | X       | X       | X                                       |               |               |                |                |                |
| Heart rate                                                                   | X                | X <sup>(3)</sup>   | X       | X       | X                                       |               |               |                |                |                |
| Body temperature                                                             | X                | X <sup>(3)</sup>   | X       | X       | X                                       |               |               |                |                |                |
| Oxygen saturation                                                            | X                | X <sup>(3)</sup>   | X       | X       | X                                       |               |               |                |                |                |
| Capillary blood glucose                                                      | X                | X <sup>(3)</sup>   | X       | X       | X                                       |               |               |                |                |                |
| 12-lead ECG                                                                  | X                | X <sup>(3)</sup>   |         | X       |                                         |               |               |                |                | X              |
| Neuroimaging (brain CT)                                                      | X <sup>(1)</sup> |                    |         |         |                                         |               |               |                |                |                |
| Neuroimaging (brain MRI)                                                     | X <sup>(1)</sup> |                    |         |         |                                         |               |               |                |                |                |
| Randomisation                                                                | X                |                    |         |         |                                         |               |               |                |                |                |
| Study drug administration                                                    |                  | X                  |         |         |                                         |               |               |                |                |                |
| Laboratory assessments:<br>Haematology, coagulation test and<br>biochemistry | X                |                    |         | X       | X                                       |               |               |                |                | X              |
| Blood brain repair markers                                                   |                  | X <sup>(3)</sup>   |         |         | X                                       | X             |               |                |                |                |
| Adverse events register                                                      |                  | X <sup>(3)</sup>   | X       | X       | X                                       | X             | X             | X              | X              | X              |
| Concomitant drugs                                                            | X                | X <sup>(3)</sup>   | X       | X       | X                                       | X             | X             | X              | X              | X              |

4 NIHSS: National Institutes of Health Stroke Scale; ECG: electrocardiogram; CT: computed tomography;  
 5 MRI: magnetic resonance imaging.

6 <sup>(1)</sup> Review Neuroimaging (one of them, CT or MRI); <sup>(2)</sup> Review selection criteria; <sup>(3)</sup> Tests, measurements,  
 7 register of adverse events and study drug administration and also revision of inclusion and exclusion  
 8 criteria will take place before study drug administration. <sup>(4)</sup> Visit 5 is performed at day 7 after study  
 9 drug administration or at hospital discharge if it takes place before day 7.

## 1 **Treatment or intervention**

2 All study medications will be industrially manufactured, tested and released according to  
3 current Good Manufacturing Practice Guidelines by Histocell. The experimental drug is an  
4 intravenous solution of allogeneic AD-MSCs in a concentration of 10 million cells per millilitre,  
5 obtained from a donor by *in vitro* cell culture techniques, conditioned in cryovials of Type I  
6 sterile borosilicate glass (with ringer lactate, glucosaline, sodium bicarbonate and human  
7 albumin 20% as excipients) and cryopreserved at  $-150^{\circ}$  C. The manufacturing process is  
8 detailed in the investigator's brochure, which has been approved by the Spanish Agency of  
9 Medicines and Health products. The placebo solution has the same appearance as the study drug  
10 and is formed by its excipients. Medication vials containing either solution will be dissolved in  
11 50ml of physiologic saline solution and dispensed as a single intravenous drop administration in  
12 approximately 30 minutes, at a dose of 1 million cells per kg of the patient's weight (for the  
13 AD-MSCs).

## 14 **Discontinuation of study medication**

15 The study medication must be discontinued if a suspected anaphylactic reaction or serious  
16 adverse event occurs during its administration or if patient participation consent is withdrawn.

## 17 **Standard treatments for the management of acute stroke**

18 All patients will be managed according to current guidelines for acute stroke management,  
19 including treatment with recanalization therapies such as intravenous thrombolysis, mechanical  
20 thrombectomy or both.

## 21 **Data collection and outcome measures**

22 An electronic case report form has been designed using MACRO. This system will maintain  
23 patient anonymity, and the data will be transferred to a '\*.csv' file to analyse it with R software  
24 (3.5.2 version or newer). To ensure the quality of the data, data management will be performed  
25 by the Spanish Clinical Research Network (SCReN). The data management plan has been

1 approved by the principal investigator and the sponsor. Data collection forms will be included in  
2 the final report.

### 3 **Sample size estimates**

4 Given this is a pilot phase II clinical trial focused on the assessment of safety, no systematic  
5 sample size calculation applies. Based on the previous clinical trial, AMASCIS-01  
6 (NCT01678534 and EudraCT: 2011-003551-18), it seems feasible to recruit 30 patients  
7 between the 2 participating centres.

### 8 **Statistical analyses**

9 Demographic and clinical characteristics will be summarised in terms of means and standard  
10 deviations, median and IQR or relative frequency as appropriate for each variable type. A  
11 univariate approach will be employed for calculating nonparametric tests for the continuous  
12 variables (Wilcoxon rank sum), and Fisher's or a chi-squared test will be employed for the  
13 categorical variables. Given the binary nature of the primary outcome, a logistic regression  
14 under the minimum Akaike information criterion using all available variables will be fitted to  
15 the data, estimating odds ratios and their confidence intervals. Rules of prediction for the binary  
16 outcome will be performed using receiver operating characteristic curves and k-fold cross-  
17 validation procedures. Only *P* values less than 0.05 will be considered significant. Statistical  
18 computations will be calculated using the statistical computing environment R. The statistical  
19 analysis will be performed by the personnel from the Clinical Pharmacology Service and  
20 Central Unit of Clinical Investigation and Clinical Trials. The safety analysis will include tables  
21 with all AEs and neurological and systemic complications. A descriptive analysis summarising  
22 efficacy variables in each group will be performed and an exploratory analysis will be  
23 conducted by comparing both treatment groups using the Wilcoxon rank sum test or Student's *t*-  
24 test.

25

1  
2  
3 1 *Plans for predefined subgroup analyses:*  
4  
5

6 2 1) The “intention to treat” population will consist of all patients for whom baseline variables  
7  
8 3 and at least 1 value of a principal or secondary variable are available. If a final visit variable is  
9  
10 4 not obtained for a patient, it will be replaced by the last available value (LOCF=Last  
11  
12 5 Observation Carried Forward).

13  
14  
15 6 2) The “per protocol” population will consist of all patients for whom infusion of the study  
16  
17 7 medication had been started with no major protocol violation.

18  
19  
20 8 3) The “safety analysis population” will consist of all patients for whom infusion of the study  
21  
22 9 medication had been started.

23  
24  
25 10 **Data monitoring body**

26  
27 11 Coordination, management, monitoring, data management and the statistical analysis will be  
28  
29 12 performed by the SCReN.

30  
31  
32 13 **Auditing**

33  
34  
35 14 During the progress of the study, audit visits may be conducted at the participating centres. The  
36  
37 15 investigator will allow direct access to the source data/documents for monitoring, auditing,  
38  
39 16 review by the ethical research committee and inspection by the health authorities.

40  
41  
42 17 **Patient and Public Involvement**

43  
44  
45 18 The development of the research objectives and outcomes are based on the neurologist’s  
46  
47 19 experience treating this profile of patients and the desire to optimise brain tissue repair  
48  
49 20 therapies. Patients and their advisors were not involved in the design, recruitment or conduct of  
50  
51 21 this study.

52  
53  
54 22 **SUMMARY**

55  
56  
57 23 AD-MSCs administered intravenously in the first days from stroke symptom onset could be a  
58  
59 24 safe and promising therapy to enhance recovery from brain ischaemia and to help reduce  
60



1 disability. This type of cell therapy has already demonstrated its efficacy and safety in  
2 preclinical research, but further studies are needed to prove similar results in patients with  
3 stroke. The advantages of AD-MSCs over other cell types are their accessibility and abundance,  
4 as well as their low immunogenicity. An intravenous infusion appears to be the most  
5 appropriate manner of administration, given it is the least aggressive, and cell therapies can be  
6 performed by modification of trophic factors and immunomodulation.

7 This clinical trial aims to demonstrate that early intravenous administration of AD-MSCs has no  
8 major safety complications and that it could possibly reduce disability due to stroke. Also,  
9 analysis of blood biomarkers and trophic factors will help elucidate and deepen our  
10 understanding of the mechanisms of action of cell therapy, along with previous results from  
11 other clinical trials.[24,25] The results of the AMASCIS-02 trial, together with those from the  
12 AMASCIS-01 trial, will increase our knowledge of the safety of intravenous AD-MSC  
13 administration in patients with ischaemic stroke. We will then be able to conduct larger clinical  
14 trials to evaluate their efficacy and possibly enable their use in clinical practice in the near  
15 future.

## 16 **DECLARATIONS**

### 17 **Competing Interests**

18 There are no competing interests for any author.

### 19 **Funding**

20 This clinical trial has been promoted by the La Paz University Hospital Institute for Health  
21 Research – IdiPAZ (La Paz University Hospital – Autonomous University of Madrid) and  
22 sponsored from a competitive grant from the Carlos III Health Institute Health Care Research  
23 Fund, and co-funded by the European Regional Development Fund (ERDF) “A way to make  
24 Europe”/”Investing in your future” (PIC18/00016). This clinical trial has been supported by  
25 Plataforma Española de Investigación Clínica y Ensayos Clínicos, SCReN (Spanish Clinical

1  
2  
3 1 Research Network), funded by Carlos III Health Institute-General Subdirection for Evaluation  
4  
5 2 and Promotion of Research, State Plan for Scientific Investigation, Technology and Innovation  
6  
7 3 (2017–2020) and co-funded by European Regional Development Fund/European Social fund  
8  
9 4 “A way to make Europe”/“Investing in your future” (grant ID PT17/0017/0013). The Funders  
10  
11 5 and Sponsor will not interfere in the selection processes of patients, analysis of data and/or  
12  
13 6 publication of the results, or in any other process that might interfere with the results of the  
14  
15 7 study. Funding will be independent of the results of the study. The Principal Investigator has  
16  
17 8 ultimate authority over any of these activities.

## 9 **Ethics and dissemination**

10 Research ethics approval: The researchers will adhere strictly to the provisions of this protocol  
11 and will complete the case report forms. The study will be performed according to the  
12 recommendations for clinical studies and the evaluation of drugs in humans, as contained in the  
13 Declaration of Helsinki (revised in successive world assemblies) and in the current Spanish and  
14 European legislation on clinical studies and patient data confidentiality. The study will follow  
15 the principles of Good Clinical Practice. This study (ID 5528, protocol version 2, dated 5 May  
16 2020) has been approved by the Clinical Research Ethics Committee of La Paz University  
17 Hospital (Madrid, Spain) and by the Spanish Agency of Medication and Health Products, and  
18 has been registered in Eudra CT (2019-001724-35) and ClinicalTrials.gov (NCT04280003).

19 Protocol amendments: All protocol amendments will be evaluated by the Ethics Committee and  
20 the Spanish Agency of Medication and Health Products, following the principles of Good  
21 Clinical Practice and national legislation. All modifications of the study protocol will be  
22 communicated by updating the trial registry at ClinicalTrials.gov (NCT04280003).

23 Consent to participate: Informed consent will be obtained by a recruiting investigator for all  
24 individual participants included in this study, or by their family member/representative (if the  
25 patient has aphasia or altered consciousness at that moment). Re-consent from the patient will  
26 be obtained whenever possible if initial consent was provided by family

1 members/representatives. The informed consent document is written in Spanish. The informed  
2 consent documents are available as supplementary files.

3 Consent for publication: According to the Royal Decree 1090/2015, the results of this clinical  
4 trial will be published once the study is completed in an Open Access format.

5 Confidentiality: All participant information as well as the electronic database will remain in  
6 secure storage at both study centres during the trial and up to 25 years after its finalisation.

7 Access to data: All investigators and each centres' monitor will have access to the electronic  
8 trial data during the data collection period; after completion of the study, the data will also be  
9 accessible to statisticians. Only the blinded study nurses and Histocell will have access to  
10 randomisation codes until the data collection period is complete.

11 Availability of data and material: Data will be available from the corresponding author on  
12 reasonable request, if it is considered compliant with the General Data Protection Regulation  
13 and the data-sharing agreement is approved by the relevant Spanish authorities. Upon study  
14 finalisation, anonymised individual patient data will be available on a public repository of the  
15 Community of Madrid.

16 Ancillary and post-trial care: Patients will be treated during and after the clinical trial is  
17 completed with the best medical treatments according to the state of the art. Participants will not  
18 receive economic benefits beyond compensation from the study insurance company in cases of  
19 study treatment-related adverse events (Hannover seguros España).

20 Dissemination policy: Output from this study will include journal publications, conference  
21 presentations and community reporting. Output will not identify participants.

## 22 **Authors' contributions**

23 The first draft of the manuscript was written by Elena de Celis-Ruiz, and all authors commented  
24 on previous versions of the manuscript. Blanca Fuentes, Exuperio Díez-Tejedor, Francisco

1  
2  
3  
4  
5  
6  
7  
8  
9  
10  
11  
12  
13  
14  
15  
16  
17  
18  
19  
20  
21  
22  
23  
24  
25  
26  
27  
28  
29  
30  
31  
32  
33  
34  
35  
36  
37  
38  
39  
40  
41  
42  
43  
44  
45  
46  
47  
48  
49  
50  
51  
52  
53  
54  
55  
56  
57  
58  
59  
60

1 Moniche, Joan Montaner, Alberto Borobia and María Gutiérrez-Fernández participated in the  
2 study conception and design. All authors have read and approved the final manuscript.

For peer review only

## 1 REFERENCES

- 2 [1] GBD 2016 Neurology Collaborators. Global, regional, and national burden of neurological disorders,  
3 1990-2016: a systematic analysis for the Global Burden of Disease Study 2016. *Lancet Neurol.*  
4 2019;18(5):459
- 5 [2] Gutiérrez-Fernández M, Fuentes B, Rodríguez-Frutos B, Ramos-Cejudo J, Vallejo-Cremades MT,  
6 Díez-Tejedor E. Trophic factors and cell therapy to stimulate brain repair after ischaemic stroke. *J Cell*  
7 *Mol Med.* 2012;16:2280-90.
- 8 [3] Bang OY, Kim H, Cha M, Moon J. Adult Stem Cell Therapy for Stroke: Challenges and Progress. *J*  
9 *Stroke.* 2016;18:256-66.
- 10 [4] Krause M, Phan TG, Ma H, Sobey CG, Lim R. Cell-Based Therapies for Stroke: Are We There Yet?  
11 *Front Neurol.* 2019;Jun 25;10:656
- 12 [5] Rodríguez-Frutos B, Otero-Ortega L, Gutierrez-Fernández M, Fuentes B, Ramos-Cejudo, Díez-  
13 Tejedor E. Stem Cell Therapy and Administration Routes After Stroke. *Transl Stroke Res* 2016;7:378-87.
- 14 [6] Savitz SI. Developing Cellular Therapies for Stroke. *Stroke.* 2015;46:2026-31
- 15 [7] Vu Q, Xie K, Eckert M, Zhao W, Cramer SC. Meta-analysis of preclinical studies of mesenchymal  
16 stromal cells for ischemic stroke. *Neurology.* 2014;82:1277-86
- 17 [8] Lalu MM, Montroy J, Dowlatshahi D, Hutton B, Juneau P, Wesch N, et al. From the Lab to Patients a  
18 Systematic Review and Meta-Analysis of Mesenchymal Stem Cell Therapy for Stroke. *Transl Stroke Res.*  
19 2020 Jun;11(3):345-364
- 20 [9] Sarmah D, Agrawal V, Rane P, Bhute S, Watanabe M, Kalia K, et al. Mesenchymal Stem Cell  
21 Therapy in Ischemic Stroke: A Meta-analysis of Preclinical Studies. *Clin Pharmacol Ther.*  
22 2018;103(6):990-8.
- 23 [10]. Cui L li, Golubczyk D, Tolppanen AM, Boltze J, Jolkkonen J. Cell therapy for ischemic stroke: Are  
24 differences in preclinical and clinical study design responsible for the translational loss of efficacy? *Ann*  
25 *Neurol.* 2019;86(1):5-16.

1  
2  
3  
4  
5  
6  
7  
8  
9  
10  
11  
12  
13  
14  
15  
16  
17  
18  
19  
20  
21  
22  
23  
24  
25  
26  
27  
28  
29  
30  
31  
32  
33  
34  
35  
36  
37  
38  
39  
40  
41  
42  
43  
44  
45  
46  
47  
48  
49  
50  
51  
52  
53  
54  
55  
56  
57  
58  
59  
60

- 1 [11] Xue P, Wang M, Yan GH. Mesenchymal stem cell transplantation as an effective treatment strategy  
2 for ischemic stroke in Asia: A meta-analysis of controlled trials. *Ther Clin Risk Manag*. 2018;14:909–28.
- 3 [12] Hess DC, Wechsler LR, Clark WM, Savitz SI, Ford GA, Chiu D, et al. Safety and efficacy of  
4 multipotent adult progenitor cells in acute ischaemic stroke (MASTERS): a randomised, double-blind,  
5 placebo-controlled, phase 2 trial. *Lancet Neurol*. 2017;16:360-8.
- 6 [13] Gutierrez-Fernandez M, Otero-Ortega L, Ramos-Cejudo J, Rodriguez-Frutos B, Fuentes B, Díez-  
7 Tejedor E. Adipose tissue-derived mesenchymal stem cells as a strategy to improve recovery after stroke.  
8 *Expert Opin Biol Ther*. 2015;15:873-81.
- 9 [14] Lee SH, Jin KS, Bang OY, Kim BJ, Park SJ, Lee NH, et al. Differential migration of mesenchymal  
10 stem cells to ischemic regions after middle cerebral artery occlusion in rats. *PLoS One*. 2015;10:1-11.
- 11 [15]. Chang K-A, Lee J-H, Suh Y-H. Therapeutic potential of human adipose-derived stem cells in  
12 neurological disorders. *J Pharmacol Sci*. 2014;126:293-301.
- 13 [16] Gutierrez-Fernandez M, Rodríguez-Frutos B, Otero-Ortega L, Ramos-Cejudo J, Fuentes B, Díez-  
14 Tejedor E. Adipose tissue-derived stem cells in stroke treatment: from bench to bedside. *Discov Med*.  
15 2013;16:37-43.
- 16 [17] Gutiérrez-Fernández M, Rodríguez-Frutos B, Ramos-Cejudo J, Teresa Vallejo-Cremades M, Fuentes  
17 B, Cerdán S, et al. Effects of intravenous administration of allogenic bone marrow- and adipose tissue-  
18 derived mesenchymal stem cells on functional recovery and brain repair markers in experimental  
19 ischemic stroke. *Stem Cell Res Ther*. 2013;4:11.
- 20 [18] Gómez -de Frutos M, Laso-García F, Diekhart L, Otero-Otega L et al. Intravenous delivery of  
21 adipose tissue-derived mesenchymal stem cells improves brain repair in hyperglucemic stroke rats. *Stem  
22 Cell Research and Therapy*. 2019; 10(1): 1-13
- 23 [19] Díez-Tejedor E, Gutiérrez-Fernández M, Martínez-Sánchez P, Rodríguez-Frutos B, Ruiz- Ares G,  
24 Lara ML, et al. Reparative Therapy for Acute Ischemic Stroke with Allogeneic Mesenchymal Stem Cells  
25 from Adipose Tissue: A Safety Assessment: A Phase II Randomized, Double-blind, Placebo-controlled,  
26 Single-center, Pilot Clinical Trial. *J Stroke Cerebrovasc Dis*. 2014;23:2694-700.
- 27 [20] <http://dx.doi.org/10.2139/ssrn.3420416>

- 1  
2  
3 1 [21] Hirano A, Sano M, Urushihata N, Tanemura H, Oki K, Suzuki E. Assessment of safety and  
4  
5 2 feasibility of human allogeneic adipose-derived mesenchymal stem cells in a pediatric patient. *Pediatr*  
6  
7 3 *Res* [Internet]. 2018;(April):575–7.  
8  
9  
10 4 [22] Zheng G, Huang L, Tong H, Shu Q, Hu Y, Ge M, et al. Treatment of acute respiratory distress  
11  
12 5 syndrome with allogeneic adipose-derived mesenchymal stem cells: a randomized, placebo-controlled  
13  
14 6 pilot study. *Respir Res*. 2014;15:39.  
15  
16 7 [23] Álvaro-Gracia JM, Jover JA, García-Vicuña R, Carreño L, Alonso A, Marsal S, et al. Intravenous  
17  
18 8 administration of expanded allogeneic adipose-derived mesenchymal stem cells in refractory rheumatoid  
19  
20 9 arthritis (Cx611): results of a multicentre, dose escalation, randomised, single-blind, placebo-controlled  
21  
22 10 phase Ib/IIa clinical trial. *Ann Rheum Dis*.2017;76:196-202.  
23  
24 11 [24] Moniche F, Gonzalez A, Gonzalez-Marcos JR, Carmona M, Piñero P, Espigado I, et al. Intra-arterial  
25  
26 12 bone marrow mononuclear cells in ischemic stroke: A pilot clinical trial. *Stroke*. 2012;43(8):2242–4.  
27  
28  
29 13 [25] Moniche F, Montaner J, Gonzalez-Marcos JR, Carmona M, Piñero P, Espigado I, et al. Intra-arterial  
30  
31 14 bone marrow mononuclear cell transplantation correlates with GM-CSF, PDGF-BB, and MMP-2 Serum  
32  
33 15 levels in stroke patients: Results from a clinical trial. *Cell Transplant* [Internet]. 2014;23(13):S57–64.  
34  
35 16 Available from: <https://doi.org/10.3727/096368914X684934>  
36  
37  
38  
39  
40  
41  
42  
43  
44  
45  
46  
47  
48  
49  
50  
51  
52  
53  
54  
55  
56  
57  
58  
59  
60

1  
2  
3  
4  
5  
6  
7  
8  
9  
10  
11  
12  
13  
14  
15  
16  
17  
18  
19  
20  
21  
22  
23  
24  
25  
26  
27  
28  
29  
30  
31  
32  
33  
34  
35  
36  
37  
38  
39  
40  
41  
42  
43  
44  
45  
46  
47  
48  
49  
50  
51  
52  
53  
54  
55  
56  
57  
58  
59  
60

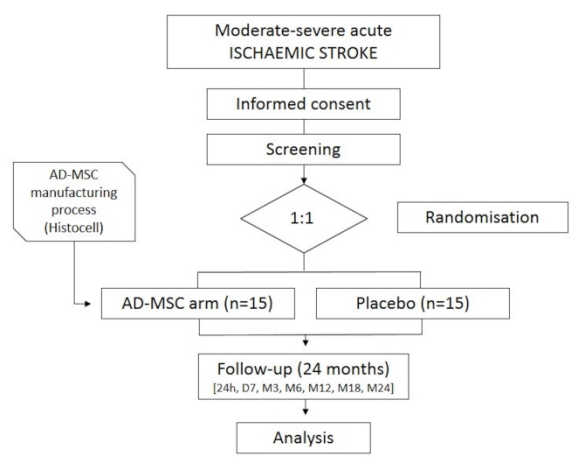

Figure 1. Schematic flowchart of the clinical trial

338x190mm (600 x 600 DPI)





STANDARD PROTOCOL ITEMS: RECOMMENDATIONS FOR INTERVENTIONAL TRIALS

**Author comment: Items not mentioned in the manuscript sent for revision are not applicable or otherwise specified in the original study protocol**

SPIRIT 2013 Checklist: Recommended items to address in a clinical trial protocol and related documents\*

| Section/item                      | Item No   | Description                                                                                                                                                                                                                                                                              |
|-----------------------------------|-----------|------------------------------------------------------------------------------------------------------------------------------------------------------------------------------------------------------------------------------------------------------------------------------------------|
| <b>Administrative information</b> |           |                                                                                                                                                                                                                                                                                          |
| Title                             | 1         | Descriptive title identifying the study design, population, interventions, and, if applicable, trial acronym ( <b>Page 1</b> )                                                                                                                                                           |
| Trial registration                | 2a        | Trial identifier and registry name. If not yet registered, name of intended registry. ( <b>NCT04280003. EudraCT: 2019-001724-35</b> )                                                                                                                                                    |
|                                   | <b>2b</b> | All items from the World Health Organization Trial Registration Data Set (not applicable)                                                                                                                                                                                                |
| Protocol version                  | 3         | Date and version identifier ( <b>5<sup>th</sup>May 2020, version 2</b> )                                                                                                                                                                                                                 |
| Funding                           | 4         | Sources and types of financial, material, and other support ( <b>On pages 16-17</b> )                                                                                                                                                                                                    |
| Roles and responsibilities        | 5a        | Names, affiliations, and roles of protocol contributors ( <b>On page 1 and pages 18-19</b> ).                                                                                                                                                                                            |
|                                   | 5b        | Name and contact information for the trial sponsor ( <b>Page 16</b> ).                                                                                                                                                                                                                   |
|                                   | <b>5c</b> | Role of study sponsor and funders, if any, in study design; collection, management, analysis, and interpretation of data; writing of the report; and the decision to submit the report for publication, including whether they will have ultimate authority over any of these activities |
|                                   | <b>5d</b> | Composition, roles, and responsibilities of the coordinating centre, steering committee, endpoint adjudication committee, data management team, and other individuals or groups overseeing the trial, if applicable (see Item 21a for data monitoring committee)                         |
| <b>Introduction</b>               |           |                                                                                                                                                                                                                                                                                          |
| Background and rationale          | 6a        | Description of research question and justification for undertaking the trial, including summary of relevant studies (published and unpublished) examining benefits and harms for each intervention ( <b>Pages 5-7</b> )                                                                  |

|    |                                                                     |            |                                                                                                                                                                                                                                                                                                                                                                                                            |
|----|---------------------------------------------------------------------|------------|------------------------------------------------------------------------------------------------------------------------------------------------------------------------------------------------------------------------------------------------------------------------------------------------------------------------------------------------------------------------------------------------------------|
| 1  |                                                                     |            |                                                                                                                                                                                                                                                                                                                                                                                                            |
| 2  |                                                                     | <b>6b</b>  | Explanation for choice of comparators                                                                                                                                                                                                                                                                                                                                                                      |
| 3  |                                                                     |            |                                                                                                                                                                                                                                                                                                                                                                                                            |
| 4  | Objectives                                                          | 7          | Specific objectives or hypotheses ( <b>Pages 7-8</b> )                                                                                                                                                                                                                                                                                                                                                     |
| 5  |                                                                     |            |                                                                                                                                                                                                                                                                                                                                                                                                            |
| 6  | Trial design                                                        | 8          | Description of trial design including type of trial (eg, parallel group, crossover, factorial, single group), allocation ratio, and framework (eg, superiority, equivalence, noninferiority, exploratory) ( <b>Page 7</b> )                                                                                                                                                                                |
| 7  |                                                                     |            |                                                                                                                                                                                                                                                                                                                                                                                                            |
| 8  |                                                                     |            |                                                                                                                                                                                                                                                                                                                                                                                                            |
| 9  |                                                                     |            |                                                                                                                                                                                                                                                                                                                                                                                                            |
| 10 |                                                                     |            |                                                                                                                                                                                                                                                                                                                                                                                                            |
| 11 |                                                                     |            |                                                                                                                                                                                                                                                                                                                                                                                                            |
| 12 | <b>Methods: Participants, interventions, and outcomes</b>           |            |                                                                                                                                                                                                                                                                                                                                                                                                            |
| 13 |                                                                     |            |                                                                                                                                                                                                                                                                                                                                                                                                            |
| 14 | Study setting                                                       | 9          | Description of study settings (eg, community clinic, academic hospital) and list of countries where data will be collected. Reference to where list of study sites can be obtained). ( <b>Page 7</b> )                                                                                                                                                                                                     |
| 15 |                                                                     |            |                                                                                                                                                                                                                                                                                                                                                                                                            |
| 16 |                                                                     |            |                                                                                                                                                                                                                                                                                                                                                                                                            |
| 17 |                                                                     |            |                                                                                                                                                                                                                                                                                                                                                                                                            |
| 18 | Eligibility criteria                                                | 10         | Inclusion and exclusion criteria for participants. If applicable, eligibility criteria for study centres and individuals who will perform the interventions (eg, surgeons, psychotherapists) ( <b>Pages 8 - 10</b> )                                                                                                                                                                                       |
| 19 |                                                                     |            |                                                                                                                                                                                                                                                                                                                                                                                                            |
| 20 |                                                                     |            |                                                                                                                                                                                                                                                                                                                                                                                                            |
| 21 |                                                                     |            |                                                                                                                                                                                                                                                                                                                                                                                                            |
| 22 |                                                                     |            |                                                                                                                                                                                                                                                                                                                                                                                                            |
| 23 | Interventions                                                       | 11a        | Interventions for each group with sufficient detail to allow replication, including how and when they will be administered ( <b>Page 13</b> )                                                                                                                                                                                                                                                              |
| 24 |                                                                     |            |                                                                                                                                                                                                                                                                                                                                                                                                            |
| 25 |                                                                     |            |                                                                                                                                                                                                                                                                                                                                                                                                            |
| 26 |                                                                     | 11b        | Criteria for discontinuing or modifying allocated interventions for a given trial participant (eg, drug dose change in response to harms, participant request, or improving/worsening disease) ( <b>Page 13</b> )                                                                                                                                                                                          |
| 27 |                                                                     |            |                                                                                                                                                                                                                                                                                                                                                                                                            |
| 28 |                                                                     |            |                                                                                                                                                                                                                                                                                                                                                                                                            |
| 29 |                                                                     |            |                                                                                                                                                                                                                                                                                                                                                                                                            |
| 30 |                                                                     |            |                                                                                                                                                                                                                                                                                                                                                                                                            |
| 31 |                                                                     | <b>11c</b> | Strategies to improve adherence to intervention protocols, and any procedures for monitoring adherence (eg, drug tablet return, laboratory tests)                                                                                                                                                                                                                                                          |
| 32 |                                                                     |            |                                                                                                                                                                                                                                                                                                                                                                                                            |
| 33 |                                                                     |            |                                                                                                                                                                                                                                                                                                                                                                                                            |
| 34 |                                                                     |            |                                                                                                                                                                                                                                                                                                                                                                                                            |
| 35 |                                                                     | 11d        | Relevant concomitant care and interventions that are permitted or prohibited during the trial ( <b>Pages 8 and 13</b> )                                                                                                                                                                                                                                                                                    |
| 36 |                                                                     |            |                                                                                                                                                                                                                                                                                                                                                                                                            |
| 37 |                                                                     |            |                                                                                                                                                                                                                                                                                                                                                                                                            |
| 38 | Outcomes                                                            | 12         | Primary, secondary, and other outcomes, including the specific measurement variable (eg, systolic blood pressure), analysis metric (eg, change from baseline, final value, time to event), method of aggregation (eg, median, proportion), and time point for each outcome. Explanation of the clinical relevance of chosen efficacy and harm outcomes is strongly recommended. ( <b>Pages 10 and 11</b> ) |
| 39 |                                                                     |            |                                                                                                                                                                                                                                                                                                                                                                                                            |
| 40 |                                                                     |            |                                                                                                                                                                                                                                                                                                                                                                                                            |
| 41 |                                                                     |            |                                                                                                                                                                                                                                                                                                                                                                                                            |
| 42 |                                                                     |            |                                                                                                                                                                                                                                                                                                                                                                                                            |
| 43 |                                                                     |            |                                                                                                                                                                                                                                                                                                                                                                                                            |
| 44 |                                                                     |            |                                                                                                                                                                                                                                                                                                                                                                                                            |
| 45 |                                                                     |            |                                                                                                                                                                                                                                                                                                                                                                                                            |
| 46 | Participant timeline                                                | 13         | Time schedule of enrolment, interventions (including any run-ins and washouts), assessments, and visits for participants. A schematic diagram is highly recommended (see Figure) ( <b>Pages 11-13</b> )                                                                                                                                                                                                    |
| 47 |                                                                     |            |                                                                                                                                                                                                                                                                                                                                                                                                            |
| 48 |                                                                     |            |                                                                                                                                                                                                                                                                                                                                                                                                            |
| 49 |                                                                     |            |                                                                                                                                                                                                                                                                                                                                                                                                            |
| 50 |                                                                     |            |                                                                                                                                                                                                                                                                                                                                                                                                            |
| 51 | Sample size                                                         | 14         | Estimated number of participants needed to achieve study objectives and how it was determined, including clinical and statistical assumptions supporting any sample size calculations ( <b>Page 14</b> )                                                                                                                                                                                                   |
| 52 |                                                                     |            |                                                                                                                                                                                                                                                                                                                                                                                                            |
| 53 |                                                                     |            |                                                                                                                                                                                                                                                                                                                                                                                                            |
| 54 |                                                                     |            |                                                                                                                                                                                                                                                                                                                                                                                                            |
| 55 | Recruitment                                                         | 15         | Strategies for achieving adequate participant enrolment to reach target sample size ( <b>Page 8</b> )                                                                                                                                                                                                                                                                                                      |
| 56 |                                                                     |            |                                                                                                                                                                                                                                                                                                                                                                                                            |
| 57 |                                                                     |            |                                                                                                                                                                                                                                                                                                                                                                                                            |
| 58 |                                                                     |            |                                                                                                                                                                                                                                                                                                                                                                                                            |
| 59 | <b>Methods: Assignment of interventions (for controlled trials)</b> |            |                                                                                                                                                                                                                                                                                                                                                                                                            |
| 60 |                                                                     |            |                                                                                                                                                                                                                                                                                                                                                                                                            |

## Allocation:

|                                  |            |                                                                                                                                                                                                                                                                                                                                                                             |
|----------------------------------|------------|-----------------------------------------------------------------------------------------------------------------------------------------------------------------------------------------------------------------------------------------------------------------------------------------------------------------------------------------------------------------------------|
| Sequence generation              | 16a        | Method of generating the allocation sequence (eg, computer-generated random numbers), and list of any factors for stratification. To reduce predictability of a random sequence, details of any planned restriction (eg, blocking) should be provided in a separate document that is unavailable to those who enrol participants or assign interventions ( <b>Page 10</b> ) |
| Allocation concealment mechanism | 16b        | Mechanism of implementing the allocation sequence (eg, central telephone; sequentially numbered, opaque, sealed envelopes), describing any steps to conceal the sequence until interventions are assigned ( <b>Page 10</b> )                                                                                                                                                |
| Implementation                   | 16c        | Who will generate the allocation sequence, who will enrol participants, and who will assign participants to interventions ( <b>Pages 8 and 10</b> )                                                                                                                                                                                                                         |
| Blinding (masking)               | 17a        | Who will be blinded after assignment to interventions (eg, trial participants, care providers, outcome assessors, data analysts), and how ( <b>Page 10</b> )                                                                                                                                                                                                                |
|                                  | <b>17b</b> | If blinded, circumstances under which unblinding is permissible, and procedure for revealing a participant's allocated intervention during the trial                                                                                                                                                                                                                        |

**Methods: Data collection, management, and analysis**

|                         |            |                                                                                                                                                                                                                                                                                                                                                                                                                                    |
|-------------------------|------------|------------------------------------------------------------------------------------------------------------------------------------------------------------------------------------------------------------------------------------------------------------------------------------------------------------------------------------------------------------------------------------------------------------------------------------|
| Data collection methods | 18a        | Plans for assessment and collection of outcome, baseline, and other trial data, including any related processes to promote data quality (eg, duplicate measurements, training of assessors) and a description of study instruments (eg, questionnaires, laboratory tests) along with their reliability and validity, if known. Reference to where data collection forms can be found, if not in the protocol ( <b>Page 10-11</b> ) |
|                         | <b>18b</b> | Plans to promote participant retention and complete follow-up, including list of any outcome data to be collected for participants who discontinue or deviate from intervention protocols                                                                                                                                                                                                                                          |
| Data management         | 19         | Plans for data entry, coding, security, and storage, including any related processes to promote data quality (eg, double data entry; range checks for data values). Reference to where details of data management procedures can be found, if not in the protocol ( <b>Page 15</b> )                                                                                                                                               |
| Statistical methods     | 20a        | Statistical methods for analysing primary and secondary outcomes. Reference to where other details of the statistical analysis plan can be found, if not in the protocol ( <b>Page 14 and 15</b> )                                                                                                                                                                                                                                 |
|                         | 20b        | Methods for any additional analyses (eg, subgroup and adjusted analyses) ( <b>Page 15</b> )                                                                                                                                                                                                                                                                                                                                        |

1  
2 20c Definition of analysis population relating to protocol non-adherence  
3 (eg, as randomised analysis), and any statistical methods to handle  
4 missing data (eg, multiple imputation) **(Page 15)**  
5

6 **Methods: Monitoring**  
7

8 Data monitoring 21a Composition of data monitoring committee (DMC); summary of its role  
9 and reporting structure; statement of whether it is independent from  
10 the sponsor and competing interests; and reference to where further  
11 details about its charter can be found, if not in the protocol.  
12 Alternatively, an explanation of why a DMC is not needed **(Page 15)**  
13

14  
15 **21b** Description of any interim analyses and stopping guidelines, including  
16 who will have access to these interim results and make the final  
17 decision to terminate the trial  
18

19 Harms 22 Plans for collecting, assessing, reporting, and managing solicited and  
20 spontaneously reported adverse events and other unintended effects  
21 of trial interventions or trial conduct **(Page 10)**  
22

23  
24 Auditing 23 Frequency and procedures for auditing trial conduct, if any, and  
25 whether the process will be independent from investigators and the  
26 sponsor **(Page 15)**  
27

28  
29 **Ethics and dissemination**  
30

31 Research ethics 24 Plans for seeking research ethics committee/institutional review board  
32 approval **(Page 17)**  
33

34 Protocol 25 Plans for communicating important protocol modifications (eg,  
35 amendments changes to eligibility criteria, outcomes, analyses) to relevant parties  
36 (eg, investigators, REC/IRBs, trial participants, trial registries, journals,  
37 regulators) **(Page 17)**  
38

39  
40 Consent or assent 26a Who will obtain informed consent or assent from potential trial  
41 participants or authorised surrogates, and how (see Item 32) **(Page**  
42 **17)**  
43

44 26b Additional consent provisions for collection and use of participant data  
45 and biological specimens in ancillary studies, if applicable **(included**  
46 **in the informed consent form as supplementary material).**  
47

48 Confidentiality 27 How personal information about potential and enrolled participants will  
49 be collected, shared, and maintained in order to protect confidentiality  
50 before, during, and after the trial **(Page 18)**  
51

52  
53 Declaration of 28 Financial and other competing interests for principal investigators for  
54 interests the overall trial and each study site **(Page 16)**  
55

56 Access to data 29 Statement of who will have access to the final trial dataset, and  
57 disclosure of contractual agreements that limit such access for  
58 investigators **(Page 18)**  
59  
60

|    |                   |            |                                                                                  |
|----|-------------------|------------|----------------------------------------------------------------------------------|
| 1  |                   |            |                                                                                  |
| 2  | Ancillary and     | 30         | Provisions, if any, for ancillary and post-trial care, and for                   |
| 3  | post-trial care   |            | compensation to those who suffer harm from trial participation ( <b>Page</b>     |
| 4  |                   |            | <b>18</b> )                                                                      |
| 5  |                   |            |                                                                                  |
| 6  | Dissemination     | 31a        | Plans for investigators and sponsor to communicate trial results to              |
| 7  | policy            |            | participants, healthcare professionals, the public, and other relevant           |
| 8  |                   |            | groups (eg, via publication, reporting in results databases, or other            |
| 9  |                   |            | data sharing arrangements), including any publication restrictions               |
| 10 |                   |            | <b>(Page 18)</b>                                                                 |
| 11 |                   |            |                                                                                  |
| 12 |                   |            |                                                                                  |
| 13 |                   | <b>31b</b> | Authorship eligibility guidelines and any intended use of professional           |
| 14 |                   |            | writers                                                                          |
| 15 |                   |            |                                                                                  |
| 16 |                   | 31c        | Plans, if any, for granting public access to the full protocol, participant-     |
| 17 |                   |            | level dataset, and statistical code ( <b>Page 18</b> )                           |
| 18 |                   |            |                                                                                  |
| 19 |                   |            |                                                                                  |
| 20 | <b>Appendices</b> |            |                                                                                  |
| 21 |                   |            |                                                                                  |
| 22 | Informed consent  | 32         | Model consent form and other related documentation given to                      |
| 23 | materials         |            | participants and authorised surrogates ( <b>provided as supplementary</b>        |
| 24 |                   |            | <b>data</b> )                                                                    |
| 25 |                   |            |                                                                                  |
| 26 | Biological        | 33         | Plans for collection, laboratory evaluation, and storage of biological           |
| 27 | specimens         |            | specimens for genetic or molecular analysis in the current trial and for         |
| 28 |                   |            | future use in ancillary studies, if applicable ( <b>included in the informed</b> |
| 29 |                   |            | <b>consent form</b> ).                                                           |
| 30 |                   |            |                                                                                  |
| 31 |                   |            |                                                                                  |

---

\*It is strongly recommended that this checklist be read in conjunction with the SPIRIT 2013 Explanation & Elaboration for important clarification on the items. Amendments to the protocol should be tracked and dated. The SPIRIT checklist is copyrighted by the SPIRIT Group under the Creative Commons "[Attribution-NonCommercial-NoDerivs 3.0 Unported](https://creativecommons.org/licenses/by-nc-nd/3.0/)" license.

# BMJ Open

## Allogeneic adipose tissue-derived mesenchymal stem cells in ischaemic stroke (AMASCIS-02): A phase IIb, multicentre, double-blind, placebo-controlled clinical trial protocol

|                                 |                                                                                                                                                                                                                                                                                                                                                                                                                                                                                                                          |
|---------------------------------|--------------------------------------------------------------------------------------------------------------------------------------------------------------------------------------------------------------------------------------------------------------------------------------------------------------------------------------------------------------------------------------------------------------------------------------------------------------------------------------------------------------------------|
| Journal:                        | <i>BMJ Open</i>                                                                                                                                                                                                                                                                                                                                                                                                                                                                                                          |
| Manuscript ID                   | bmjopen-2021-051790.R2                                                                                                                                                                                                                                                                                                                                                                                                                                                                                                   |
| Article Type:                   | Protocol                                                                                                                                                                                                                                                                                                                                                                                                                                                                                                                 |
| Date Submitted by the Author:   | 20-Jul-2021                                                                                                                                                                                                                                                                                                                                                                                                                                                                                                              |
| Complete List of Authors:       | de Celis-Ruiz, Elena; La Paz University Hospital Biomedical Research Foundation, Neurology<br>Fuentes, Blanca; La Paz University Hospital, Neurology<br>Moniche, Francisco; Virgen del Rocio University Hospital, Neurology<br>Montaner, J.; Virgen Macarena University Hospital, Neurology<br>Borobia, Alberto; La Paz University Hospital, Clinical Pharmacology<br>Gutiérrez-Fernández, M.; La Paz University Hospital, Neurology<br>Díez-Tejedor, Exuperio; Autonomous University of Madrid, Department of Neurology |
| <b>Primary Subject Heading</b>: | Neurology                                                                                                                                                                                                                                                                                                                                                                                                                                                                                                                |
| Secondary Subject Heading:      | Pharmacology and therapeutics                                                                                                                                                                                                                                                                                                                                                                                                                                                                                            |
| Keywords:                       | Stroke < NEUROLOGY, Clinical trials < THERAPEUTICS, Adverse events < THERAPEUTICS                                                                                                                                                                                                                                                                                                                                                                                                                                        |
|                                 |                                                                                                                                                                                                                                                                                                                                                                                                                                                                                                                          |

SCHOLARONE™  
Manuscripts



I, the Submitting Author has the right to grant and does grant on behalf of all authors of the Work (as defined in the below author licence), an exclusive licence and/or a non-exclusive licence for contributions from authors who are: i) UK Crown employees; ii) where BMJ has agreed a CC-BY licence shall apply, and/or iii) in accordance with the terms applicable for US Federal Government officers or employees acting as part of their official duties; on a worldwide, perpetual, irrevocable, royalty-free basis to BMJ Publishing Group Ltd ("BMJ") its licensees and where the relevant Journal is co-owned by BMJ to the co-owners of the Journal, to publish the Work in this journal and any other BMJ products and to exploit all rights, as set out in our [licence](#).

The Submitting Author accepts and understands that any supply made under these terms is made by BMJ to the Submitting Author unless you are acting as an employee on behalf of your employer or a postgraduate student of an affiliated institution which is paying any applicable article publishing charge ("APC") for Open Access articles. Where the Submitting Author wishes to make the Work available on an Open Access basis (and intends to pay the relevant APC), the terms of reuse of such Open Access shall be governed by a Creative Commons licence – details of these licences and which [Creative Commons](#) licence will apply to this Work are set out in our licence referred to above.

Other than as permitted in any relevant BMJ Author's Self Archiving Policies, I confirm this Work has not been accepted for publication elsewhere, is not being considered for publication elsewhere and does not duplicate material already published. I confirm all authors consent to publication of this Work and authorise the granting of this licence.

1 **Allogeneic adipose tissue-derived mesenchymal stem cells in ischaemic**  
2 **stroke (AMASCIS-02): A phase IIb, multicentre, double-blind,**  
3 **placebo-controlled clinical trial protocol**

4 E. de Celis-Ruiz, MD,\*<sup>1</sup> B. Fuentes, MD, PhD,\*<sup>1</sup> F. Moniche, MD, PhD,<sup>2</sup> J. Montaner, MD,  
5 PhD,<sup>3</sup> A. M. Borobia, MD, PhD,<sup>4</sup> M. Gutiérrez-Fernández, BiolD, PhD,<sup>1</sup> E. Díez-Tejedor<sup>1</sup> MD,  
6 PhD

7 Affiliation:

- 8 1. Department of Neurology and Stroke Centre, Neurosciences Area - IdiPAZ (Health Research  
9 Institute), La Paz University Hospital - Autonomous University of Madrid, Madrid, Spain
- 10 2. Department of Neurology, Virgen del Rocío University Hospital, Institute of Biomedicine of  
11 Seville, IBiS/Hospital Universitario Virgen del Rocío/CSIC, University of Seville, Seville, Spain
- 12 3. Department of Neurology, Virgen Macarena University Hospital, Institute of Biomedicine of  
13 Seville, IBiS/Hospital Universitario Virgen del Rocío/CSIC, University of Seville, Seville, Spain
- 14 4. Department of Clinical Pharmacology, IdiPAZ (Health Research Institute), La Paz University  
15 Hospital - Autonomous University of Madrid, Madrid, Spain

16  
17 \*Elena de Celis-Ruiz and Blanca Fuentes equally contributed in the elaboration of this  
18 manuscript

19 Corresponding authors:

20 -Prof Exuperio Díez Tejedor. Email address: [exuperio.diez@salud.madrid.org](mailto:exuperio.diez@salud.madrid.org)

21 -Dr Blanca Fuentes Gimeno. Email address: [blanca.fuentes@salud.madrid.org](mailto:blanca.fuentes@salud.madrid.org)

22 Address: La Paz University Hospital, General Building, Level 11, Neurology Department,  
23 Paseo de la Castellana 261, 28046, Madrid, Spain.



1  
2  
3  
4  
5  
6  
7  
8  
9  
10  
11  
12  
13  
14  
15  
16  
17  
18  
19  
20  
21  
22  
23  
24  
25  
26  
27  
28  
29  
30  
31  
32  
33  
34  
35  
36  
37  
38  
39  
40  
41  
42  
43  
44  
45  
46  
47  
48  
49  
50  
51  
52  
53  
54  
55  
56  
57  
58  
59  
60

1  
2  
3  
4  
5  
6  
7  
8  
9  
10  
11  
12  
13  
14  
15  
16  
17  
18  
19  
20  
21  
22  
23  
24  
25  
26  
27  
28  
29  
30  
31  
32  
33  
34  
35  
36  
37  
38  
39  
40  
41  
42  
43  
44  
45  
46  
47  
48  
49  
50  
51  
52  
53  
54  
55  
56  
57  
58  
59  
60

*Word count:* Abstract 257 words, text body without references, abbreviations and author affiliations 3825 words.

List of tables and figures:

- Table 1. Methods flowchart
- Figure 1. Schematic flowchart of the clinical trial

List of abbreviations:

- AD-MSCs: allogeneic adipose tissue-derived mesenchymal stem cells
- MSCs: mesenchymal stem cells
- CT: computed tomography
- MRI: magnetic resonance imaging
- NIHSS: National Institutes of Health Stroke Scale
- mRS: modified Rankin Scale
- AEs: Adverse events
- GM-CSF: Granulocyte-macrophage colony-stimulating factor
- PDGF-BB: platelet-derived growth factor BB
- BDNF: brain-derived neurotrophic factor
- VEGF: vascular endothelial growth factor
- TGF-1: transforming growth factor 1
- GFAP: endostatin, glial fibrillary acid protein
- MBP: myelin basic protein
- MMP-3: matrix metalloproteinase 3
- ECG: electrocardiogram
- SCReN: Spanish Clinical Research Network

- 1
  - 2
  - 3
  - 4
  - 5
  - 6
  - 7
  - 8
  - 9
  - 10
  - 11
  - 12
  - 13
  - 14
  - 15
  - 16
  - 17
  - 18
  - 19
  - 20
  - 21
  - 22
  - 23
  - 24
  - 25
  - 26
  - 27
  - 28
  - 29
  - 30
  - 31
  - 32
  - 33
  - 34
  - 35
  - 36
  - 37
  - 38
  - 39
  - 40
  - 41
  - 42
  - 43
  - 44
  - 45
  - 46
  - 47
  - 48
  - 49
  - 50
  - 51
  - 52
  - 53
  - 54
  - 55
  - 56
  - 57
  - 58
  - 59
  - 60
- 1 • IQR: interquartile range

For peer review only

1  
2  
3 1 **ABSTRACT**  
4  
5

6 2 **Introduction:** Stroke is a serious public health problem, given it is a major cause of disability  
7  
8 3 worldwide despite the spread of recanalization therapies. Enhancement of brain plasticity with  
9  
10 4 stem cell administration is a promising innovative therapy to reduce sequelae in these patients.

11  
12 5 **Methods and analysis:** We have developed a phase IIb, multicentre, randomised, double-blind,  
13  
14 6 placebo-controlled clinical trial protocol to evaluate the safety and efficacy of intravenous  
15  
16 7 administration of allogeneic adipose tissue-derived mesenchymal stem cells (AD-MSCs) in  
17  
18 8 patients with acute ischaemic stroke, concurrently with conventional stroke treatment. Thirty  
19  
20 9 patients will be randomised on a 1:1 basis to receive either intravenous placebo or allogeneic  
21  
22 10 AD-MSCs as soon as possible within the first 4 days from stroke symptom onset. Patients will  
23  
24 11 be followed up to 24 months after randomisation. The primary objective is the safety assessment  
25  
26 12 of early intravenous administration of allogeneic AD-MSCs by reporting all adverse events and  
27  
28 13 neurological or systemic complications in both treatment groups. Secondary objectives assess  
29  
30 14 efficacy of early intravenous AD-MSC treatment in acute ischaemic stroke by evaluating  
31  
32 15 changes in the modified Rankin Scale and the National Institutes of Health Stroke Scale  
33  
34 16 throughout the follow-up period. In addition, brain repair biomarkers will be measured at  
35  
36 17 various visits.

37  
38  
39  
40 18 **Ethics and dissemination:** This clinical trial has been approved by the Clinical Research Ethics  
41  
42 19 Committee of La Paz University Hospital (Madrid, Spain) and by the Spanish Agency of  
43  
44 20 Medication and Health Products, and has been registered in Eudra CT (2019-001724-35) and  
45  
46 21 ClinicalTrials.gov (NCT04280003). Study results will be disseminated through peer-reviewed  
47  
48 22 publications in Open Access format and at conference presentations.  
49  
50

51 23

52  
53  
54 24

55  
56  
57 25  
58  
59  
60

1  
2  
3 **1 Strengths and limitations of this study**  
4

- 5  
6 2 • First multicentre clinical trial evaluating safety and possible efficacy of early  
7  
8 3 intravenous treatment with adipose derived mesenchymal stem cells in ischemic stroke.  
9  
10  
11 4 • The trial is designed as a randomised, placebo-controlled, double-blind study so biases  
12  
13 5 will be minimised, albeit limiting general population applicability.  
14  
15  
16 6 • Limitations for external validity are the fact that patients are recruited in a single  
17  
18 7 country from only 2 centres and the small sample size.  
19

20  
21 8 **KEY WORDS:** *Acute ischaemic stroke, Allogeneic adipose tissue-derived mesenchymal stem*  
22  
23 9 *cells, Clinical trial, Stem cell therapy, safety.*  
24  
25  
26  
27  
28  
29  
30  
31  
32  
33  
34  
35  
36  
37  
38  
39  
40  
41  
42  
43  
44  
45  
46  
47  
48  
49  
50  
51  
52  
53  
54  
55  
56  
57  
58  
59  
60

## 1 INTRODUCTION

2 Stroke is a serious health problem, given it is one of the most common causes of mortality and  
3 the leading cause of disability due to neurologic diseases worldwide. In 2016, the global  
4 estimated incidence of stroke ranged between 189 and 218 cases per 100,000 inhabitants.[1] A  
5 large proportion of patients with ischaemic stroke have persistent neurological deficits that  
6 impair their daily life activities, and many also experience non-neurological complications, such  
7 as pulmonary and urinary tract infections, deep vein thrombosis and depression. In the last 2  
8 decades, there has been a breakthrough in ischaemic stroke treatments. However, currently  
9 available therapies, such as intravenous thrombolysis and mechanical thrombectomy, focus only  
10 on reperfusion in the acute phase and are not accessible to all patients due to a narrow time  
11 window and eligibility issues. Furthermore, these cerebral reperfusion-based therapies cannot  
12 reverse established ischaemic injury or reduce its sequelae. Therefore, to reduce the burden of  
13 this disease, there is an urgent need for therapies that can enhance patient recovery after stroke.

14 After a brain injury, several interrelated mechanisms, such as neurogenesis, gliogenesis,  
15 oligodendrogenesis, synaptogenesis and angiogenesis take place to repair the damaged tissue. In  
16 clinical practice, these processes are stimulated through rehabilitation therapies; however, cell  
17 therapies promote tissue repair exogenously,[2] which could complement current reperfusion  
18 treatments for acute ischaemic stroke.

19 Stem cells are immature cells with the capacity to differentiate into diverse cell lines. At  
20 present, challenges concerning the most suitable cell type, route and time of administration are  
21 the main issues for progression from preclinical studies to the design of clinical trials.[3-5]

22 Regarding the route of administration, preclinical studies have shown that it is not mandatory  
23 for stem cells to migrate and nest at the injury site to achieve functional recovery after stroke,  
24 given their therapeutic effect is also due to secretion of trophic factors and modulation of the  
25 immune response.[5,6] Intravenous administration has been proven to be noninferior to other  
26 routes in preclinical studies, such as in intracerebral, intrathecal or intra-arterial deliveries, and it

1 is far less invasive. Regarding cell type, preclinical and initial clinical trial data [5,7,8,9,10,11]  
2 suggest that mesenchymal stem cells (MSCs) constitute a safe and possibly effective therapy in  
3 ischaemic stroke. Allogeneic MSCs lack human leucocyte antigen-class II molecules, avoiding  
4 the risk of rejection and allowing short timings of administration.

5 Most studies concerning cell therapies in ischaemic stroke have been performed in chronic  
6 stages of the disease, although data from preclinical studies as well as the recent MASTERS  
7 trial suggest their early administration could be more effective. In the MASTERS trial,[12]  
8 intravenous administration of multipotent adult progenitor cells in patients with acute ischaemic  
9 stroke did not provoke any safety concerns or administration issues, and a tendency towards  
10 better functional recovery in the early treatment arm (<36 h from symptom onset instead of 36–  
11 48 h) versus placebo was observed. This observation was also supported by the fact that the  
12 trophic factors released during the acute phase after stroke inhibited the first steps of the  
13 ischaemic cascade and enhanced brain protection mechanisms.[3,13,14]

14 Adipose tissue-derived mesenchymal stem cells (AD-MSCs) are abundant, accessible and easy  
15 to obtain by lipoaspiration techniques;[15,16] they also can be administered without ethical  
16 concerns.[13] Their intravenous administration has been proven safe in rat models of ischaemic  
17 stroke and has also been associated with good functional recovery, reductions in cell death and  
18 increased cell proliferation at the peri-infarct zone without observed implantation of the AD-  
19 MSCs at the infarct site.[17, 18] To our knowledge, the first clinical trial assessing the safety  
20 and efficacy of intravenous administration of allogeneic AD-MSCs in patients with ischaemic  
21 stroke is the AMASCIS-01 trial (NCT01678534),[19] which has been performed by our study  
22 group. Although the 2-year follow-up results have not yet been published, a safety interim  
23 analysis at 6 months showed no safety concerns when the AD-MSCs were administered within  
24 the first 2 weeks after symptom onset.[20] Other case reports and clinical trials exploring this  
25 cell type in non-ischemic neurological diseases [21] and non-neurological diseases, such as in  
26 acute respiratory distress and refractory rheumatoid arthritis, have also shown no safety issues  
27 compared with the placebo group.[22, 23] .

1  
2  
3 1 In preclinical studies, the MSC dose in ischaemic stroke animal models has been variable, being  
4  
5 2 between  $10^4$ - $4.3 \times 10^7$  MSCs/kg.[7-10] Results appear more beneficial for lower rather than  
6  
7 3 higher cell doses, which could be due to the fact that higher doses could potentially provoke a  
8  
9 4 brain embolus or slow cerebral blood flow.[9] Our study group has used doses of  $1$ - $2 \times 10^6$   
10  
11 5 cells/kg in preclinical studies without issue. In the MASTERS trial, a single intravenous total  
12  
13 6 dose of  $4$  or  $12 \times 10^8$  multipotent adult progenitor cells did not cause any safety issues. In the  
14  
15 7 AMASCIS-01 trial performed by our study group, a single dose of  $10^6$  AD-MSCs/kg was  
16  
17 8 administered intravenously, also without safety concerns.

18  
19  
20 9 Therefore, in the AMASCIS-02 trial, we aim to show the safety of early allogeneic AD-MSC  
21  
22 10 intravenous administration ( $10^6$  cells/kg of the patient's weight within the first 4 days from  
23  
24 11 stroke onset) and explore the possible efficacy of this therapy in reducing stroke-associated  
25  
26 12 disability.

## 27 28 29 30 13 **METHODS AND ANALYSIS**

### 31 32 14 **Design**

33  
34  
35 15 The Allogeneic Adipose Tissue derived Mesenchymal Stem Cells in Ischemic Stroke  
36  
37 16 (AMASCIS-02) study is an academic, randomised, double-blind, placebo-controlled multicentre  
38  
39 17 clinical trial. The two recruiting centres are La Paz University Hospital and Virgen del Rocío  
40  
41 18 University Hospital, both of them in Spain. EudraCT: 2019-001724-35. The study is registered  
42  
43 19 at <http://www.clinicaltrials.gov> and identified by NCT04280003.

44  
45  
46 20 Recruitment began on January 2021, and the estimated end date is July 2023.

### 47 48 49 50 21 **Primary objective**

51  
52  
53 22 To assess the safety of intravenous administration of allogeneic AD-MSCs within the first 4  
54  
55 23 days from stroke onset in patients with acute ischaemic stroke.

56  
57  
58 24

## 1 **Secondary objective**

- 2  
3  
4  
5  
6  
7  
8  
9
- 2 To assess potential efficacy of allogeneic AD-MSCs when administered within the first 4 days  
3 from stroke onset in patients with acute ischaemic stroke.

## 4 **Eligibility**

5 Patients will be selected from the Neurology Department of both of the study centres. Acute  
6 stroke management of all patients will follow standard of care. Reperfusion therapies such as  
7 intravenous fibrinolysis and mechanical thrombectomy are allowed prior to patient screening  
8 and randomisation as long as all study inclusion and no exclusion criteria are met after their  
9 application. Inclusion and exclusion criteria are as follows:

### 10 • **Inclusion criteria**

- 11  
12  
13  
14  
15  
16  
17  
18  
19  
20  
21  
22  
23  
24
1. Men and women aged older than 18 years with acute ischaemic stroke.
  2. Treatment within 4 days (+/- 1 day) from the onset of stroke symptoms or from the last time observed as asymptomatic.
  3. A computed tomography (CT) or magnetic resonance imaging (MRI) scan compatible with the clinical diagnosis of acute nonlacunar ischaemic stroke in the region of the middle cerebral artery.
  4. A score on the National Institutes of Health Stroke Scale (NIHSS) of 8–20, with at least 2 of these points in sections 5 and 6 (motor deficit) at the time of inclusion. NIHSS evaluation for screening of these patients will take place after finalization of reperfusion therapies (if they have been performed) providing that the clinical condition of the patient is stable with no prevision of immediate recovery. A measurable focal neurologic disability must persist to the time of treatment administration.



1  
2  
3  
4  
5  
6  
7  
8  
9  
10  
11  
12  
13  
14  
15  
16  
17  
18  
19  
20  
21  
22  
23  
24  
25  
26  
27  
28  
29  
30  
31  
32  
33  
34  
35  
36  
37  
38  
39  
40  
41  
42  
43  
44  
45  
46  
47  
48  
49  
50  
51  
52  
53  
54  
55  
56  
57  
58  
59  
60

5. A prestroke score on the modified Rankin Scale (mRS)  $\leq 1$  (no significant disability).
6. Women with non-childbearing potential must have either (at least 1 criterion)
  - Undergone a hysterectomy and/or bilateral oophorectomy;
  - Have medically confirmed ovarian failure; or
  - Achieved postmenopausal status: cessation of regular menses for at least 12 consecutive months with no alternative cause.
7. Women with childbearing potential need a negative pregnancy test and must agree to use adequate contraception during the duration of the study.
8. Signed informed consent.

• **Exclusion criteria**

1. Comatose patients ( $\geq 2$  score on item 1a of the NIHSS, related to degree of awareness).
2. Evidence on neuroimaging of brain tumour, cerebral oedema with midline shift and a clinically significant compression of ventricles, cerebellar or brainstem infarction and intraventricular, intracerebral or subarachnoid haemorrhage. Small petechial haemorrhages are not exclusion criteria.
3. Current drug or alcohol dependence.
4. Active infectious disease, including human immunodeficiency virus and hepatitis B and C. A controlled infection is not an exclusion criterion.
5. Pre-existing dementia.
6. A health status, clinical condition or other characteristics that preclude appropriate diagnosis, treatment or follow-up in the trial.

1  
2  
3  
4  
5  
6  
7  
8  
9  
10  
11  
12  
13  
14  
15  
16  
17  
18  
19  
20  
21  
22  
23  
24  
25  
26  
27  
28  
29  
30  
31  
32  
33  
34  
35  
36  
37  
38  
39  
40  
41  
42  
43  
44  
45  
46  
47  
48  
49  
50  
51  
52  
53  
54  
55  
56  
57  
58  
59  
60

- 1 7. Inability or unwillingness of the individual or their representative to
- 2 provide written informed consent.
- 3 8. Participation in another clinical trial.

#### 4 **Randomisation**

5 Each patient will have a unique number assigned sequentially as they enter the study. The  
6 randomisation sequence was created using SAS version 9.4 statistical software (procedure  
7 'PROC PLAN') with a 1:1 allocation. No randomisation seed was specified. The randomisation  
8 seed was generated taking the hour of the computer when the program was executed.  
9 Randomisation will be stratified by age (<65 years or ≥65 years). After verifying the inclusion  
10 and exclusion criteria, patients will be assigned the study drug or a placebo solution.

#### 11 **Masking**

12 The study is double-blind. After a patient is randomised by a blinded member of the research  
13 team, a nonblinded research member will request the corresponding study medication according  
14 to the randomisation code. The study medication and the placebo solution will be  
15 indistinguishable, and masking will be made by the nonblinded research team members.

#### 16 **Outcomes**

17 *Principal variables.* The safety of AD-MSCs will be assessed using the following parameters:

- 18 • Adverse events (AEs) reported spontaneously by the patient or in response to questions not
- 19 addressed, and serious AEs (death, life-threatening events, events that require inpatient
- 20 hospitalisation or prolongation of existing hospitalisation, events that result in persistent or
- 21 significant disability, congenital anomalies or any other event that does not meet the
- 22 definitions above but can be considered potentially serious).

- 1  
2  
3 1 • Neurological and systemic complications (including abnormal laboratory values):  
4  
5 2 deteriorating stroke, stroke recurrences, brain oedema, seizures, haemorrhagic  
6  
7 3 transformation, respiratory infections, urinary tract infections, deep venous thrombosis and  
8  
9 4 pulmonary embolism.  
10

11 5  
12  
13 6 *Secondary variables.* The efficacy of intravenous treatment with AD-MSCs will be assessed  
14  
15 7 using the following parameters:  
16

- 17 8  
18  
19  
20 9 • Modified Rankin Scale (mRS): The outcome will be considered positive when the  
21  
22 10 patient obtains a score of 0–3, measured at months 3, 6, 12 and 24. An additional  
23  
24 11 exploratory efficacy analysis will consider mRS shift at months 3, 6, 12 and 24.  
25  
26 12 • National Institutes of Health Stroke Scale (NIHSS): Measured at all scheduled visits. A  
27  
28 13 successful outcome will occur with an improvement of 75% or more from the baseline  
29  
30 14 score. An additional exploratory efficacy analysis will measure differences in the  
31  
32 15 median (interquartile range [IQR]) distribution and in the frequency of an NIHSS  $\leq 1$   
33  
34 16 between groups.  
35  
36 17 • Biomarker measurement: Granulocyte-macrophage colony-stimulating factor (GM-  
37  
38 18 CSF), platelet-derived growth factor BB (PDGF-BB), brain-derived neurotrophic factor  
39  
40 19 (BDNF), vascular endothelial growth factor (VEGF), transforming growth factor 1  
41  
42 20 (TGF-1), endostatin, glial fibrillary acid protein (GFAP), myelin basic protein (MBP),  
43  
44 21 matrix metalloproteinase 3 (MMP-3) and extracellular vesicles will be measured at  
45  
46 22 baseline, day 7 and month 3 after treatment administration.  
47  
48  
49

## 50 23 **Study procedures**

51  
52  
53 24 After initial screening and randomisation (visit 1) takes place, the study treatment will be  
54  
55 25 administered within the first four days since stroke symptom onset (visit 2). Eight more visits  
56  
57 26 will take place during the 24 month follow-up period (2h, 24h, 7 days or hospital discharge, 3,  
58  
59 27 6, 12, 18 and 24 months since treatment administration) to assess security and efficacy measures  
60

1 (see table 1 for details of study visits and procedures and figure 1 for schematic flowchart of the  
 2 clinical trial design).

3 **Table 1. Flowchart of study visits and procedures**

| FLOWCHART                                                                    | Visit 1          | Visit 2            | Visit 3 | Visit 4 | Visit 5                                 | Visit 6       | Visit 7       | Visit 8        | Visit 9        | Visit 10       |
|------------------------------------------------------------------------------|------------------|--------------------|---------|---------|-----------------------------------------|---------------|---------------|----------------|----------------|----------------|
|                                                                              | Screening        | Baseline<br>0 h    | 2h      | 24 h    | Day 7 or<br>Discharge <sup>d</sup><br>) | M3<br>(±14 d) | M6<br>(±14 d) | M12<br>(±14 d) | M18<br>(±14 d) | M24<br>(±14 d) |
| Informed consent signature                                                   | X                |                    |         |         |                                         |               |               |                |                |                |
| Inclusion and exclusion criteria                                             | X                | X <sup>(2,3)</sup> |         |         |                                         |               |               |                |                |                |
| Past medical/surgical history Physical examination                           | X                |                    |         |         |                                         |               |               |                |                |                |
| Pregnancy test                                                               | X                |                    |         | X       | X                                       | X             | X             | X              | X              | X              |
| NIHSS                                                                        | X                | X <sup>(3)</sup>   | X       | X       | X                                       | X             | X             | X              | X              | X              |
| Modified Rankin Scale                                                        | X                |                    |         |         | X                                       | X             | X             | X              | X              | X              |
| Blood pressure                                                               | X                | X <sup>(3)</sup>   | X       | X       | X                                       |               |               |                |                |                |
| Heart rate                                                                   | X                | X <sup>(3)</sup>   | X       | X       | X                                       |               |               |                |                |                |
| Body temperature                                                             | X                | X <sup>(3)</sup>   | X       | X       | X                                       |               |               |                |                |                |
| Oxygen saturation                                                            | X                | X <sup>(3)</sup>   | X       | X       | X                                       |               |               |                |                |                |
| Capillary blood glucose                                                      | X                | X <sup>(3)</sup>   | X       | X       | X                                       |               |               |                |                |                |
| 12-lead ECG                                                                  | X                | X <sup>(3)</sup>   |         | X       |                                         |               |               |                |                | X              |
| Neuroimaging (brain CT)                                                      | X <sup>(1)</sup> |                    |         |         |                                         |               |               |                |                |                |
| Neuroimaging (brain MRI)                                                     | X <sup>(1)</sup> |                    |         |         |                                         |               |               |                |                |                |
| Randomisation                                                                | X                |                    |         |         |                                         |               |               |                |                |                |
| Study drug administration                                                    |                  | X                  |         |         |                                         |               |               |                |                |                |
| Laboratory assessments:<br>Haematology, coagulation test and<br>biochemistry | X                |                    |         | X       | X                                       |               |               |                |                | X              |
| Blood brain repair markers                                                   |                  | X <sup>(3)</sup>   |         |         | X                                       | X             |               |                |                |                |
| Adverse events register                                                      |                  | X <sup>(3)</sup>   | X       | X       | X                                       | X             | X             | X              | X              | X              |
| Concomitant drugs                                                            | X                | X <sup>(3)</sup>   | X       | X       | X                                       | X             | X             | X              | X              | X              |

4 NIHSS: National Institutes of Health Stroke Scale; ECG: electrocardiogram; CT: computed tomography;  
 5 MRI: magnetic resonance imaging.

6 <sup>(1)</sup> Review Neuroimaging (one of them, CT or MRI); <sup>(2)</sup> Review selection criteria; <sup>(3)</sup> Tests, measurements,  
 7 register of adverse events and study drug administration and also revision of inclusion and exclusion  
 8 criteria will take place before study drug administration. <sup>(4)</sup> Visit 5 is performed at day 7 after study  
 9 drug administration or at hospital discharge if it takes place before day 7.

## 1 **Treatment or intervention**

2 All study medications will be industrially manufactured, tested and released according to  
3 current Good Manufacturing Practice Guidelines by HistoCell. The experimental drug is an  
4 intravenous solution of allogeneic AD-MSCs in a concentration of 10 million cells per millilitre,  
5 obtained from a donor by *in vitro* cell culture techniques, conditioned in cryovials of Type I  
6 sterile borosilicate glass (with ringer lactate, glucosaline, sodium bicarbonate and human  
7 albumin 20% as excipients) and cryopreserved at  $-150^{\circ}$  C. The manufacturing process is  
8 detailed in the investigator's brochure, which has been approved by the Spanish Agency of  
9 Medicines and Health products. The placebo solution has the same appearance as the study drug  
10 and is formed by its excipients. Medication vials containing either solution will be dissolved in  
11 50ml of physiologic saline solution and dispensed as a single intravenous drop administration in  
12 approximately 30 minutes, at a dose of 1 million cells per kg of the patient's weight (for the  
13 AD-MSCs).

## 14 **Discontinuation of study medication**

15 The study medication must be discontinued if a suspected anaphylactic reaction or serious  
16 adverse event occurs during its administration or if patient participation consent is withdrawn.

## 17 **Standard treatments for the management of acute stroke**

18 All patients will be managed according to current guidelines for acute stroke management,  
19 including treatment with recanalization therapies such as intravenous thrombolysis, mechanical  
20 thrombectomy or both.

## 21 **Data collection and outcome measures**

22 An electronic case report form has been designed using MACRO. This system will maintain  
23 patient anonymity, and the data will be transferred to a '\*.csv' file to analyse it with R software  
24 (3.5.2 version or newer). To ensure the quality of the data, data management will be performed  
25 by the Spanish Clinical Research Network (SCReN). The data management plan has been

1 approved by the principal investigator and the sponsor. Data collection forms will be included in  
2 the final report.

### 3 **Sample size estimates**

4 Given this is a pilot phase II clinical trial focused on the assessment of safety, no systematic  
5 sample size calculation applies. Based on the previous clinical trial, AMASCIS-01  
6 (NCT01678534 and EudraCT: 2011-003551-18), it seems feasible to recruit 30 patients  
7 between the 2 participating centres.

### 8 **Statistical analyses**

9 Demographic and clinical characteristics will be summarised in terms of means and standard  
10 deviations, median and IQR or relative frequency as appropriate for each variable type. A  
11 univariate approach will be employed for calculating nonparametric tests for the continuous  
12 variables (Wilcoxon rank sum), and Fisher's or a chi-squared test will be employed for the  
13 categorical variables. Given the binary nature of the primary outcome, a logistic regression  
14 under the minimum Akaike information criterion using all available variables will be fitted to  
15 the data, estimating odds ratios and their confidence intervals. Rules of prediction for the binary  
16 outcome will be performed using receiver operating characteristic curves and k-fold cross-  
17 validation procedures. Only *P* values less than 0.05 will be considered significant. Statistical  
18 computations will be calculated using the statistical computing environment R. The statistical  
19 analysis will be performed by the personnel from the Clinical Pharmacology Service and  
20 Central Unit of Clinical Investigation and Clinical Trials. The safety analysis will include tables  
21 with all AEs and neurological and systemic complications. A descriptive analysis summarising  
22 efficacy variables in each group will be performed and an exploratory analysis will be  
23 conducted by comparing both treatment groups using the Wilcoxon rank sum test or Student's t-  
24 test.

25

1  
2  
3 1 *Plans for predefined subgroup analyses:*  
4  
5

6 2 1) The “intention to treat” population will consist of all patients for whom baseline variables  
7  
8 3 and at least 1 value of a principal or secondary variable are available. If a final visit variable is  
9  
10 4 not obtained for a patient, it will be replaced by the last available value (LOCF=Last  
11  
12 5 Observation Carried Forward).

13  
14  
15 6 2) The “per protocol” population will consist of all patients for whom infusion of the study  
16  
17 7 medication had been started with no major protocol violation.

18  
19  
20 8 3) The “safety analysis population” will consist of all patients for whom infusion of the study  
21  
22 9 medication had been started.

23  
24  
25 10 **Data monitoring body**

26  
27 11 Coordination, management, monitoring, data management and the statistical analysis will be  
28  
29 12 performed by the SCReN.

30  
31  
32 13 **Auditing**

33  
34  
35 14 During the progress of the study, audit visits may be conducted at the participating centres. The  
36  
37 15 investigator will allow direct access to the source data/documents for monitoring, auditing,  
38  
39 16 review by the ethical research committee and inspection by the health authorities.

40  
41  
42 17 **Patient and Public Involvement**

43  
44  
45 18 The development of the research objectives and outcomes are based on the neurologist’s  
46  
47 19 experience treating this profile of patients and the desire to optimise brain tissue repair  
48  
49 20 therapies. Patients and their advisors were not involved in the design, recruitment or conduct of  
50  
51 21 this study.

52  
53  
54 22 **SUMMARY**

55  
56  
57 23 AD-MSCs administered intravenously in the first days from stroke symptom onset could be a  
58  
59 24 safe and promising therapy to enhance recovery from brain ischaemia and to help reduce  
60

1  
2  
3 1 disability. This type of cell therapy has already demonstrated its efficacy and safety in  
4  
5 2 preclinical research, but further studies are needed to prove similar results in patients with  
6  
7 3 stroke. The advantages of AD-MSCs over other cell types are their accessibility and abundance,  
8  
9 4 as well as their low immunogenicity. An intravenous infusion appears to be the most  
10  
11 5 appropriate manner of administration, given it is the least aggressive, and cell therapies can be  
12  
13 6 performed by modification of trophic factors and immunomodulation.

14  
15  
16 7 This clinical trial aims to demonstrate that early intravenous administration of AD-MSCs has no  
17  
18 8 major safety complications and that it could possibly reduce disability due to stroke. Also,  
19  
20 9 analysis of blood biomarkers and trophic factors will help elucidate and deepen our  
21  
22 10 understanding of the mechanisms of action of cell therapy, along with previous results from  
23  
24 11 other clinical trials.[24,25] The results of the AMASCIS-02 trial, together with those from the  
25  
26 12 AMASCIS-01 trial, will increase our knowledge of the safety of intravenous AD-MSC  
27  
28 13 administration in patients with ischaemic stroke. We will then be able to conduct larger clinical  
29  
30 14 trials to evaluate their efficacy and possibly enable their use in clinical practice in the near  
31  
32 15 future.

## 33 34 35 36 16 **DECLARATIONS**

### 37 38 39 17 **Conflicts of Interest**

40  
41  
42 18 There are no competing interests for any author.

### 43 44 45 19 **Funding**

46  
47 20 This clinical trial has been promoted by the La Paz University Hospital Institute for Health  
48  
49 21 Research – IdiPAZ (La Paz University Hospital – Autonomous University of Madrid) and  
50  
51 22 sponsored from a competitive grant from the Carlos III Health Institute Health Care Research  
52  
53 23 Fund, and co-funded by the European Regional Development Fund (ERDF) “A way to make  
54  
55 24 Europe”/”Investing in your future” (PIC18/00016). This clinical trial has been supported by  
56  
57 25 Plataforma Española de Investigación Clínica y Ensayos Clínicos, SCReN (Spanish Clinical  
58  
59  
60



1  
2  
3 1 Research Network), funded by Carlos III Health Institute-General Subdirection for Evaluation  
4  
5 2 and Promotion of Research, research PT17/0017/0013. State Plan for Scientific Investigation,  
6  
7 3 Technology and Innovation (2017–2020). Co-funded by European Regional Development  
8  
9 4 Fund/European Social fund “A way to make Europe”/“Investing in your future” (grant ID  
10  
11 5 PT17/0017/0013). The Funders and Sponsor will not interfere in the selection processes of  
12  
13 6 patients, analysis of data and/or publication of the results, or in any other process that might  
14  
15 7 interfere with the results of the study. Funding will be independent of the results of the study.  
16  
17 8 The Principal Investigator has ultimate authority over any of these activities.

## 9 **Ethics and dissemination**

10 Research ethics approval: The researchers will adhere strictly to the provisions of this protocol  
11 and will complete the case report forms. The study will be performed according to the  
12 recommendations for clinical studies and the evaluation of drugs in humans, as contained in the  
13 Declaration of Helsinki (revised in successive world assemblies) and in the current Spanish and  
14 European legislation on clinical studies and patient data confidentiality. The study will follow  
15 the principles of Good Clinical Practice. This study (protocol version 2, dated 5 May 2020) has  
16 been approved by the Clinical Research Ethics Committee of La Paz University Hospital  
17 (Madrid, Spain) and by the Spanish Agency of Medication and Health Products, and has been  
18 registered in Eudra CT (2019-001724-35) and ClinicalTrials.gov (NCT04280003).

19 Protocol amendments: All protocol amendments will be evaluated by the Ethics Committee and  
20 the Spanish Agency of Medication and Health Products, following the principles of Good  
21 Clinical Practice and national legislation. All modifications of the study protocol will be  
22 communicated by updating the trial registry at ClinicalTrials.gov (NCT04280003).

23 Consent to participate: Informed consent will be obtained by a recruiting investigator for all  
24 individual participants included in this study, or by their family member/representative (if the  
25 patient has aphasia or altered consciousness at that moment). Re-consent from the patient will  
26 be obtained whenever possible if initial consent was provided by family

1 members/representatives. The informed consent document is written in Spanish. The informed  
2 consent documents are available as supplementary files.

3 Consent for publication: According to the Royal Decree 1090/2015, the results of this clinical  
4 trial will be published once the study is completed in an Open Access format.

5 Confidentiality: All participant information as well as the electronic database will remain in  
6 secure storage at both study centres during the trial and up to 25 years after its finalisation.

7 Access to data: All investigators and each centres' monitor will have access to the electronic  
8 trial data during the data collection period; after completion of the study, the data will also be  
9 accessible to statisticians. Only the blinded study nurses and Histocell will have access to  
10 randomisation codes until the data collection period is complete.

11 Availability of data and material: Data will be available from the corresponding author on  
12 reasonable request, if it is considered compliant with the General Data Protection Regulation  
13 and the data-sharing agreement is approved by the relevant Spanish authorities. Upon study  
14 finalisation, anonymised individual patient data will be available on a public repository of the  
15 Community of Madrid.

16 Ancillary and post-trial care: Patients will be treated during and after the clinical trial is  
17 completed with the best medical treatments according to the state of the art. Participants will not  
18 receive economic benefits beyond compensation from the study insurance company in cases of  
19 study treatment-related adverse events (Hannover seguros España).

20 Dissemination policy: Output from this study will include journal publications, conference  
21 presentations and community reporting. Output will not identify participants.

## 22 **Authors' contributions**

23 The first draft of the manuscript was written by Elena de Celis-Ruiz, and all authors commented  
24 on previous versions of the manuscript. Blanca Fuentes, Exuperio Díez-Tejedor, Francisco

1  
2  
3  
4  
5  
6  
7  
8  
9  
10  
11  
12  
13  
14  
15  
16  
17  
18  
19  
20  
21  
22  
23  
24  
25  
26  
27  
28  
29  
30  
31  
32  
33  
34  
35  
36  
37  
38  
39  
40  
41  
42  
43  
44  
45  
46  
47  
48  
49  
50  
51  
52  
53  
54  
55  
56  
57  
58  
59  
60

1 Moniche, Joan Montaner, Alberto Borobia and María Gutiérrez-Fernández participated in the  
2 study conception and design. All authors have read and approved the final manuscript.

For peer review only

1  
2  
3 **1 REFERENCES**  
4

- 5  
6 [1] GBD 2016 Neurology Collaborators. Global, regional, and national burden of neurological disorders,  
7  
8 1990-2016: a systematic analysis for the Global Burden of Disease Study 2016. *Lancet Neurol.*  
9  
10 2019;18(5):459
- 11  
12 [2] Gutiérrez-Fernández M, Fuentes B, Rodríguez-Frutos B, Ramos-Cejudo J, Vallejo-Cremades MT,  
13  
14 Díez-Tejedor E. Trophic factors and cell therapy to stimulate brain repair after ischaemic stroke. *J Cell*  
15  
16 *Mol Med.* 2012;16:2280-90.
- 17  
18 [3] Bang OY, Kim H, Cha M, Moon J. Adult Stem Cell Therapy for Stroke: Challenges and Progress. *J*  
19  
20 *Stroke.* 2016;18:256-66.
- 21  
22  
23 [4] Krause M, Phan TG, Ma H, Sobey CG, Lim R. Cell-Based Therapies for Stroke: Are We There Yet?  
24  
25 *Front Neurol.* 2019;Jun 25;10:656
- 26  
27 [5] Rodríguez-Frutos B, Otero-Ortega L, Gutierrez-Fernández M, Fuentes B, Ramos-Cejudo, Díez-  
28  
29 Tejedor E. Stem Cell Therapy and Administration Routes After Stroke. *Transl Stroke Res* 2016;7:378-87.
- 30  
31 [6] Savitz SI. Developing Cellular Therapies for Stroke. *Stroke.* 2015;46:2026-31
- 32  
33 [7] Vu Q, Xie K, Eckert M, Zhao W, Cramer SC. Meta-analysis of preclinical studies of mesenchymal  
34  
35 stromal cells for ischemic stroke. *Neurology.* 2014;82:1277-86
- 36  
37 [8] Lalu MM, Montroy J, Dowlatshahi D, Hutton B, Juneau P, Wesch N, et al. From the Lab to Patients a  
38  
39 Systematic Review and Meta-Analysis of Mesenchymal Stem Cell Therapy for Stroke. *Transl Stroke Res.*  
40  
41 2020 Jun;11(3):345-364
- 42  
43 [9] Sarmah D, Agrawal V, Rane P, Bhute S, Watanabe M, Kalia K, et al. Mesenchymal Stem Cell  
44  
45 Therapy in Ischemic Stroke: A Meta-analysis of Preclinical Studies. *Clin Pharmacol Ther.*  
46  
47 2018;103(6):990-8.
- 48  
49 [10]. Cui L li, Golubczyk D, Tolppanen AM, Boltze J, Jolkkonen J. Cell therapy for ischemic stroke: Are  
50  
51 differences in preclinical and clinical study design responsible for the translational loss of efficacy? *Ann*  
52  
53 *Neurol.* 2019;86(1):5-16.  
54  
55  
56  
57  
58  
59  
60

1  
2  
3  
4  
5  
6  
7  
8  
9  
10  
11  
12  
13  
14  
15  
16  
17  
18  
19  
20  
21  
22  
23  
24  
25  
26  
27  
28  
29  
30  
31  
32  
33  
34  
35  
36  
37  
38  
39  
40  
41  
42  
43  
44  
45  
46  
47  
48  
49  
50  
51  
52  
53  
54  
55  
56  
57  
58  
59  
60

- 1 [11] Xue P, Wang M, Yan GH. Mesenchymal stem cell transplantation as an effective treatment strategy  
2 for ischemic stroke in Asia: A meta-analysis of controlled trials. *Ther Clin Risk Manag*. 2018;14:909–28.
- 3 [12] Hess DC, Wechsler LR, Clark WM, Savitz SI, Ford GA, Chiu D, et al. Safety and efficacy of  
4 multipotent adult progenitor cells in acute ischaemic stroke (MASTERS): a randomised, double-blind,  
5 placebo-controlled, phase 2 trial. *Lancet Neurol*. 2017;16:360-8.
- 6 [13] Gutierrez-Fernandez M, Otero-Ortega L, Ramos-Cejudo J, Rodriguez-Frutos B, Fuentes B, Díez-  
7 Tejedor E. Adipose tissue-derived mesenchymal stem cells as a strategy to improve recovery after stroke.  
8 *Expert Opin Biol Ther*. 2015;15:873-81.
- 9 [14] Lee SH, Jin KS, Bang OY, Kim BJ, Park SJ, Lee NH, et al. Differential migration of mesenchymal  
10 stem cells to ischemic regions after middle cerebral artery occlusion in rats. *PLoS One*. 2015;10:1-11.
- 11 [15]. Chang K-A, Lee J-H, Suh Y-H. Therapeutic potential of human adipose-derived stem cells in  
12 neurological disorders. *J Pharmacol Sci*. 2014;126:293-301.
- 13 [16] Gutierrez-Fernandez M, Rodríguez-Frutos B, Otero-Ortega L, Ramos-Cejudo J, Fuentes B, Díez-  
14 Tejedor E. Adipose tissue-derived stem cells in stroke treatment: from bench to bedside. *Discov Med*.  
15 2013;16:37-43.
- 16 [17] Gutiérrez-Fernández M, Rodríguez-Frutos B, Ramos-Cejudo J, Teresa Vallejo-Cremades M, Fuentes  
17 B, Cerdán S, et al. Effects of intravenous administration of allogenic bone marrow- and adipose tissue-  
18 derived mesenchymal stem cells on functional recovery and brain repair markers in experimental  
19 ischemic stroke. *Stem Cell Res Ther*. 2013;4:11.
- 20 [18] Gómez -de Frutos M, Laso-García F, Diekhart L, Otero-Otega L et al. Intravenous delivery of  
21 adipose tissue-derived mesenchymal stem cells improves brain repair in hyperglucemic stroke rats. *Stem*  
22 *Cell Research and Therapy*. 2019; 10(1): 1-13
- 23 [19] Díez-Tejedor E, Gutiérrez-Fernández M, Martínez-Sánchez P, Rodríguez-Frutos B, Ruiz- Ares G,  
24 Lara ML, et al. Reparative Therapy for Acute Ischemic Stroke with Allogeneic Mesenchymal Stem Cells  
25 from Adipose Tissue: A Safety Assessment: A Phase II Randomized, Double-blind, Placebo-controlled,  
26 Single-center, Pilot Clinical Trial. *J Stroke Cerebrovasc Dis*. 2014;23:2694-700.
- 27 [20] <http://dx.doi.org/10.2139/ssrn.3420416>

- 1  
2  
3 1 [21] Hirano A, Sano M, Urushihata N, Tanemura H, Oki K, Suzuki E. Assessment of safety and  
4  
5 2 feasibility of human allogeneic adipose-derived mesenchymal stem cells in a pediatric patient. *Pediatr*  
6  
7 3 *Res* [Internet]. 2018;(April):575–7.  
8  
9  
10 4 [22] Zheng G, Huang L, Tong H, Shu Q, Hu Y, Ge M, et al. Treatment of acute respiratory distress  
11  
12 5 syndrome with allogeneic adipose-derived mesenchymal stem cells: a randomized, placebo-controlled  
13  
14 6 pilot study. *Respir Res*. 2014;15:39.  
15  
16 7 [23] Álvaro-Gracia JM, Jover JA, García-Vicuña R, Carreño L, Alonso A, Marsal S, et al. Intravenous  
17  
18 8 administration of expanded allogeneic adipose-derived mesenchymal stem cells in refractory rheumatoid  
19  
20 9 arthritis (Cx611): results of a multicentre, dose escalation, randomised, single-blind, placebo-controlled  
21  
22 10 phase Ib/IIa clinical trial. *Ann Rheum Dis*.2017;76:196-202.  
23  
24 11 [24] Moniche F, Gonzalez A, Gonzalez-Marcos JR, Carmona M, Piñero P, Espigado I, et al. Intra-arterial  
25  
26 12 bone marrow mononuclear cells in ischemic stroke: A pilot clinical trial. *Stroke*. 2012;43(8):2242–4.  
27  
28  
29 13 [25] Moniche F, Montaner J, Gonzalez-Marcos JR, Carmona M, Piñero P, Espigado I, et al. Intra-arterial  
30  
31 14 bone marrow mononuclear cell transplantation correlates with GM-CSF, PDGF-BB, and MMP-2 Serum  
32  
33 15 levels in stroke patients: Results from a clinical trial. *Cell Transplant* [Internet]. 2014;23(13):S57–64.  
34  
35 16 Available from: <https://doi.org/10.3727/096368914X684934>  
36  
37  
38  
39  
40  
41  
42  
43  
44  
45  
46  
47  
48  
49  
50  
51  
52  
53  
54  
55  
56  
57  
58  
59  
60

1  
2  
3  
4  
5  
6  
7  
8  
9  
10  
11  
12  
13  
14  
15  
16  
17  
18  
19  
20  
21  
22  
23  
24  
25  
26  
27  
28  
29  
30  
31  
32  
33  
34  
35  
36  
37  
38  
39  
40  
41  
42  
43  
44  
45  
46  
47  
48  
49  
50  
51  
52  
53  
54  
55  
56  
57  
58  
59  
60



Figure 1. Schematic flowchart of the clinical trial

338x190mm (600 x 600 DPI)

Código de protocolo: AMASCIS 02  
Versión 3.0 de 08 de Mayo de 2020

## HOJA DE INFORMACIÓN PARA EL PARTICIPANTE

**TÍTULO DEL ESTUDIO:** ADMINISTRACIÓN INTRAVENOSA DE CÉLULAS TRONCALES MESENQUIMALES ALOGÉNICAS DE TEJIDO ADIPOSEO EN EL INFARTO CEREBRAL AGUDO. ENSAYO CLÍNICO FASE IIB MULTICÉNTRICO Y DOBLE CIEGO CONTROLADO CON PLACEBO.

**CÓDIGO DEL ESTUDIO:** AMASCIS-2

**VERSIÓN:** 3.0 de 8 de mayo de 2020

**PROMOTOR:** Fundación para la Investigación Biomédica del Hospital Universitario de La Paz (FIBHULP)

**INVESTIGADOR COORDINADOR:** Exuperio Díez Tejedor.

**CENTRO:** \_\_\_\_\_

### INTRODUCCIÓN

Nos gustaría invitarle a participar en este estudio clínico. Antes de decidir si participar en este estudio, tómese todo el tiempo que necesite para revisar toda la información y pregunte todo lo que quiera. El estudio ha sido aprobado por un Comité de Ética con medicamentos y por la Agencia Española de Medicamentos y Productos Sanitarios, de acuerdo con la legislación vigente. Antes de aceptar su participación en este estudio debe comprender por completo por qué se está realizando el estudio y lo que va a implicar. Debe preguntarle al médico si existen otros tratamientos disponibles para su enfermedad. No debe consentir su participación a menos que esté completamente de acuerdo con todos los procedimientos implicados.

### ANTECEDENTES Y OBJETIVO DEL ESTUDIO

Le estamos solicitando participar en este ensayo clínico porque ha padecido un ictus agudo. Un ictus está provocado por una obstrucción del flujo sanguíneo a una parte del cerebro. Algunas de las células del área del cerebro que no reciben sangre se mueren inmediatamente. Además, después del ictus en el cerebro se producen una serie de procesos nocivos que provocan que se mueran más células cerebrales. Esto supone que las secuelas provocadas por el ictus podrían aumentar. Pero también se activan procesos que intentan reparar el daño, en la mayoría de las ocasiones son insuficientes para conseguir mejorar el pronóstico.

Las células troncales (también conocidas como células madre) son células inmaduras con capacidad de autoregenerarse y de diferenciarse en múltiples tipos celulares. Hasta ahora se han ensayado tratamientos basados en la administración de células troncales en varias enfermedades neurológicas. La administración intravenosa de células troncales



Código de protocolo: AMASCIS 02  
Versión 3.0 de 08 de Mayo de 2020

mesenquimales autólogas ha sido factible y segura, y se ha sugerido una mejoría en la recuperación neurológica en pacientes con infarto cerebral grave. Además, se ha constatado la seguridad de este tratamiento a los 5 años de su administración. En el estudio AMASCIS-01, similar al que se le invita a participar, se incluyeron 19 pacientes y se llegó a administrar las células a 4 de ellos sin que se detectara ningún efecto adverso relacionado con su administración

El objetivo de este estudio de investigación es evaluar la seguridad del tratamiento alogénico (procedentes de un donante) precoz con células troncales procedentes de tejido adiposo en pacientes que han sufrido un ictus agudo. También se recogerán datos sobre su posible eficacia en la reducción de secuelas.

## DESARROLLO DEL ESTUDIO

Si usted consiente su participación en el estudio, usted deberá firmar este formulario de consentimiento informado. Su médico realizará algunas pruebas médicas y otros procedimientos para determinar si usted reúne los requisitos para participar en el estudio. Deberá informar si ha padecido problemas médicos en el pasado. Como parte del estudio habitual en pacientes con ictus agudo se le practicará una exploración general y neurológica, incluyendo mediciones de la presión arterial, el pulso, la temperatura, la glucosa en sangre capilar, la saturación de oxígeno y se le realizará un electrocardiograma. Se le tomará una muestra sanguínea para realizar pruebas generales de laboratorio. No podrá participar en el estudio en caso de embarazo o lactancia. En los casos de mujeres en edad fértil sólo podrán participar en el estudio si la prueba de embarazo es negativa en el momento de su inclusión en el estudio y si aceptan usar métodos anticonceptivos adecuados y efectivos (dispositivos intrauterinos no hormonales, oclusión tubárica bilateral, pareja vasectomizada o abstinencia sexual) durante la duración del mismo (24 meses). Previo a su inclusión en este estudio, se le habrá realizado una tomografía computarizada (TC) craneal o una resonancia magnética (RM) cerebral como parte del estudio habitual del ictus, en las cuales se habrá verificado que usted tiene un infarto cerebral.

Se prevé que un total de 30 personas participen en el estudio. Si reúne los requisitos para participar, la duración de su participación en el mismo será de aproximadamente 24 meses. Se le asignará aleatoriamente (como cara o cruz, o sacando un número de un bombo) a recibir el fármaco del estudio (células troncales mesenquimales) o placebo. El placebo es una sustancia que tiene el aspecto del fármaco del estudio pero no contiene sustancia farmacológicamente activa, por lo que no se espera que tenga efecto. Tendrá un 50% de posibilidades de recibir el fármaco del estudio o un 50% de posibilidades de recibir el placebo. Ni usted ni el médico del estudio sabrán si está recibiendo el fármaco del estudio o el placebo. Sin embargo, el médico del estudio podrá identificar su tratamiento en caso de emergencia médica.

Código de protocolo: AMASCIS 02  
Versión 3.0 de 08 de Mayo de 2020

El fármaco del estudio o el placebo se administrarán por vía intravenosa (a través de una pequeña vía de perfusión colocada en la vena de su brazo) en una sola dosis alrededor del cuarto día desde el inicio del ictus, mientras permanece hospitalizado. Todos los pacientes recibirán el tratamiento convencional del infarto cerebral de acuerdo a las actuales guías de práctica clínica y vías al uso. Como pruebas adicionales al manejo y tratamiento convencional del ictus, al participar en el estudio se le extraerán en 3 ocasiones muestras de sangre adicionales para el análisis de sustancias relacionadas con la recuperación y regeneración del tejido cerebral.

El estudio tendrá una duración total de **24 meses**, estando previstas **10 visitas**

**Primera visita:** Tras comprobar que usted cumple los criterios de inclusión y ninguno de los de exclusión para participar en este ensayo, el médico le informará acerca del estudio y le pedirá su consentimiento por escrito. Se le preguntará por su estado funcional previo (actividades que antes del ictus podía realizar de forma independiente o si requería alguna ayuda), y se le realizará un examen clínico que incluirá una medición de las constantes vitales, una exploración clínica general completa y una exploración neurológica detallada. En el caso de las mujeres en edad fértil se realizará además un test de embarazo. Se registrarán los resultados de las pruebas ya realizadas como parte de la práctica clínica habitual en el ictus. La asignación aleatoria de la administración del fármaco del estudio o del placebo se realizará también en esta visita.

**Segunda visita:** Tendrá lugar en el momento de administración del fármaco. Se repararán los criterios para la participación en el ensayo. Se le realizará un examen clínico general y una exploración neurológica detallada. Se realizará un nuevo electrocardiograma. Adicionalmente se le tomará una muestra de sangre para analizar sustancias relacionadas con la recuperación y reparación del tejido cerebral tras un infarto cerebral. Cualquier evento adverso se registrará.

**Tercera visita:** tendrá lugar a las 2 horas de la finalización del tratamiento por vía intravenosa e incluirá la medición de las constantes vitales y una exploración neurológica detallada (escala NIHSS), así como el registro de cualquier acontecimiento adverso.

**Cuarta y quinta visitas:** se realizarán a las 24h y a los 7 días (o alta hospitalaria en caso de que ocurra antes del día 7) desde la administración del fármaco. Se le realizará una medición de las constantes vitales, así como una exploración clínica general y neurológica detalladas. Se anotarán todos los fármacos que haya recibido además del fármaco del estudio. Se realizará un nuevo electrocardiograma en la cuarta visita y se tomarán muestras de sangre para asegurarnos de su seguridad durante el estudio, además de analizar las sustancias involucradas en regeneración cerebral en la quinta visita. Cualquier evento adverso se registrará

Código de protocolo: AMASCIS 02  
Versión 3.0 de 08 de Mayo de 2020

**Sexta visita:** Se realiza en el mes 3 desde su inclusión en el estudio. Se le realizará una exploración clínica general y neurológica detallada. Se extraerán de nuevo muestras de sangre para analizar las sustancias relacionadas con la regeneración cerebral. Se registrarán los posibles acontecimientos adversos ocurridos y los fármacos que esté usted tomando en ese momento

**Séptima a novena visitas:** se realizarán a los 6, 12, y 18 meses desde su inclusión en el estudio. De nuevo se realizará una exploración clínica y neurológica completas y se anotarán las posibles reacciones adversas y los fármacos que esté usted tomando.

**Última visita:** se realizará a los 24 meses. Se repetirá una exploración clínica y neurológica completas. Adicionalmente se realizará una analítica y un electrocardiograma de 12 derivaciones. De nuevo, será preguntado por los fármacos que haya precisado tomar desde la última visita, y se registrará cualquier evento adverso.

## **RIESGOS POSIBLES**

Estudios previos han observado que la infusión intravenosa de células troncales mesenquimales alogénicas es factible y segura, y se ha sugerido una mejoría en la recuperación de las secuelas en pacientes con infarto cerebral grave. Además se ha constatado la seguridad de este tratamiento a los 5 años del tratamiento. El uso de estas células administradas por vía intravenosa en pacientes con otras enfermedades diferentes al ictus también ha sido seguro, siendo los efectos adversos más frecuentes fiebre (<30%), malestar general (10%), síntomas similares a una gripe (10%), infecciones de orina (<35%), infecciones respiratorias (<30%), otitis (<10%), erupción cutánea (<10%), debilidad muscular (<10%), náuseas (<20%), vómitos (<20%), diarrea (<10%), caries dental (<10%), anemia (<10%). Una revisión de 70 estudios con administración de células troncales del tejido adiposo en 1474 pacientes con otras enfermedades distintas al ictus observaron muy pocos efectos adversos relacionados directamente con la terapia celular. No se ha observado incremento del riesgo de cáncer ni de tromboembolismo pulmonar. Sin embargo, puesto que se trata de un fármaco experimental (aún no se encuentra autorizado o comercializado), pueden existir otros efectos secundarios y riesgos que aún no hayan sido descritos. No se espera que ocurran efectos adversos con el placebo, al ser una sustancia no activa farmacológicamente.

La extracción de sangre de su brazo puede provocar dolor, moratones y en pocas ocasiones una infección.

## **BENEFICIOS POSIBLES**

En algún estudio anterior, el tratamiento con células troncales se asoció con una mejoría en la recuperación neurológica en algunos pacientes con infarto cerebral grave. Sin embargo, no es posible predecir ni garantizar si este fármaco en estudio ayudará a mejorar su enfermedad. Sus síntomas pueden mejorar, seguir igual o empeorar. En

Código de protocolo: AMASCIS 02  
Versión 3.0 de 08 de Mayo de 2020

cualquier caso, su participación en el estudio puede ayudar a otros pacientes que sufran ictus en el futuro.

## **TRATAMIENTOS ALTERNATIVOS**

Usted recibirá todos los tratamientos actualmente establecidos en el infarto cerebral agudo que requiera según las características de su infarto cerebral (tipo de infarto y duración de los síntomas). Existen otros tratamientos en experimentación diseñados para proteger y reparar el cerebro en los infartos cerebrales, pero ninguno de ellos cuenta todavía con aprobación para su utilización en pacientes fuera de estudios de investigación como el que le proponemos.

## **DEBERES DEL PARTICIPANTE DEL ESTUDIO**

Como participante en el estudio, está obligado a respetar las instrucciones médicas del médico del estudio, informar detalladamente a su médico de la evolución de su enfermedad y de cualquier malestar o dolencia que pueda observar, así como de los tratamientos que esté tomando prescritos por otro médico y de aquellos comprados sin receta, incluyendo los tratamientos homeopáticos y suplementos vitamínicos.

## **NUEVAS INFORMACIONES**

Si aparece cualquier nueva información sobre la seguridad del tratamiento con células troncales mesenquimales alogénicas, le informaremos a usted o a su representante legal autorizado para que pueda decidir si desea continuar con su participación en este estudio de investigación. Si decide seguir participando en el estudio tras haber recibido esta nueva información, se le pedirá que firme un documento actualizado de consentimiento. Si decide retirarse del estudio, esto no tendrá repercusión sobre el tratamiento que reciba en el futuro por su enfermedad.

## **INTERRUPCIÓN PRECOZ DEL ESTUDIO**

Su participación en este estudio de investigación es voluntaria. Puede negarse a participar o abandonar su participación en cualquier momento, sin ningún tipo de penalización y la calidad de su atención sanitaria no se verá alterada y recibirá los cuidados habituales que los pacientes con ictus reciben en su hospital. El médico del estudio puede poner fin a su participación en el estudio en caso de una reacción inesperada, si usted incumple las instrucciones dadas por el personal del estudio o porque todo el estudio sea interrumpido. Si decide no continuar participando en este estudio, el médico realizará los trámites oportunos para que sus cuidados continúen.

## **OBTENCIÓN Y USO DE MUESTRAS BIOLÓGICAS:**

Su participación en este ensayo clínico conlleva la obtención y utilización de muestras biológicas con fines de investigación, para lo que se observará la Ley 14/2007 de

Código de protocolo: AMASCIS 02  
Versión 3.0 de 08 de Mayo de 2020

investigación biomédica y el Real Decreto 1716/2011, normativas que garantizan el respecto a los derechos que le asisten. Al firmar este documento, revisado y evaluado por el Comité de Ética de la Investigación con medicamentos que ha aprobado este ensayo clínico, usted acepta que se utilicen sus muestras para las finalidades del presente estudio.

Algunas de las muestras se obtienen durante el seguimiento habitual de su enfermedad o proceso; otras son solicitadas porque son necesarias para cumplir con los objetivos de estudio. Entre las pruebas que se obtienen como parte del seguimiento habitual se encuentran análisis de hemograma, coagulación y datos de bioquímica básica; obtenidas en las visitas 1, 4, 5 y 10. Como pruebas adicionales del estudio se encuentran el análisis de factores relacionados con la regeneración y recuperación del tejido cerebral que se obtendrán en las visitas 2, 5 y 6.

Las muestras de sangre que forman parte del estudio habitual del ictus permanecerán almacenadas en el hospital donde se realiza la extracción (Hospital Universitario La Paz u Hospital Universitario Virgen del Rocío); y posteriormente parte de las muestras se analizarán en el Hospital Universitario Virgen Macarena y otra parte en el Hospital Universitario La Paz.

La cantidad extraída en cada análisis de sangre de seguimiento habitual serán tres tubos, mientras que en los análisis específicos del estudio serán cinco tubos. Cada tubo contiene aproximadamente 2 ml de sangre. Los posibles riesgos derivados del procedimiento realizado para la obtención de estas muestras estarán cubiertos por el seguro del ensayo clínico.

Las muestras estarán asociadas a un código que solo podrá ser relacionado con su identidad por personal autorizado (médicos, enfermeros y personal de laboratorio). Los datos que se deriven de la utilización de estas muestras se tratarán del mismo modo que el resto de datos que se obtengan durante este ensayo (ver apartado confidencialidad y protección de datos personales). Las muestras y los datos asociados se mantendrán bajo las condiciones de seguridad adecuadas y se garantiza que los sujetos no podrán ser identificados a través de medios considerados razonables por personas distintas a las autorizadas.

Durante el desarrollo del ensayo sus muestras pueden ser analizadas en diversos laboratorios y se mantendrán almacenadas durante 10 años, en previsión de que fuera necesario repetir algún análisis adicional relacionado con los objetivos del estudio. Durante este tiempo, el responsable de las muestras será el promotor del ensayo. En caso de conservación para usos futuros de las muestras, se mantendrán almacenadas en el Instituto de Genética Médica y Molecular (INGEMM), Sección de Farmacogenética Hospital Universitario La Paz, durante 10 años. En el caso del Hospital Universitario Virgen Macarena serán almacenadas en su Biobanco

Código de protocolo: AMASCIS 02  
Versión 3.0 de 08 de Mayo de 2020

Una vez finalizado el ensayo, las muestras sobrantes serán destruidas, a no se que usted consienta para que puedan ser almacenadas y utilizadas en futuras investigaciones. La finalidad del almacenamiento de estas muestras es que sean utilizadas en proyectos de investigación en el futuro.

Si cambiara de opinión en relación con la donación de muestras biológicas y la cesión de los datos proporcionados, tiene derecho a solicitar su destrucción o anonimización, a través de su médico/investigador/investigador principal de la colección. No obstante, debe saber que los datos que se hayan obtenido en los análisis realizados hasta ese momento podrán ser utilizados para los fines solicitados y podrán conservarse en cumplimiento de las obligaciones legales correspondientes.

En el caso de que en este ensayo se obtengan datos que pudieran ser clínica o genéticamente relevantes para usted, e interesar a su salud o a la de su familia, podrá solicitar que le sean comunicados por su médico del ensayo si así lo indica en la casilla que aparece al final de este documento. No obstante, si el paciente hubiera indicado su negativa y cuando esta información según criterio del médico responsable, sea necesaria para evitar un grave perjuicio para su salud o la de sus familiares biológicos, se informará a un familiar próximo o a un representante, previa consulta al Comité de Ética Asistencial del centro. La comunicación de esta información se llevará a cabo por profesionales que le podrán explicar adecuadamente su relevancia y las opciones que se pudieran plantear. En caso de información genética clínicamente relevante podrá recibir el preceptivo consejo genético.

Hable con su médico sobre la posibilidad de que pueda establecer restricciones para que su muestra biológica no sea utilizada en determinadas investigaciones.

## **COSTE**

A usted no le costará nada participar en el estudio y no recibirá ningún pago por participar. El coste de la terapia con células troncales la asumirá el hospital promotor del estudio gracias a una ayuda del Instituto de Salud Carlos III.

## **COMPENSACIÓN**

Todas las pruebas médicas y tratamientos (tanto experimentales como de rutina) implican cierto riesgo de lesión. Si nota o experimenta cualquier lesión relacionada con este estudio clínico, y ha seguido las instrucciones de sus médicos y del resto del personal de estudio, el promotor del mismo cubrirá los gastos médicos para tratar su lesión. No se ofrecerá ninguna compensación si su lesión fuera provocada por un incumplimiento de las instrucciones del personal de la investigación. El promotor no ofrecerá ninguna otra compensación.

## **SEGUROS**



Código de protocolo: AMASCIS 02  
Versión 3.0 de 08 de Mayo de 2020

El hospital promotor del estudio ha contratado una póliza de seguro de Responsabilidad Civil con la compañía Hannover Seguros España.

## **CONFIDENCIALIDAD Y PROTECCIÓN DE DATOS PERSONALES:**

El tratamiento, la comunicación y la cesión de los datos de carácter personal de todos los pacientes participantes se ajustará a lo dispuesto en el Reglamento (UE) 2016/679 del Parlamento europeo y del Consejo de 27 de abril de 2016 de Protección de Datos (RGPD).

-De acuerdo con lo que establece la legislación mencionada, usted puede ejercer los derechos de acceso, rectificación, oposición y supresión de sus datos, para lo cual deberá dirigirse a su médico del estudio. También puede limitar el tratamiento de datos que sean incorrectos, solicitar una copia o que se trasladen a un tercero (portabilidad) los datos que usted ha facilitado para el estudio. Para ejercitar sus derechos, diríjase al investigador principal del estudio o al Delegado de Protección de datos del centro: José Manuel Laperal González (tfno:91426998/e-mail: protecciondedatos.sanidad@madrid.org).

Le recordamos que los datos no se pueden eliminar aunque deje de participar en el ensayo para garantizar la validez de la investigación y cumplir con los deberes legales y los requisitos de autorización de medicamentos. Si usted decide retirar el consentimiento para participar en este estudio, ningún dato nuevo será añadido a la base de datos, pero sí se utilizarán los que ya se hayan recogido. Así mismo tiene derecho a dirigirse a la Agencia de Protección de Datos si no quedara satisfecho

Tanto el Centro como el Promotor son responsables respectivamente del tratamiento de sus datos y se comprometen a cumplir con la normativa de protección de datos en vigor. Los datos recogidos para el estudio estarán identificados mediante un código, de manera que no se incluya información que pueda identificarle, y sólo su médico del estudio/colaboradores podrá relacionar dichos datos con usted y con su historia clínica. Por lo tanto, su identidad no será revelada a ninguna otra persona salvo a las autoridades sanitarias, cuando así lo requieran o en casos de urgencia médica. Los Comités de Ética de la Investigación, los representantes de la Autoridad Sanitaria en materia de inspección y el personal autorizado por el Promotor, únicamente podrán acceder para comprobar los datos personales, los procedimientos del estudio clínico y el cumplimiento de las normas de buena práctica clínica (siempre manteniendo la confidencialidad de la información).

El Investigador y el Promotor están obligados a conservar los datos recogidos para el estudio al menos hasta 25 años tras su finalización. Posteriormente, su información personal solo se conservará por el centro para el cuidado de su salud y por el promotor para otros fines de investigación científica si usted hubiera otorgado su consentimiento para ello, y si así lo permite la ley y requisitos éticos aplicables.

Código de protocolo: AMASCIS 02  
Versión 3.0 de 08 de Mayo de 2020

Si realizáramos transferencia de sus datos codificados fuera de la UE a las entidades de nuestro grupo, a prestadores de servicios o a investigadores científicos que colaboren con nosotros, los datos del participante quedarán protegidos con salvaguardas tales como contratos u otros mecanismos por las autoridades de protección de datos. Si el participante quiere saber más al respecto, puede contactar al/a la Delegado/a de Protección de Datos del promotor o la institución Delegado/a de Protección de Datos del promotor o la institución. Alaro Avant, S.L. Avda. de Brasil 17, 7G, 28020, Madrid dpo.fiblapaz@alaroavant.com; 91112396.

### **APROBACIÓN DEL ESTUDIO:**

Conforme a la legislación en España, este estudio ha sido revisado y aprobado por el Comité Ético de investigación Clínica (CEIC) del Hospital la Paz.

Además, la Agencia española de medicamentos y Productos Sanitarios (AEMPS) ha dado su autorización para la realización de esta investigación.

### **CONTACTO:**

Si desea hacernos alguna pregunta o consulta no dude en contactar con el Dr..... del Servicio de Neurología del Hospital ..... (Teléfono: .....)



Código de protocolo: AMASCIS 02  
Versión 3.0 de 08 de Mayo de 2020

1  
2  
3  
4  
5  
6  
7  
8  
9  
10  
11  
12  
13  
14  
15  
16  
17  
18  
19  
20  
21  
22  
23  
24  
25  
26  
27  
28  
29  
30  
31  
32  
33  
34  
35  
36  
37  
38  
39  
40  
41  
42  
43  
44  
45  
46  
47  
48  
49  
50  
51  
52  
53  
54  
55  
56  
57  
58  
59  
60

For peer review only

Código de protocolo: AMASCIS 02  
Versión 3.0 de 08 de Mayo de 2020

## CONSENTIMIENTO INFORMADO PARA EL PARTICIPANTE

**TÍTULO DEL ESTUDIO:** ADMINISTRACIÓN INTRAVENOSA DE CÉLULAS TRONCALES MESENQUIMALES ALOGÉNICAS DE TEJIDO ADIPOSEO EN EL INFARTO CEREBRAL AGUDO. ENSAYO CLÍNICO FASE IIB MULTICÉNTRICO Y DOBLE CIEGO CONTROLADO CON PLACEBO.

**CÓDIGO DEL ESTUDIO:** AMASCIS-2

**VERSIÓN:** 3.0 de 8 de mayo de 2020

**PROMOTOR:** Fundación para la Investigación Biomédica del Hospital Universitario de La Paz (FIBHULP)

**INVESTIGADOR COORDINADOR:** Exuperio Díez Tejedor.

**CENTRO:** \_\_\_\_\_  
\_\_\_\_\_

Yo (nombre y apellidos del participante)

.....

- He leído la hoja de información que se me ha entregado.
- He podido hacer preguntas sobre el estudio.
- He recibido suficiente información sobre el estudio.

He hablado con el Dr.....

Comprendo que mi participación es voluntaria.

Comprendo que puedo retirarme del estudio:

1. Cuando quiera.
2. Sin tener que dar explicaciones.
3. Sin que esto repercuta en mis cuidados médicos.

Deseo que la información derivada de la investigación que pueda ser relevante para mi salud me sea comunicada.

SI       NO

Consiento el almacenamiento y uso de las muestras biológicas y de los datos asociados para futuras investigaciones en las condiciones explicadas en la hoja de información al paciente.

SI       NO

Consiento ser contactado en el caso de necesitar más información o muestras biológicas adicionales

SI      \_NO

Código de protocolo: AMASCIS 02  
Versión 3.0 de 08 de Mayo de 2020

Recibiré una copia firmada y fechada de este documento de consentimiento informado.

Presto libremente mi conformidad para mi participación en el estudio.

**FIRMA DEL PARTICIPANTE**

**FIRMA DEL INVESTIGADOR**

Fecha

Fecha

**FIRMA DEL TESTIGO (si procede)**

Fecha

For peer review only

Código de protocolo: AMASCIS 02  
Versión 3.0 de 08 de Mayo de 2020

## HOJA DE INFORMACIÓN PARA EL REPRESENTANTE LEGAL / FAMILIAR DEL PARTICIPANTE

**TÍTULO DEL ESTUDIO:** ADMINISTRACIÓN INTRAVENOSA DE CÉLULAS TRONCALES MESENQUIMALES ALOGÉNICAS DE TEJIDO ADIPOSO EN EL INFARTO CEREBRAL AGUDO. ENSAYO CLÍNICO FASE IIB MULTICÉNTRICO Y DOBLE CIEGO CONTROLADO CON PLACEBO.

**CÓDIGO DEL ESTUDIO:** AMASCIS-2

**VERSIÓN:** 3.0 de 8 de mayo de 2020

**PROMOTOR:** Fundación para la Investigación Biomédica del Hospital Universitario de La Paz (FIBHULP)

**INVESTIGADOR COORDINADOR:** Exuperio Díez Tejedor.

**CENTRO:** \_\_\_\_\_

### INTRODUCCIÓN

Nos gustaría invitar a su representado a participar en este estudio clínico, quien en este momento no se considera en plenas facultades para comprender la información y dar su consentimiento. Antes de decidir si desea que participe en este estudio, tómese todo el tiempo que necesite para revisar toda la información y pregunte todo lo que quiera. El estudio ha sido aprobado por un Comité de Ética con medicamentos y por la Agencia Española de Medicamentos y Productos Sanitarios, de acuerdo con la legislación vigente. Antes de aceptar la participación de su representado en este estudio debe comprender por completo por qué se está realizando el estudio y lo que va a implicar. Debe preguntarle al médico si existen otros tratamientos disponibles para la enfermedad de su representado. No debe consentir su participación a menos que esté completamente de acuerdo con todos los procedimientos implicados.

### ANTECEDENTES Y OBJETIVO DEL ESTUDIO

Estamos solicitando que su representado participe en este ensayo clínico porque ha padecido un ictus agudo. Un ictus está provocado por una obstrucción del flujo sanguíneo a una parte del cerebro. Algunas de las células del área del cerebro que no reciben sangre se mueren inmediatamente. Además, después del ictus, en el cerebro se producen una serie de procesos nocivos que provocan que se mueran más células cerebrales. Esto supone que las secuelas provocadas por el ictus podrían aumentar. Pero también se activan procesos que intentan reparar el daño, en la mayoría de las ocasiones son insuficientes para conseguir mejorar el pronóstico.

Las células troncales, también conocidas como células madre, son células inmaduras con capacidad de autoregenerarse y de diferenciarse en múltiples tipos celulares. Hasta ahora

Código de protocolo: AMASCIS 02  
Versión 3.0 de 08 de Mayo de 2020

se han ensayado tratamientos basados en la administración de células troncales en varias enfermedades neurológicas. La administración intravenosa de células troncales mesenquimales autólogas ha sido factible y segura, y se ha sugerido una mejoría en la recuperación neurológica en pacientes con infarto cerebral grave. Además, se ha constatado la seguridad de este tratamiento a los 5 años de su administración. En el estudio AMASCIS-01, similar al que se le invita a participar, se incluyeron 19 pacientes y se llegó a administrar las células a 4 de ellos sin que se detectara ningún efecto adverso relacionado con su administración

El objetivo de este estudio de investigación es evaluar la seguridad del tratamiento alogénico (procedentes de un donante) precoz con células troncales procedentes de tejido adiposo en pacientes que han sufrido un ictus agudo. También se recogerán datos sobre su posible eficacia en la reducción de secuelas.

## **DESARROLLO DEL ESTUDIO**

Si usted consiente la participación de su representado en el estudio, usted deberá firmar este formulario de consentimiento informado. Su médico realizará algunas pruebas médicas y otros procedimientos para determinar si su representado reúne los requisitos para participar en el estudio. Deberá informar si ha padecido problemas médicos en el pasado. Como parte del estudio habitual en pacientes con ictus agudo se le practicará una exploración general y neurológica, incluyendo mediciones de la presión arterial, el pulso, la temperatura, la glucosa en sangre capilar, la saturación de oxígeno y se le realizará un electrocardiograma. Se le tomará una muestra sanguínea para realizar pruebas generales de laboratorio. Su representado no podrá participar en el estudio en caso de embarazo o lactancia. En caso de que su representado sea una mujer en edad fértil, es necesario que ella se comprometa a usar métodos anticonceptivos adecuados y efectivos (dispositivos intrauterinos no hormonales, oclusión tubárica bilateral, pareja vasectomizada o abstinencia sexual) durante la duración del estudio (24 meses). Previo a la inclusión de su representado en este estudio, se le habrá realizado una tomografía computarizada (TC) craneal o una resonancia magnética (RM) cerebral como parte del estudio habitual del ictus, en las cuales se habrá verificado que tiene un infarto cerebral.

Se prevé que un total de 30 personas participen en el estudio. Si su representado reúne los requisitos para participar, la duración de su participación en el mismo será de aproximadamente 24 meses. Se le asignará aleatoriamente (como cara o cruz, o sacando un número de un bombo) a recibir el fármaco del estudio (células troncales mesenquimales) o placebo. El placebo es una sustancia que tiene el aspecto del fármaco del estudio pero no contiene sustancia farmacológicamente activa, por lo que no se espera que tenga efecto. Su representado tendrá un 50% de posibilidades de recibir el fármaco del estudio y un 50% de posibilidades de recibir el placebo. Ni usted, ni su representado ni el médico del estudio sabrán si está recibiendo el fármaco del estudio o el placebo. Sin embargo, el médico del estudio podrá identificar el tratamiento en caso de emergencia médica.

Código de protocolo: AMASCIS 02  
Versión 3.0 de 08 de Mayo de 2020

El fármaco del estudio o el placebo se administrarán por vía intravenosa (a través de una pequeña vía de perfusión colocada en la vena del brazo) en una sola dosis alrededor del cuarto día desde el inicio del ictus, mientras su representado permanece hospitalizado. Todos los pacientes recibirán el tratamiento convencional del infarto cerebral de acuerdo a las actuales guías de práctica clínica y vías al uso. Como pruebas adicionales al manejo y tratamiento convencional del ictus, al participar en el estudio se le extraerán en 3 ocasiones muestras de sangre adicionales para el análisis de sustancias relacionadas con la recuperación y regeneración del tejido cerebral.

El estudio tendrá una duración total de **24 meses**, estando previstas **10 visitas**

**Primera visita:** Tras comprobar que su representado cumple los criterios de inclusión y ninguno de los de exclusión para participar en este ensayo, el médico le informará a usted acerca del estudio y le pedirá su consentimiento por escrito. Se le preguntará por el estado funcional previo de su representado (actividades que antes del ictus podía realizar de forma independiente o si requería alguna ayuda), y se le realizará un examen clínico que incluirá una medición de las constantes vitales, una exploración clínica completa y una exploración neurológica detallada. En el caso de las mujeres en edad fértil se realizará además un test de embarazo. Se registrarán los resultados de las pruebas ya realizadas como parte de la práctica clínica habitual en el ictus. La asignación aleatoria de la administración del fármaco del estudio o del placebo se realizará también en esta visita.

**Segunda visita:** Tendrá lugar en el momento de administración del fármaco. Se repasarán los criterios para la participación en el ensayo. Se le realizará a su representado un examen clínico general y una exploración neurológica detallada. Se realizará además un nuevo electrocardiograma. Adicionalmente se le tomará una muestra de sangre para analizar sustancias relacionadas con la recuperación y reparación del tejido cerebral tras un infarto cerebral. Cualquier evento adverso se registrará.

**Tercera visita:** tendrá lugar a las 2 horas de la finalización del tratamiento por vía intravenosa e incluirá la medición de las constantes vitales de su representado y una exploración neurológica detallada (escala NIHSS), así como el registro de cualquier acontecimiento adverso.

**Cuarta y quinta visitas:** se realizarán a las 24h y a los 7 días (o alta hospitalaria en caso de que ocurra antes del día 7) desde la administración del fármaco. A su representado se le realizará una medición de las constantes vitales, así como una exploración clínica general y neurológica detalladas. Se anotarán todos los fármacos que haya recibido además del fármaco del estudio. Se realizará un nuevo electrocardiograma en la cuarta visita y se tomarán muestras de sangre para asegurarnos de su seguridad durante el estudio, además de analizar las sustancias involucradas en regeneración cerebral en la quinta visita. Cualquier evento adverso se registrará

Código de protocolo: AMASCIS 02  
Versión 3.0 de 08 de Mayo de 2020

1  
2  
3 **Sexta visita:** Se realiza en el mes 3 desde la inclusión de su representado en el estudio.  
4 Se le realizará una exploración clínica general y neurológica detallada. Se extraerán de  
5 nuevo muestras de sangre para analizar las sustancias relacionadas con la regeneración  
6 cerebral. Se registrarán los posibles acontecimientos adversos ocurridos y los fármacos  
7 que esté tomando en ese momento.  
8  
9

10  
11 **Séptima a novena visitas:** se realizarán a los 6, 12, y 18 meses desde la inclusión de  
12 su representado en el estudio. De nuevo se realizará una exploración clínica general y  
13 neurológica completas y se anotarán las posibles reacciones adversas y los fármacos que  
14 esté tomando.  
15

16  
17 **Última visita:** se realizará a los 24 meses desde la inclusión en el estudio. Se repetirá una  
18 exploración clínica general y neurológica completas. Adicionalmente se realizará una  
19 analítica y un electrocardiograma de 12 derivaciones. De nuevo, será preguntado por los  
20 fármacos que su representado haya precisado tomar desde la última visita, y se registrará  
21 cualquier evento adverso.  
22  
23

## 24 **RIESGOS POSIBLES**

25  
26 Estudios previos han observado que la infusión intravenosa de células troncales  
27 mesenquimales alogénicas es factible y segura, y se ha sugerido una mejoría en la  
28 recuperación de las secuelas en pacientes con infarto cerebral grave. Además se ha  
29 constatado la seguridad de este tratamiento a los 5 años del tratamiento. El uso de estas  
30 células administradas por vía intravenosa en pacientes con otras enfermedades diferentes  
31 al ictus también ha sido seguro, siendo los efectos adversos más frecuentes fiebre (<30%),  
32 malestar general (10%), síntomas similares a una gripe (10%), infecciones de orina  
33 (<35%), infecciones respiratorias (<30%), otitis (<10%), erupción cutánea (<10%),  
34 debilidad muscular (<10%), náuseas (<20%), vómitos (<20%), diarrea (<10%), caries  
35 dental (<10%), anemia (<10%). Una revisión de 70 estudios con administración de  
36 células troncales del tejido adiposo en 1474 pacientes con otras enfermedades distintas al  
37 ictus observaron muy pocos efectos adversos relacionados directamente con la terapia  
38 celular. No se ha observado incremento del riesgo de cáncer ni de tromboembolismo  
39 pulmonar. Sin embargo, puesto que se trata de un fármaco experimental (aún no se  
40 encuentra autorizado o comercializado), pueden existir otros efectos secundarios y  
41 riesgos que aún no hayan sido descritos. No se espera que ocurran efectos adversos con  
42 el placebo, al ser una sustancia no activa farmacológicamente.  
43  
44

45  
46 La extracción de sangre del brazo de su representado puede provocar dolor, moratones y  
47 en pocas ocasiones una infección.  
48  
49  
50  
51  
52  
53  
54  
55  
56  
57  
58  
59  
60



Código de protocolo: AMASCIS 02  
Versión 3.0 de 08 de Mayo de 2020

## **BENEFICIOS POSIBLES**

En algún estudio anterior, el tratamiento con células troncales se asoció con una mejoría en la recuperación neurológica en algunos pacientes con infarto cerebral grave. Sin embargo, no es posible predecir ni garantizar si este fármaco en estudio ayudará a mejorar la enfermedad de su representado. Sus síntomas pueden mejorar, seguir igual o empeorar. En cualquier caso, la participación de su representado en el estudio puede ayudar a otros pacientes que sufran ictus en el futuro.

## **TRATAMIENTOS ALTERNATIVOS**

Su representado recibirá todos los tratamientos actualmente establecidos en el infarto cerebral agudo que requiera según las características de su infarto cerebral (tipo de infarto y duración de los síntomas). Existen otros tratamientos en experimentación diseñados para proteger y reparar el cerebro en los infartos cerebrales, pero ninguno de ellos cuenta todavía con aprobación para su utilización en pacientes fuera de estudios de investigación como el que le proponemos.

## **DEBERES DEL PARTICIPANTE DEL ESTUDIO**

Como participante en el estudio, su representado está obligado a respetar las instrucciones médicas del médico del estudio. Se debe informar detalladamente a su médico de la evolución de su enfermedad y de cualquier malestar o dolencia que se pueda observar, así como de los tratamientos que esté tomando prescritos por otro médico y de aquellos comprados sin receta, incluyendo los tratamientos homeopáticos y suplementos vitamínicos.

## **NUEVAS INFORMACIONES**

Si aparece cualquier nueva información sobre la seguridad del tratamiento con células troncales mesenquimales alogénicas, le informaremos a usted para que pueda decidir si desea que su representante continúe participando en este estudio de investigación. Si decide seguir participando en el estudio tras haber recibido esta nueva información, se le pedirá que firme un documento actualizado de consentimiento. Si decide que se retire del estudio, esto no tendrá repercusión sobre el tratamiento que reciba en el futuro por su enfermedad.

## **INTERRUPCIÓN PRECOZ DEL ESTUDIO**

La participación en este estudio de investigación es voluntaria. Puede negarse a que su representado participe o solicitar que abandone su participación en cualquier momento, sin ningún tipo de penalización. La calidad de su atención sanitaria no se verá alterada y recibirá los cuidados habituales que los pacientes con ictus reciben en su hospital. El



Código de protocolo: AMASCIS 02  
Versión 3.0 de 08 de Mayo de 2020

médico del estudio puede poner fin a la participación de su representado en el estudio en caso de una reacción inesperada, si éste incumple las instrucciones dadas por el personal del estudio o porque todo el estudio sea interrumpido. Si decide que su representado no continúe participando en este estudio, el médico realizará los trámites oportunos para que sus cuidados continúen.

## **OBTENCIÓN Y USO DE MUESTRAS BIOLÓGICAS:**

La participación en este ensayo clínico conlleva la obtención y utilización de muestras biológicas con fines de investigación, para lo que se observará la Ley 14/2007 de investigación biomédica y el Real Decreto 1716/2011, normativas que garantizan el respeto a los derechos que le asisten. Al firmar este documento, revisado y evaluado por el Comité de Ética de la Investigación con medicamentos que ha aprobado este ensayo clínico, usted acepta que se utilicen las muestras procedentes de su representado para las finalidades del presente estudio.

Algunas de las muestras se obtienen durante el seguimiento habitual de la enfermedad o proceso; otras son solicitadas porque son necesarias para cumplir con los objetivos de estudio. Entre las pruebas que se obtienen como parte del seguimiento habitual se encuentran análisis de hemograma, coagulación y datos de bioquímica básica; obtenidas en las visitas 1, 4, 5 y 10. Como pruebas adicionales del estudio se encuentran el análisis de factores relacionados con la regeneración y recuperación del tejido cerebral que se obtendrán en las visitas 2, 5 y 6.

Las muestras de sangre que forman parte del estudio habitual del ictus permanecerán almacenadas en el hospital donde se realiza la extracción (Hospital Universitario La Paz u Hospital Universitario Virgen del Rocío); y posteriormente parte de las muestras se analizarán en el Hospital Universitario Virgen Macarena y otra parte en el Hospital Universitario La Paz.

La cantidad extraída en cada análisis de sangre de seguimiento habitual serán tres tubos, mientras que en los análisis específicos del estudio serán cinco tubos. Cada tubo contiene aproximadamente 2 ml de sangre. Los posibles riesgos derivados del procedimiento realizado para la obtención de estas muestras estarán cubiertos por el seguro del ensayo clínico.

Las muestras estarán asociadas a un código que solo podrá ser relacionado con la identidad de su representado por personal autorizado (médicos, enfermeros y personal de laboratorio). Los datos que se deriven de la utilización de estas muestras se tratarán del mismo modo que el resto de datos que se obtengan durante este ensayo (ver apartado confidencialidad y protección de datos personales). Las muestras y los datos asociados se mantendrán bajo las condiciones de seguridad adecuadas y se garantiza que los sujetos no podrán ser identificados a través de medios considerados razonables por personas distintas a las autorizadas.

Código de protocolo: AMASCIS 02  
Versión 3.0 de 08 de Mayo de 2020

Durante el desarrollo del ensayo las muestras pueden ser analizadas en diversos laboratorios y se mantendrán almacenadas durante 10 años, en previsión de que fuera necesario repetir algún análisis adicional relacionado con los objetivos del estudio. Durante este tiempo, el responsable de las muestras será el promotor del ensayo. En caso de conservación para usos futuros de las muestras, se mantendrán almacenadas en el Instituto de Genética Médica y Molecular (INGEMM), Sección de Farmacogenética Hospital Universitario La Paz, durante 10 años. En el caso del Hospital Universitario Virgen Macarena serán almacenadas en su Biobanco.

Una vez finalizado el ensayo, las muestras sobrantes serán destruidas, a no ser que usted consienta para que puedan ser almacenadas y utilizadas en futuras investigaciones. La finalidad del almacenamiento de estas muestras es que sean utilizadas en proyectos de investigación en el futuro.

Si cambiara de opinión en relación con la donación de muestras biológicas y la cesión de los datos proporcionados, tiene derecho a solicitar su destrucción o anonimización, a través del médico/investigador/investigador principal de la colección. No obstante, debe saber que los datos que se hayan obtenido en los análisis realizados hasta ese momento podrán ser utilizados para los fines solicitados y podrán conservarse en cumplimiento de las obligaciones legales correspondientes.

En el caso de que en este ensayo se obtengan datos que pudieran ser clínica o genéticamente relevantes para su representado, e interesar a su salud o a la de su familia, podrá solicitar que le sean comunicados por su médico del ensayo si así lo indica en la casilla que aparece al final de este documento. No obstante, si usted hubiera indicado su negativa y cuando esta información según criterio del médico responsable, sea necesaria para evitar un grave perjuicio para la salud de su representado o la de sus familiares biológicos, se informará a un familiar próximo o a un representante, previa consulta al Comité de Ética Asistencial del centro. La comunicación de esta información se llevará a cabo por profesionales que le podrán explicar adecuadamente su relevancia y las opciones que se pudieran plantear. En caso de información genética clínicamente relevante podrá recibir el preceptivo consejo genético.

Hable con su médico sobre la posibilidad de que pueda establecer restricciones para que la muestra biológica de su representado no sea utilizada en determinadas investigaciones.

## **COSTE**

Ni a su representado ni a usted les costará nada participar en el estudio y no recibirán ningún pago por participar. El coste de la terapia con células troncales la asumirá el hospital promotor del estudio gracias a una ayuda del Instituto de Salud Carlos III.

## **COMPENSACIÓN**

Código de protocolo: AMASCIS 02  
Versión 3.0 de 08 de Mayo de 2020

Todas las pruebas médicas y tratamientos (tanto experimentales como de rutina) implican cierto riesgo de lesión. Si su representado nota o experimenta cualquier lesión relacionada con este estudio clínico, y se han seguido las instrucciones de sus médicos y del resto del personal de estudio, el promotor del mismo cubrirá los gastos médicos para tratar la lesión. No se ofrecerá ninguna compensación si la lesión fuera provocada por un incumplimiento de las instrucciones del personal de la investigación. El promotor no ofrecerá ninguna otra compensación.

## **SEGUROS**

El hospital promotor del estudio ha contratado una póliza de seguro de Responsabilidad Civil con la compañía Hannover Seguros España.

## **CONFIDENCIALIDAD Y PROTECCIÓN DE DATOS PERSONALES:**

El tratamiento, la comunicación y la cesión de los datos de carácter personal de todos los pacientes participantes se ajustará a lo dispuesto en el Reglamento (UE) 2016/679 del Parlamento europeo y del Consejo de 27 de abril de 2016 de Protección de Datos (RGPD).

-De acuerdo con lo que establece la legislación mencionada, usted puede ejercer los derechos de acceso, rectificación, oposición y supresión de los datos de su representado, para lo cual deberá dirigirse a su médico del estudio. También puede limitar el tratamiento de datos que sean incorrectos, solicitar una copia o que se trasladen a un tercero (portabilidad) los datos que usted ha facilitado para el estudio. Para ejercitar sus derechos, diríjase al investigador principal del estudio o al Delegado de Protección de datos del centro: José Manuel Laperal González [tfno: 91426998/ e-mail: protecciondedatos.sanidad@madrid.org].

Le recordamos que los datos no se pueden eliminar aunque su representado deje de participar en el ensayo para garantizar la validez de la investigación y cumplir con los deberes legales y los requisitos de autorización de medicamentos. Si usted decide retirar el consentimiento para la participación de su representado en este estudio, ningún dato nuevo será añadido a la base de datos, pero sí se utilizarán los que ya se hayan recogido. Así mismo tiene derecho a dirigirse a la Agencia de Protección de Datos si no quedara satisfecho

Tanto el Centro como el Promotor son responsables respectivamente del tratamiento de los datos y se comprometen a cumplir con la normativa de protección de datos en vigor. Los datos recogidos para el estudio estarán identificados mediante un código, de manera que no se incluya información que pueda identificar a su representado, y sólo su médico del estudio/colaboradores podrá relacionar dichos datos con él/ella y con su historia clínica. Por lo tanto, su identidad no será revelada a ninguna otra persona salvo a las autoridades sanitarias, cuando así lo requieran o en casos de urgencia médica. Los Comités de Ética de la Investigación, los representantes de la Autoridad Sanitaria en materia de inspección y el personal autorizado por el Promotor, únicamente podrán

Código de protocolo: AMASCIS 02  
Versión 3.0 de 08 de Mayo de 2020

acceder para comprobar los datos personales, los procedimientos del estudio clínico y el cumplimiento de las normas de buena práctica clínica (siempre manteniendo la confidencialidad de la información).

El Investigador y el Promotor están obligados a conservar los datos recogidos para el estudio al menos hasta 25 años tras su finalización. Posteriormente, la información personal solo se conservará por el centro para el cuidado de la salud de su representado y por el promotor para otros fines de investigación científica si usted hubiera otorgado su consentimiento para ello, y si así lo permite la ley y requisitos éticos aplicables.

Si realizáramos transferencia de los datos de su representado codificados fuera de la UE a las entidades de nuestro grupo, a prestadores de servicios o a investigadores científicos que colaboren con nosotros, los datos del participante quedarán protegidos con salvaguardas tales como contratos u otros mecanismos por las autoridades de protección de datos. Si el participante o usted quiere saber más al respecto, puede contactar al/a la Delegado/a de Protección de Datos del promotor o la institución Delegado/a de Protección de Datos del promotor o la institución. Alaro Avant, S.L. Avda. de Brasil 17, 7G, 28020, Madrid dpo.fiblapaz@alaroavant.com; 91112396.

#### **APROBACIÓN DEL ESTUDIO:**

Conforme a la legislación en España, este estudio ha sido revisado y aprobado por el Comité Ético de investigación Clínica (CEIC) del Hospital la Paz para su puesta en marcha el día

Además, la Agencia española de medicamentos y Productos Sanitarios (AEMPS) ha dado su autorización para la realización de esta investigación.

#### **CONTACTO:**

Si desea hacernos alguna pregunta o consulta no dude en contactar con el Dr..... del Servicio de Neurología del Hospital ..... (Teléfono: .....)

Código de protocolo: AMASCIS 02  
Versión3.0 de 08 de Mayo de 2020

1  
2  
3  
4  
5  
6  
7  
8  
9  
10  
11  
12  
13  
14  
15  
16  
17  
18  
19  
20  
21  
22  
23  
24  
25  
26  
27  
28  
29  
30  
31  
32  
33  
34  
35  
36  
37  
38  
39  
40  
41  
42  
43  
44  
45  
46  
47  
48  
49  
50  
51  
52  
53  
54  
55  
56  
57  
58  
59  
60

For peer review only

Código de protocolo: AMASCIS 02  
 Versión 3.0 de 08 de Mayo de 2020

## CONSENTIMIENTO INFORMADO PARA EL REPRESENTANTE LEGAL / FAMILIAR DEL PARTICIPANTE

**TÍTULO DEL ESTUDIO:** ADMINISTRACIÓN INTRAVENOSA DE CÉLULAS TRONCALES MESENQUIMALES ALOGÉNICAS DE TEJIDO ADIPOSEO EN EL INFARTO CEREBRAL AGUDO. ENSAYO CLÍNICO FASE IIB MULTICÉNTRICO Y DOBLE CIEGO CONTROLADO CON PLACEBO.

**CÓDIGO DEL ESTUDIO:** AMASCIS-2

**VERSIÓN:** 3.0 de 8 de mayo de 2020

**PROMOTOR:** Fundación para la Investigación Biomédica del Hospital Universitario de La Paz (FIBHULP)

**INVESTIGADOR COORDINADOR:** Exuperio Díez Tejedor.

**CENTRO:** Servicio de Neurología. Hospital Universitario La Paz.

Yo (nombre y apellidos del representante legal / familiar)

....., en calidad de (indique parentesco o relación) ..... de (nombre y apellidos del participante) ..... al ser su representante, afirmo que

- He leído la hoja de información que se me ha entregado.
- He podido hacer preguntas sobre el estudio.
- He recibido suficiente información sobre el estudio.

He hablado con el Dr. ....

Comprendo que la participación de mi representado es voluntaria.

Comprendo que puede retirarse del estudio:

1. Cuando quiera.
2. Sin tener que dar explicaciones.
3. Sin que esto repercuta en sus cuidados médicos.

Deseo que la información derivada de la investigación que pueda ser relevante para su salud me sea comunicada.

SI       NO

Consiento el almacenamiento y uso de las muestras biológicas y de los datos asociados para futuras investigaciones en las condiciones explicadas en la hoja de información al paciente.

SI       NO

Consiento ser contactado en el caso de necesitar más información o muestras biológicas adicionales

Código de protocolo: AMASCIS 02  
Versión3.0 de 08 de Mayo de 2020

SI       \_NO

Recibiré una copia firmada y fechada de este documento de consentimiento informado.

Presto libremente mi conformidad para la participación de mi representado en el estudio.

**FIRMA DEL REPRESENTANTE LEGAL  
/ FAMILIAR**

**FIRMA DEL INVESTIGADOR**

Fecha

Fecha

For peer review only



STANDARD PROTOCOL ITEMS: RECOMMENDATIONS FOR INTERVENTIONAL TRIALS

**Author comment: Items not mentioned in the manuscript sent for revision are not applicable or otherwise specified in the original study protocol**

SPIRIT 2013 Checklist: Recommended items to address in a clinical trial protocol and related documents\*

| Section/item                      | Item No   | Description                                                                                                                                                                                                                                                                              |
|-----------------------------------|-----------|------------------------------------------------------------------------------------------------------------------------------------------------------------------------------------------------------------------------------------------------------------------------------------------|
| <b>Administrative information</b> |           |                                                                                                                                                                                                                                                                                          |
| Title                             | 1         | Descriptive title identifying the study design, population, interventions, and, if applicable, trial acronym ( <b>Page 1</b> )                                                                                                                                                           |
| Trial registration                | 2a        | Trial identifier and registry name. If not yet registered, name of intended registry. ( <b>NCT04280003. EudraCT: 2019-001724-35</b> )                                                                                                                                                    |
|                                   | <b>2b</b> | All items from the World Health Organization Trial Registration Data Set (not applicable)                                                                                                                                                                                                |
| Protocol version                  | 3         | Date and version identifier ( <b>5<sup>th</sup>May 2020, version 2</b> )                                                                                                                                                                                                                 |
| Funding                           | 4         | Sources and types of financial, material, and other support ( <b>On pages 16-17</b> )                                                                                                                                                                                                    |
| Roles and responsibilities        | 5a        | Names, affiliations, and roles of protocol contributors ( <b>On page 1 and pages 18-19</b> ).                                                                                                                                                                                            |
|                                   | 5b        | Name and contact information for the trial sponsor ( <b>Page 16</b> ).                                                                                                                                                                                                                   |
|                                   | <b>5c</b> | Role of study sponsor and funders, if any, in study design; collection, management, analysis, and interpretation of data; writing of the report; and the decision to submit the report for publication, including whether they will have ultimate authority over any of these activities |
|                                   | <b>5d</b> | Composition, roles, and responsibilities of the coordinating centre, steering committee, endpoint adjudication committee, data management team, and other individuals or groups overseeing the trial, if applicable (see Item 21a for data monitoring committee)                         |
| <b>Introduction</b>               |           |                                                                                                                                                                                                                                                                                          |
| Background and rationale          | 6a        | Description of research question and justification for undertaking the trial, including summary of relevant studies (published and unpublished) examining benefits and harms for each intervention ( <b>Pages 5-7</b> )                                                                  |



|    |                                                                     |            |                                                                                                                                                                                                                                                                                                                                                                                                            |
|----|---------------------------------------------------------------------|------------|------------------------------------------------------------------------------------------------------------------------------------------------------------------------------------------------------------------------------------------------------------------------------------------------------------------------------------------------------------------------------------------------------------|
| 1  |                                                                     |            |                                                                                                                                                                                                                                                                                                                                                                                                            |
| 2  |                                                                     | <b>6b</b>  | Explanation for choice of comparators                                                                                                                                                                                                                                                                                                                                                                      |
| 3  |                                                                     |            |                                                                                                                                                                                                                                                                                                                                                                                                            |
| 4  | Objectives                                                          | 7          | Specific objectives or hypotheses ( <b>Pages 7-8</b> )                                                                                                                                                                                                                                                                                                                                                     |
| 5  |                                                                     |            |                                                                                                                                                                                                                                                                                                                                                                                                            |
| 6  | Trial design                                                        | 8          | Description of trial design including type of trial (eg, parallel group, crossover, factorial, single group), allocation ratio, and framework (eg, superiority, equivalence, noninferiority, exploratory) ( <b>Page 7</b> )                                                                                                                                                                                |
| 7  |                                                                     |            |                                                                                                                                                                                                                                                                                                                                                                                                            |
| 8  |                                                                     |            |                                                                                                                                                                                                                                                                                                                                                                                                            |
| 9  |                                                                     |            |                                                                                                                                                                                                                                                                                                                                                                                                            |
| 10 |                                                                     |            |                                                                                                                                                                                                                                                                                                                                                                                                            |
| 11 |                                                                     |            |                                                                                                                                                                                                                                                                                                                                                                                                            |
| 12 | <b>Methods: Participants, interventions, and outcomes</b>           |            |                                                                                                                                                                                                                                                                                                                                                                                                            |
| 13 |                                                                     |            |                                                                                                                                                                                                                                                                                                                                                                                                            |
| 14 | Study setting                                                       | 9          | Description of study settings (eg, community clinic, academic hospital) and list of countries where data will be collected. Reference to where list of study sites can be obtained). ( <b>Page 7</b> )                                                                                                                                                                                                     |
| 15 |                                                                     |            |                                                                                                                                                                                                                                                                                                                                                                                                            |
| 16 |                                                                     |            |                                                                                                                                                                                                                                                                                                                                                                                                            |
| 17 |                                                                     |            |                                                                                                                                                                                                                                                                                                                                                                                                            |
| 18 | Eligibility criteria                                                | 10         | Inclusion and exclusion criteria for participants. If applicable, eligibility criteria for study centres and individuals who will perform the interventions (eg, surgeons, psychotherapists) ( <b>Pages 8 - 10</b> )                                                                                                                                                                                       |
| 19 |                                                                     |            |                                                                                                                                                                                                                                                                                                                                                                                                            |
| 20 |                                                                     |            |                                                                                                                                                                                                                                                                                                                                                                                                            |
| 21 |                                                                     |            |                                                                                                                                                                                                                                                                                                                                                                                                            |
| 22 |                                                                     |            |                                                                                                                                                                                                                                                                                                                                                                                                            |
| 23 | Interventions                                                       | 11a        | Interventions for each group with sufficient detail to allow replication, including how and when they will be administered ( <b>Page 13</b> )                                                                                                                                                                                                                                                              |
| 24 |                                                                     |            |                                                                                                                                                                                                                                                                                                                                                                                                            |
| 25 |                                                                     |            |                                                                                                                                                                                                                                                                                                                                                                                                            |
| 26 |                                                                     | 11b        | Criteria for discontinuing or modifying allocated interventions for a given trial participant (eg, drug dose change in response to harms, participant request, or improving/worsening disease) ( <b>Page 13</b> )                                                                                                                                                                                          |
| 27 |                                                                     |            |                                                                                                                                                                                                                                                                                                                                                                                                            |
| 28 |                                                                     |            |                                                                                                                                                                                                                                                                                                                                                                                                            |
| 29 |                                                                     |            |                                                                                                                                                                                                                                                                                                                                                                                                            |
| 30 |                                                                     |            |                                                                                                                                                                                                                                                                                                                                                                                                            |
| 31 |                                                                     | <b>11c</b> | Strategies to improve adherence to intervention protocols, and any procedures for monitoring adherence (eg, drug tablet return, laboratory tests)                                                                                                                                                                                                                                                          |
| 32 |                                                                     |            |                                                                                                                                                                                                                                                                                                                                                                                                            |
| 33 |                                                                     |            |                                                                                                                                                                                                                                                                                                                                                                                                            |
| 34 |                                                                     |            |                                                                                                                                                                                                                                                                                                                                                                                                            |
| 35 |                                                                     | 11d        | Relevant concomitant care and interventions that are permitted or prohibited during the trial ( <b>Pages 8 and 13</b> )                                                                                                                                                                                                                                                                                    |
| 36 |                                                                     |            |                                                                                                                                                                                                                                                                                                                                                                                                            |
| 37 |                                                                     |            |                                                                                                                                                                                                                                                                                                                                                                                                            |
| 38 | Outcomes                                                            | 12         | Primary, secondary, and other outcomes, including the specific measurement variable (eg, systolic blood pressure), analysis metric (eg, change from baseline, final value, time to event), method of aggregation (eg, median, proportion), and time point for each outcome. Explanation of the clinical relevance of chosen efficacy and harm outcomes is strongly recommended. ( <b>Pages 10 and 11</b> ) |
| 39 |                                                                     |            |                                                                                                                                                                                                                                                                                                                                                                                                            |
| 40 |                                                                     |            |                                                                                                                                                                                                                                                                                                                                                                                                            |
| 41 |                                                                     |            |                                                                                                                                                                                                                                                                                                                                                                                                            |
| 42 |                                                                     |            |                                                                                                                                                                                                                                                                                                                                                                                                            |
| 43 |                                                                     |            |                                                                                                                                                                                                                                                                                                                                                                                                            |
| 44 |                                                                     |            |                                                                                                                                                                                                                                                                                                                                                                                                            |
| 45 |                                                                     |            |                                                                                                                                                                                                                                                                                                                                                                                                            |
| 46 | Participant timeline                                                | 13         | Time schedule of enrolment, interventions (including any run-ins and washouts), assessments, and visits for participants. A schematic diagram is highly recommended (see Figure) ( <b>Pages 11-13</b> )                                                                                                                                                                                                    |
| 47 |                                                                     |            |                                                                                                                                                                                                                                                                                                                                                                                                            |
| 48 |                                                                     |            |                                                                                                                                                                                                                                                                                                                                                                                                            |
| 49 |                                                                     |            |                                                                                                                                                                                                                                                                                                                                                                                                            |
| 50 |                                                                     |            |                                                                                                                                                                                                                                                                                                                                                                                                            |
| 51 | Sample size                                                         | 14         | Estimated number of participants needed to achieve study objectives and how it was determined, including clinical and statistical assumptions supporting any sample size calculations ( <b>Page 14</b> )                                                                                                                                                                                                   |
| 52 |                                                                     |            |                                                                                                                                                                                                                                                                                                                                                                                                            |
| 53 |                                                                     |            |                                                                                                                                                                                                                                                                                                                                                                                                            |
| 54 |                                                                     |            |                                                                                                                                                                                                                                                                                                                                                                                                            |
| 55 | Recruitment                                                         | 15         | Strategies for achieving adequate participant enrolment to reach target sample size ( <b>Page 8</b> )                                                                                                                                                                                                                                                                                                      |
| 56 |                                                                     |            |                                                                                                                                                                                                                                                                                                                                                                                                            |
| 57 |                                                                     |            |                                                                                                                                                                                                                                                                                                                                                                                                            |
| 58 |                                                                     |            |                                                                                                                                                                                                                                                                                                                                                                                                            |
| 59 | <b>Methods: Assignment of interventions (for controlled trials)</b> |            |                                                                                                                                                                                                                                                                                                                                                                                                            |
| 60 |                                                                     |            |                                                                                                                                                                                                                                                                                                                                                                                                            |

## Allocation:

- Sequence generation 16a Method of generating the allocation sequence (eg, computer-generated random numbers), and list of any factors for stratification. To reduce predictability of a random sequence, details of any planned restriction (eg, blocking) should be provided in a separate document that is unavailable to those who enrol participants or assign interventions (**Page 10**)
- Allocation concealment mechanism 16b Mechanism of implementing the allocation sequence (eg, central telephone; sequentially numbered, opaque, sealed envelopes), describing any steps to conceal the sequence until interventions are assigned (**Page 10**)
- Implementation 16c Who will generate the allocation sequence, who will enrol participants, and who will assign participants to interventions (**Pages 8 and 10**)
- Blinding (masking) 17a Who will be blinded after assignment to interventions (eg, trial participants, care providers, outcome assessors, data analysts), and how (**Page 10**)
- 17b If blinded, circumstances under which unblinding is permissible, and procedure for revealing a participant's allocated intervention during the trial

**Methods: Data collection, management, and analysis**

- Data collection methods 18a Plans for assessment and collection of outcome, baseline, and other trial data, including any related processes to promote data quality (eg, duplicate measurements, training of assessors) and a description of study instruments (eg, questionnaires, laboratory tests) along with their reliability and validity, if known. Reference to where data collection forms can be found, if not in the protocol (**Page 10-11**)
- 18b Plans to promote participant retention and complete follow-up, including list of any outcome data to be collected for participants who discontinue or deviate from intervention protocols
- Data management 19 Plans for data entry, coding, security, and storage, including any related processes to promote data quality (eg, double data entry; range checks for data values). Reference to where details of data management procedures can be found, if not in the protocol (**Page 15**)
- Statistical methods 20a Statistical methods for analysing primary and secondary outcomes. Reference to where other details of the statistical analysis plan can be found, if not in the protocol (**Page 14 and 15**)
- 20b Methods for any additional analyses (eg, subgroup and adjusted analyses) (**Page 15**)

1  
2 20c Definition of analysis population relating to protocol non-adherence  
3 (eg, as randomised analysis), and any statistical methods to handle  
4 missing data (eg, multiple imputation) **(Page 15)**  
5

6 **Methods: Monitoring**  
7

8 Data monitoring 21a Composition of data monitoring committee (DMC); summary of its role  
9 and reporting structure; statement of whether it is independent from  
10 the sponsor and competing interests; and reference to where further  
11 details about its charter can be found, if not in the protocol.  
12 Alternatively, an explanation of why a DMC is not needed **(Page 15)**  
13

14  
15 **21b** Description of any interim analyses and stopping guidelines, including  
16 who will have access to these interim results and make the final  
17 decision to terminate the trial  
18

19 Harms 22 Plans for collecting, assessing, reporting, and managing solicited and  
20 spontaneously reported adverse events and other unintended effects  
21 of trial interventions or trial conduct **(Page 10)**  
22

23  
24 Auditing 23 Frequency and procedures for auditing trial conduct, if any, and  
25 whether the process will be independent from investigators and the  
26 sponsor **(Page 15)**  
27

28  
29 **Ethics and dissemination**  
30

31 Research ethics 24 Plans for seeking research ethics committee/institutional review board  
32 approval **(Page 17)**  
33

34 Protocol amendments 25 Plans for communicating important protocol modifications (eg,  
35 changes to eligibility criteria, outcomes, analyses) to relevant parties  
36 (eg, investigators, REC/IRBs, trial participants, trial registries, journals,  
37 regulators) **(Page 17)**  
38

39  
40 Consent or assent 26a Who will obtain informed consent or assent from potential trial  
41 participants or authorised surrogates, and how (see Item 32) **(Page**  
42 **17)**  
43

44 26b Additional consent provisions for collection and use of participant data  
45 and biological specimens in ancillary studies, if applicable **(included**  
46 **in the informed consent form as supplementary material).**  
47

48 Confidentiality 27 How personal information about potential and enrolled participants will  
49 be collected, shared, and maintained in order to protect confidentiality  
50 before, during, and after the trial **(Page 18)**  
51

52  
53 Declaration of interests 28 Financial and other competing interests for principal investigators for  
54 the overall trial and each study site **(Page 16)**  
55

56 Access to data 29 Statement of who will have access to the final trial dataset, and  
57 disclosure of contractual agreements that limit such access for  
58 investigators **(Page 18)**  
59  
60

|    |                   |            |                                                                                  |
|----|-------------------|------------|----------------------------------------------------------------------------------|
| 1  |                   |            |                                                                                  |
| 2  | Ancillary and     | 30         | Provisions, if any, for ancillary and post-trial care, and for                   |
| 3  | post-trial care   |            | compensation to those who suffer harm from trial participation ( <b>Page</b>     |
| 4  |                   |            | <b>18</b> )                                                                      |
| 5  |                   |            |                                                                                  |
| 6  | Dissemination     | 31a        | Plans for investigators and sponsor to communicate trial results to              |
| 7  | policy            |            | participants, healthcare professionals, the public, and other relevant           |
| 8  |                   |            | groups (eg, via publication, reporting in results databases, or other            |
| 9  |                   |            | data sharing arrangements), including any publication restrictions               |
| 10 |                   |            | <b>(Page 18)</b>                                                                 |
| 11 |                   |            |                                                                                  |
| 12 |                   |            |                                                                                  |
| 13 |                   | <b>31b</b> | Authorship eligibility guidelines and any intended use of professional           |
| 14 |                   |            | writers                                                                          |
| 15 |                   |            |                                                                                  |
| 16 |                   | 31c        | Plans, if any, for granting public access to the full protocol, participant-     |
| 17 |                   |            | level dataset, and statistical code ( <b>Page 18</b> )                           |
| 18 |                   |            |                                                                                  |
| 19 |                   |            |                                                                                  |
| 20 | <b>Appendices</b> |            |                                                                                  |
| 21 |                   |            |                                                                                  |
| 22 | Informed consent  | 32         | Model consent form and other related documentation given to                      |
| 23 | materials         |            | participants and authorised surrogates ( <b>provided as supplementary</b>        |
| 24 |                   |            | <b>data</b> )                                                                    |
| 25 |                   |            |                                                                                  |
| 26 | Biological        | 33         | Plans for collection, laboratory evaluation, and storage of biological           |
| 27 | specimens         |            | specimens for genetic or molecular analysis in the current trial and for         |
| 28 |                   |            | future use in ancillary studies, if applicable ( <b>included in the informed</b> |
| 29 |                   |            | <b>consent form</b> ).                                                           |
| 30 |                   |            |                                                                                  |
| 31 |                   |            |                                                                                  |

---

\*It is strongly recommended that this checklist be read in conjunction with the SPIRIT 2013 Explanation & Elaboration for important clarification on the items. Amendments to the protocol should be tracked and dated. The SPIRIT checklist is copyrighted by the SPIRIT Group under the Creative Commons "[Attribution-NonCommercial-NoDerivs 3.0 Unported](https://creativecommons.org/licenses/by-nc-nd/3.0/)" license.
