# Supplementary material for: Allogeneic adipose tissue-derived mesenchymal stem cells in ischaemic stroke (AMASCIS-02): a phase IIb, multicentre, double-blind, placebo-controlled clinical trial protocol
Source: PubMed Central journal article supplement — BMJ Open. 2021 Aug 9;11(8):e051790. doi: 10.1136/bmjopen-2021-051790 (PMC8354278; doi:10.1136/bmjopen-2021-051790), 2021-08-09
Supplement: bmjopen-2021-051790supp001.pdf [file bmjopen-2021-051790supp001.pdf]

Código de protocolo: AMASCIS 02  
Versión 3.0 de 08 de Mayo de 2020

## HOJA DE INFORMACIÓN PARA EL REPRESENTANTE LEGAL / FAMILIAR DEL PARTICIPANTE

**TÍTULO DEL ESTUDIO:** ADMINISTRACIÓN INTRAVENOSA DE CÉLULAS TRONCALES MESENQUIMALES ALOGÉNICAS DE TEJIDO ADIPOSO EN EL INFARTO CEREBRAL AGUDO. ENSAYO CLÍNICO FASE IIB MULTICÉNTRICO Y DOBLE CIEGO CONTROLADO CON PLACEBO.

**CÓDIGO DEL ESTUDIO:** AMASCIS-2

**VERSIÓN:** 3.0 de 8 de mayo de 2020

**PROMOTOR:** Fundación para la Investigación Biomédica del Hospital Universitario de La Paz (FIBHULP)

**INVESTIGADOR COORDINADOR:** Exuperio Díez Tejedor.

**CENTRO:** \_\_\_\_\_

### INTRODUCCIÓN

Nos gustaría invitar a su representado a participar en este estudio clínico, quien en este momento no se considera en plenas facultades para comprender la información y dar su consentimiento. Antes de decidir si desea que participe en este estudio, tómese todo el tiempo que necesite para revisar toda la información y pregunte todo lo que quiera. El estudio ha sido aprobado por un Comité de Ética con medicamentos y por la Agencia Española de Medicamentos y Productos Sanitarios, de acuerdo con la legislación vigente. Antes de aceptar la participación de su representado en este estudio debe comprender por completo porqué se está realizando el estudio y lo que va a implicar. Debe preguntarle al médico si existen otros tratamientos disponibles para la enfermedad de su representado. No debe consentir su participación a menos que esté completamente de acuerdo con todos los procedimientos implicados.

### ANTECEDENTES Y OBJETIVO DEL ESTUDIO

Estamos solicitando que su representado participe en este ensayo clínico porque ha padecido un ictus agudo. Un ictus está provocado por una obstrucción del flujo sanguíneo a una parte del cerebro. Algunas de las células del área del cerebro que no reciben sangre se mueren inmediatamente. Además, después del ictus, en el cerebro se producen una serie de procesos nocivos que provocan que se mueran más células cerebrales. Esto supone que las secuelas provocadas por el ictus podrían aumentar. Pero también se activan procesos que intentan reparar el daño, en la mayoría de las ocasiones son insuficientes para conseguir mejorar el pronóstico.

Las células troncales, también conocidas como células madre, son células inmaduras con capacidad de autoregenerarse y de diferenciarse en múltiples tipos celulares. Hasta ahora

Código de protocolo: AMASCIS 02  
Versión 3.0 de 08 de Mayo de 2020

se han ensayado tratamientos basados en la administración de células troncales en varias enfermedades neurológicas. La administración intravenosa de células troncales mesenquimales autólogas ha sido factible y segura, y se ha sugerido una mejoría en la recuperación neurológica en pacientes con infarto cerebral grave. Además, se ha constatado la seguridad de este tratamiento a los 5 años de su administración. En el estudio AMASCIS-01, similar al que se le invita a participar, se incluyeron 19 pacientes y se llegó a administrar las células a 4 de ellos sin que se detectara ningún efecto adverso relacionado con su administración

El objetivo de este estudio de investigación es evaluar la seguridad del tratamiento alogénico (procedentes de un donante) precoz con células troncales procedentes de tejido adiposo en pacientes que han sufrido un ictus agudo. También se recogerán datos sobre su posible eficacia en la reducción de secuelas.

## DESARROLLO DEL ESTUDIO

Si usted consiente la participación de su representado en el estudio, usted deberá firmar este formulario de consentimiento informado. Su médico realizará algunas pruebas médicas y otros procedimientos para determinar si su representado reúne los requisitos para participar en el estudio. Deberá informar si ha padecido problemas médicos en el pasado. Como parte del estudio habitual en pacientes con ictus agudo se le practicará una exploración general y neurológica, incluyendo mediciones de la presión arterial, el pulso, la temperatura, la glucosa en sangre capilar, la saturación de oxígeno y se le realizará un electrocardiograma. Se le tomará una muestra sanguínea para realizar pruebas generales de laboratorio. Su representado no podrá participar en el estudio en caso de embarazo o lactancia. En caso de que su representado sea una mujer en edad fértil, es necesario que ella se comprometa a usar métodos anticonceptivos adecuados y efectivos (dispositivos intrauterinos no hormonales, oclusión tubárica bilateral, pareja vasectomizada o abstinencia sexual) durante la duración del estudio (24 meses). Previo a la inclusión de su representado en este estudio, se le habrá realizado una tomografía computarizada (TC) craneal o una resonancia magnética (RM) cerebral como parte del estudio habitual del ictus, en las cuales se habrá verificado que tiene un infarto cerebral.

Se prevé que un total de 30 personas participen en el estudio. Si su representado reúne los requisitos para participar, la duración de su participación en el mismo será de aproximadamente 24 meses. Se le asignará aleatoriamente (como cara o cruz, o sacando un número de un bombo) a recibir el fármaco del estudio (células troncales mesenquimales) o placebo. El placebo es una sustancia que tiene el aspecto del fármaco del estudio pero no contiene sustancia farmacológicamente activa, por lo que no se espera que tenga efecto. Su representado tendrá un 50% de posibilidades de recibir el fármaco del estudio y un 50% de posibilidades de recibir el placebo. Ni usted, ni su representado ni el médico del estudio sabrán si está recibiendo el fármaco del estudio o el placebo. Sin embargo, el médico del estudio podrá identificar el tratamiento en caso de emergencia médica.

Código de protocolo: AMASCIS 02  
Versión 3.0 de 08 de Mayo de 2020

El fármaco del estudio o el placebo se administrarán por vía intravenosa (a través de una pequeña vía de perfusión colocada en la vena del brazo) en una sola dosis alrededor del cuarto día desde el inicio del ictus, mientras su representado permanece hospitalizado. Todos los pacientes recibirán el tratamiento convencional del infarto cerebral de acuerdo a las actuales guías de práctica clínica y vías al uso. Como pruebas adicionales al manejo y tratamiento convencional del ictus, al participar en el estudio se le extraerán en 3 ocasiones muestras de sangre adicionales para el análisis de sustancias relacionadas con la recuperación y regeneración del tejido cerebral.

El estudio tendrá una duración total de **24 meses**, estando previstas **10 visitas**

**Primera visita:** Tras comprobar que su representado cumple los criterios de inclusión y ninguno de los de exclusión para participar en este ensayo, el médico le informará a usted acerca del estudio y le pedirá su consentimiento por escrito. Se le preguntará por el estado funcional previo de su representado (actividades que antes del ictus podía realizar de forma independiente o si requería alguna ayuda), y se le realizará un examen clínico que incluirá una medición de las constantes vitales, una exploración clínica completa y una exploración neurológica detallada. En el caso de las mujeres en edad fértil se realizará además un test de embarazo. Se registrarán los resultados de las pruebas ya realizadas como parte de la práctica clínica habitual en el ictus. La asignación aleatoria de la administración del fármaco del estudio o del placebo se realizará también en esta visita.

**Segunda visita:** Tendrá lugar en el momento de administración del fármaco. Se repasarán los criterios para la participación en el ensayo. Se le realizará a su representado un examen clínico general y una exploración neurológica detallada. Se realizará además un nuevo electrocardiograma. Adicionalmente se le tomará una muestra de sangre para analizar sustancias relacionadas con la recuperación y reparación del tejido cerebral tras un infarto cerebral. Cualquier evento adverso se registrará.

**Tercera visita:** tendrá lugar a las 2 horas de la finalización del tratamiento por vía intravenosa e incluirá la medición de las constantes vitales de su representado y una exploración neurológica detallada (escala NIHSS), así como el registro de cualquier acontecimiento adverso.

**Cuarta y quinta visitas:** se realizarán a las 24h y a los 7 días (o alta hospitalaria en caso de que ocurra antes del día 7) desde la administración del fármaco. A su representado se le realizará una medición de las constantes vitales, así como una exploración clínica general y neurológica detalladas. Se anotarán todos los fármacos que haya recibido además del fármaco del estudio. Se realizará un nuevo electrocardiograma en la cuarta visita y se tomarán muestras de sangre para asegurarnos de su seguridad durante el estudio, además de analizar las sustancias involucradas en regeneración cerebral en la quinta visita. Cualquier evento adverso se registrará

Código de protocolo: AMASCIS 02  
Versión 3.0 de 08 de Mayo de 2020

**Sexta visita:** Se realiza en el mes 3 desde la inclusión de su representado en el estudio. Se le realizará una exploración clínica general y neurológica detallada. Se extraerán de nuevo muestras de sangre para analizar las sustancias relacionadas con la regeneración cerebral. Se registrarán los posibles acontecimientos adversos ocurridos y los fármacos que esté tomando en ese momento.

**Séptima a novena visitas:** se realizarán a los 6, 12, y 18 meses desde la inclusión de su representado en el estudio. De nuevo se realizará una exploración clínica general y neurológica completas y se anotarán las posibles reacciones adversas y los fármacos que esté tomando.

**Última visita:** se realizará a los 24 meses desde la inclusión en el estudio. Se repetirá una exploración clínica general y neurológica completas. Adicionalmente se realizará una analítica y un electrocardiograma de 12 derivaciones. De nuevo, será preguntado por los fármacos que su representado haya precisado tomar desde la última visita, y se registrará cualquier evento adverso.

## RIESGOS POSIBLES

Estudios previos han observado que la infusión intravenosa de células troncales mesenquimales alogénicas es factible y segura, y se ha sugerido una mejoría en la recuperación de las secuelas en pacientes con infarto cerebral grave. Además se ha constatado la seguridad de este tratamiento a los 5 años del tratamiento. El uso de estas células administradas por vía intravenosa en pacientes con otras enfermedades diferentes al ictus también ha sido seguro, siendo los efectos adversos más frecuentes fiebre (<30%), malestar general (10%), síntomas similares a una gripe (10%), infecciones de orina (<35%), infecciones respiratorias (<30%), otitis (<10%), erupción cutánea (<10%), debilidad muscular (<10%), náuseas (<20%), vómitos (<20%), diarrea (<10%), caries dental (<10%), anemia (<10%). Una revisión de 70 estudios con administración de células troncales del tejido adiposo en 1474 pacientes con otras enfermedades distintas al ictus observaron muy pocos efectos adversos relacionados directamente con la terapia celular. No se ha observado incremento del riesgo de cáncer ni de tromboembolismo pulmonar. Sin embargo, puesto que se trata de un fármaco experimental (aún no se encuentra autorizado o comercializado), pueden existir otros efectos secundarios y riesgos que aún no hayan sido descritos. No se espera que ocurran efectos adversos con el placebo, al ser una sustancia no activa farmacológicamente.

La extracción de sangre del brazo de su representado puede provocar dolor, moratones y en pocas ocasiones una infección.

Código de protocolo: AMASCIS 02  
Versión 3.0 de 08 de Mayo de 2020

## **BENEFICIOS POSIBLES**

En algún estudio anterior, el tratamiento con células troncales se asoció con una mejoría en la recuperación neurológica en algunos pacientes con infarto cerebral grave. Sin embargo, no es posible predecir ni garantizar si este fármaco en estudio ayudará a mejorar la enfermedad de su representado. Sus síntomas pueden mejorar, seguir igual o empeorar. En cualquier caso, la participación de su representado en el estudio puede ayudar a otros pacientes que sufran ictus en el futuro.

## **TRATAMIENTOS ALTERNATIVOS**

Su representado recibirá todos los tratamientos actualmente establecidos en el infarto cerebral agudo que requiera según las características de su infarto cerebral (tipo de infarto y duración de los síntomas). Existen otros tratamientos en experimentación diseñados para proteger y reparar el cerebro en los infartos cerebrales, pero ninguno de ellos cuenta todavía con aprobación para su utilización en pacientes fuera de estudios de investigación como el que le proponemos.

## **DEBERES DEL PARTICIPANTE DEL ESTUDIO**

Como participante en el estudio, su representado está obligado a respetar las instrucciones médicas del médico del estudio. Se debe informar detalladamente a su médico de la evolución de su enfermedad y de cualquier malestar o dolencia que se pueda observar, así como de los tratamientos que esté tomando prescritos por otro médico y de aquellos comprados sin receta, incluyendo los tratamientos homeopáticos y suplementos vitamínicos.

## **NUEVAS INFORMACIONES**

Si aparece cualquier nueva información sobre la seguridad del tratamiento con células troncales mesenquimales alogénicas, le informaremos a usted para que pueda decidir si desea que su representante continúe participando en este estudio de investigación. Si decide seguir participando en el estudio tras haber recibido esta nueva información, se le pedirá que firme un documento actualizado de consentimiento. Si decide que se retire del estudio, esto no tendrá repercusión sobre el tratamiento que reciba en el futuro por su enfermedad.

## **INTERRUPCIÓN PRECOZ DEL ESTUDIO**

La participación en este estudio de investigación es voluntaria. Puede negarse a que su representado participe o solicitar que abandone su participación en cualquier momento, sin ningún tipo de penalización. La calidad de su atención sanitaria no se verá alterada y recibirá los cuidados habituales que los pacientes con ictus reciben en su hospital. El

Código de protocolo: AMASCIS 02  
Versión 3.0 de 08 de Mayo de 2020

médico del estudio puede poner fin a la participación de su representado en el estudio en caso de una reacción inesperada, si éste incumple las instrucciones dadas por el personal del estudio o porque todo el estudio sea interrumpido. Si decide que su representado no continúe participando en este estudio, el médico realizará los trámites oportunos para que sus cuidados continúen.

### **OBTENCIÓN Y USO DE MUESTRAS BIOLÓGICAS:**

La participación en este ensayo clínico conlleva la obtención y utilización de muestras biológicas con fines de investigación, para lo que se observará la Ley 14/2007 de investigación biomédica y el Real Decreto 1716/2011, normativas que garantizan el respeto a los derechos que le asisten. Al firmar este documento, revisado y evaluado por el Comité de Ética de la Investigación con medicamentos que ha aprobado este ensayo clínico, usted acepta que se utilicen las muestras procedentes de su representado para las finalidades del presente estudio.

Algunas de las muestras se obtienen durante el seguimiento habitual de la enfermedad o proceso; otras son solicitadas porque son necesarias para cumplir con los objetivos de estudio. Entre las pruebas que se obtienen como parte del seguimiento habitual se encuentran análisis de hemograma, coagulación y datos de bioquímica básica; obtenidas en las visitas 1, 4, 5 y 10. Como pruebas adicionales del estudio se encuentran el análisis de factores relacionados con la regeneración y recuperación del tejido cerebral que se obtendrán en las visitas 2, 5 y 6.

Las muestras de sangre que forman parte del estudio habitual del ictus permanecerán almacenadas en el hospital donde se realiza la extracción (Hospital Universitario La Paz u Hospital Universitario Virgen del Rocío); y posteriormente parte de las muestras se analizarán en el Hospital Universitario Virgen Macarena y otra parte en el Hospital Universitario La Paz.

La cantidad extraída en cada análisis de sangre de seguimiento habitual serán tres tubos, mientras que en los análisis específicos del estudio serán cinco tubos. Cada tubo contiene aproximadamente 2 ml de sangre. Los posibles riesgos derivados del procedimiento realizado para la obtención de estas muestras estarán cubiertos por el seguro del ensayo clínico.

Las muestras estarán asociadas a un código que solo podrá ser relacionado con la identidad de su representado por personal autorizado (médicos, enfermeros y personal de laboratorio). Los datos que se deriven de la utilización de estas muestras se tratarán del mismo modo que el resto de datos que se obtengan durante este ensayo (ver apartado confidencialidad y protección de datos personales). Las muestras y los datos asociados se mantendrán bajo las condiciones de seguridad adecuadas y se garantiza que los sujetos no podrán ser identificados a través de medios considerados razonables por personas distintas a las autorizadas.

Código de protocolo: AMASCIS 02  
Versión 3.0 de 08 de Mayo de 2020

Durante el desarrollo del ensayo las muestras pueden ser analizadas en diversos laboratorios y se mantendrán almacenadas durante 10 años, en previsión de que fuera necesario repetir algún análisis adicional relacionado con los objetivos del estudio. Durante este tiempo, el responsable de las muestras será el promotor del ensayo. En caso de conservación para usos futuros de las muestras, se mantendrán almacenadas en el Instituto de Genética Médica y Molecular (INGEMM), Sección de Farmacogenética Hospital Universitario La Paz, durante 10 años. En el caso del Hospital Universitario Virgen Macarena serán almacenadas en su Biobanco.

Una vez finalizado el ensayo, las muestras sobrantes serán destruidas, a no ser que usted consienta para que puedan ser almacenadas y utilizadas en futuras investigaciones. La finalidad del almacenamiento de estas muestras es que sean utilizadas en proyectos de investigación en el futuro.

Si cambiara de opinión en relación con la donación de muestras biológicas y la cesión de los datos proporcionados, tiene derecho a solicitar su destrucción o anonimización, a través del médico/investigador/investigador principal de la colección. No obstante, debe saber que los datos que se hayan obtenido en los análisis realizados hasta ese momento podrán ser utilizados para los fines solicitados y podrán conservarse en cumplimiento de las obligaciones legales correspondientes.

En el caso de que en este ensayo se obtengan datos que pudieran ser clínica o genéticamente relevantes para su representado, e interesar a su salud o a la de su familia, podrá solicitar que le sean comunicados por su médico del ensayo si así lo indica en la casilla que aparece al final de este documento. No obstante, si usted hubiera indicado su negativa y cuando esta información según criterio del médico responsable, sea necesaria para evitar un grave perjuicio para la salud de su representado o la de sus familiares biológicos, se informará a un familiar próximo o a un representante, previa consulta al Comité de Ética Asistencial del centro. La comunicación de esta información se llevará a cabo por profesionales que le podrán explicar adecuadamente su relevancia y las opciones que se pudieran plantear. En caso de información genética clínicamente relevante podrá recibir el preceptivo consejo genético.

Hable con su médico sobre la posibilidad de que pueda establecer restricciones para que la muestra biológica de su representado no sea utilizada en determinadas investigaciones.

## **COSTE**

Ni a su representado ni a usted les costará nada participar en el estudio y no recibirán ningún pago por participar. El coste de la terapia con células troncales la asumirá el hospital promotor del estudio gracias a una ayuda del Instituto de Salud Carlos III.

## **COMPENSACIÓN**

Código de protocolo: AMASCIS 02  
Versión 3.0 de 08 de Mayo de 2020

Todas las pruebas médicas y tratamientos (tanto experimentales como de rutina) implican cierto riesgo de lesión. Si su representado nota o experimenta cualquier lesión relacionada con este estudio clínico, y se han seguido las instrucciones de sus médicos y del resto del personal de estudio, el promotor del mismo cubrirá los gastos médicos para tratar la lesión. No se ofrecerá ninguna compensación si la lesión fuera provocada por un incumplimiento de las instrucciones del personal de la investigación. El promotor no ofrecerá ninguna otra compensación.

## **SEGUROS**

El hospital promotor del estudio ha contratado una póliza de seguro de Responsabilidad Civil con la compañía Hannover Seguros España.

## **CONFIDENCIALIDAD Y PROTECCIÓN DE DATOS PERSONALES:**

El tratamiento, la comunicación y la cesión de los datos de carácter personal de todos los pacientes participantes se ajustará a lo dispuesto en el Reglamento (UE) 2016/679 del Parlamento europeo y del Consejo de 27 de abril de 2016 de Protección de Datos (RGPD).

-De acuerdo con lo que establece la legislación mencionada, usted puede ejercer los derechos de acceso, rectificación, oposición y supresión de los datos de su representado, para lo cual deberá dirigirse a su médico del estudio. También puede limitar el tratamiento de datos que sean incorrectos, solicitar una copia o que se trasladen a un tercero (portabilidad) los datos que usted ha facilitado para el estudio. Para ejercitar sus derechos, diríjase al investigador principal del estudio o al Delegado de Protección de datos del centro: José Manuel Laperal González [tfno: 91426998/ e-mail: protecciondedatos.sanidad@madrid.org.

Le recordamos que los datos no se pueden eliminar aunque su representado deje de participar en el ensayo para garantizar la validez de la investigación y cumplir con los deberes legales y los requisitos de autorización de medicamentos. Si usted decide retirar el consentimiento para la participación de su representado en este estudio, ningún dato nuevo será añadido a la base de datos, pero sí se utilizarán los que ya se hayan recogido. Así mismo tiene derecho a dirigirse a la Agencia de Protección de Datos si no quedara satisfecho

Tanto el Centro como el Promotor son responsables respectivamente del tratamiento de los datos y se comprometen a cumplir con la normativa de protección de datos en vigor. Los datos recogidos para el estudio estarán identificados mediante un código, de manera que no se incluya información que pueda identificar a su representado, y sólo su médico del estudio/colaboradores podrá relacionar dichos datos con él/ella y con su historia clínica. Por lo tanto, su identidad no será revelada a ninguna otra persona salvo a las autoridades sanitarias, cuando así lo requieran o en casos de urgencia médica. Los Comités de Ética de la Investigación, los representantes de la Autoridad Sanitaria en materia de inspección y el personal autorizado por el Promotor, únicamente podrán

Código de protocolo: AMASCIS 02  
Versión 3.0 de 08 de Mayo de 2020

acceder para comprobar los datos personales, los procedimientos del estudio clínico y el cumplimiento de las normas de buena práctica clínica (siempre manteniendo la confidencialidad de la información).

El Investigador y el Promotor están obligados a conservar los datos recogidos para el estudio al menos hasta 25 años tras su finalización. Posteriormente, la información personal solo se conservará por el centro para el cuidado de la salud de su representado y por el promotor para otros fines de investigación científica si usted hubiera otorgado su consentimiento para ello, y si así lo permite la ley y requisitos éticos aplicables.

Si realizáramos transferencia de los datos de su representado codificados fuera de la UE a las entidades de nuestro grupo, a prestadores de servicios o a investigadores científicos que colaboren con nosotros, los datos del participante quedarán protegidos con salvaguardas tales como contratos u otros mecanismos por las autoridades de protección de datos. Si el participante o usted quiere saber más al respecto, puede contactar al/a la Delegado/a de Protección de Datos del promotor o la institución Delegado/a de Protección de Datos del promotor o la institución. Alaro Avant, S.L. Avda. de Brasil 17, 7G, 28020, Madrid dpo.fiblapaz@alaroavant.com; 91112396.

#### **APROBACIÓN DEL ESTUDIO:**

Conforme a la legislación en España, este estudio ha sido revisado y aprobado por el Comité Ético de investigación Clínica (CEIC) del Hospital la Paz para su puesta en marcha el día

Además, la Agencia española de medicamentos y Productos Sanitarios (AEMPS) ha dado su autorización para la realización de esta investigación.

#### **CONTACTO:**

Si desea hacernos alguna pregunta o consulta no dude en contactar con el Dr. .... del Servicio de Neurología del Hospital ..... (Teléfono: .....)

Código de protocolo: AMASCIS 02  
Versión3.0 de 08 de Mayo de 2020

Código de protocolo: AMASCIS 02  
Versión 3.0 de 08 de Mayo de 2020

## CONSENTIMIENTO INFORMADO PARA EL REPRESENTANTE LEGAL / FAMILIAR DEL PARTICIPANTE

**TÍTULO DEL ESTUDIO:** ADMINISTRACIÓN INTRAVENOSA DE CÉLULAS TRONCALES MESENQUIMALES ALOGÉNICAS DE TEJIDO ADIPOSO EN EL INFARTO CEREBRAL AGUDO. ENSAYO CLÍNICO FASE IIB MULTICÉNTRICO Y DOBLE CIEGO CONTROLADO CON PLACEBO.

**CÓDIGO DEL ESTUDIO:** AMASCIS-2

**VERSIÓN:** 3.0 de 8 de mayo de 2020

**PROMOTOR:** Fundación para la Investigación Biomédica del Hospital Universitario de La Paz (FIBHULP)

**INVESTIGADOR COORDINADOR:** Exuperio Díez Tejedor.

**CENTRO:** Servicio de Neurología. Hospital Universitario La Paz.

Yo (nombre y apellidos del representante legal / familiar)

....., en calidad de (indique parentesco o relación) ..... de (nombre y apellidos del participante) ..... al ser su representante, afirmo que

- He leído la hoja de información que se me ha entregado.
- He podido hacer preguntas sobre el estudio.
- He recibido suficiente información sobre el estudio.

He hablado con el Dr. ....

Comprendo que la participación de mi representado es voluntaria.

Comprendo que puede retirarse del estudio:

1. Cuando quiera.
2. Sin tener que dar explicaciones.
3. Sin que esto repercuta en sus cuidados médicos.

Deseo que la información derivada de la investigación que pueda ser relevante para su salud me sea comunicada.

☐ SI ☐ NO

Consiento el almacenamiento y uso de las muestras biológicas y de los datos asociados para futuras investigaciones en las condiciones explicadas en la hoja de información al paciente.

☐ SI ☐ NO

Consiento ser contactado en el caso de necesitar más información o muestras biológicas adicionales

Código de protocolo: AMASCIS 02  
Versión 3.0 de 08 de Mayo de 2020

☐ SI      ☐ \_NO

Recibiré una copia firmada y fechada de este documento de consentimiento informado.

Presto libremente mi conformidad para la participación de mi representado en el estudio.

**FIRMA DEL REPRESENTANTE LEGAL  
/ FAMILIAR**

**FIRMA DEL INVESTIGADOR**

Fecha

Fecha
